# Supplementary material for: Mapping cortical mesoscopic networks of single spiking cortical or sub-cortical neurons
Source: eLife journal article supplement (doi:10.7554/elife.19976), 2017-02-04

# Subcortical STMs for All Spikes vs. Bursting Conditions

All

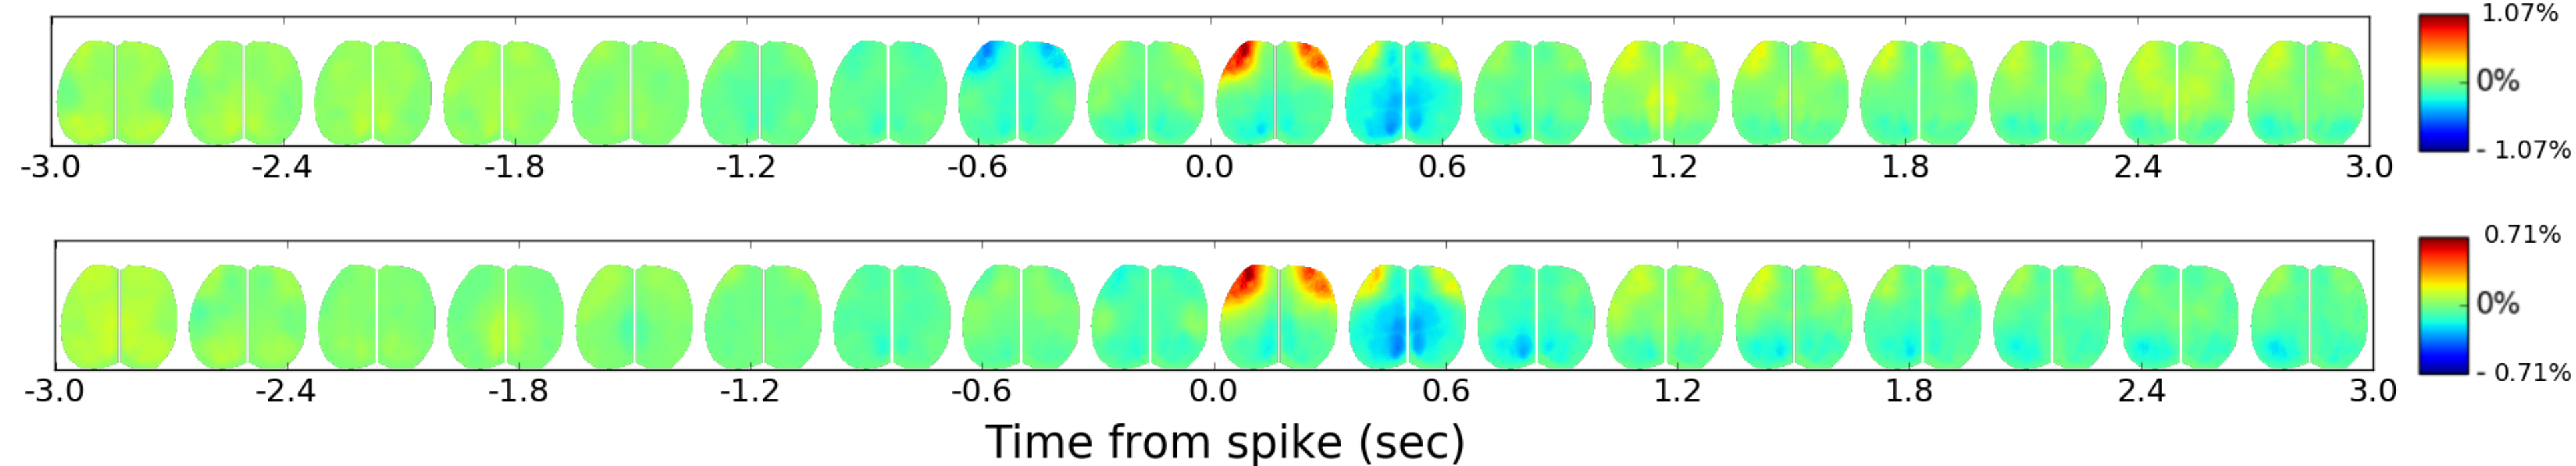

Bursting

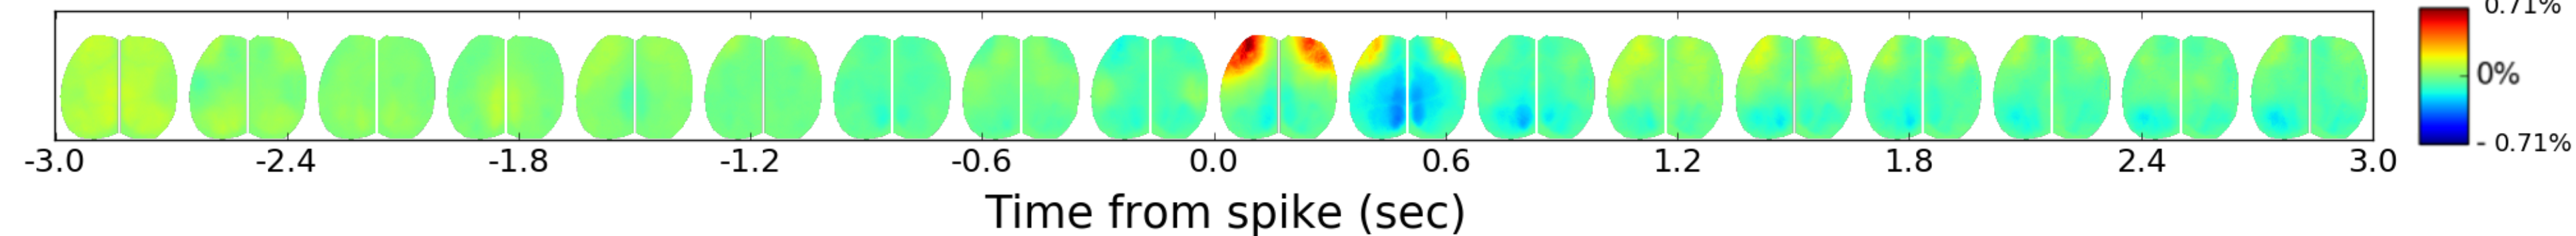

Time Course of  $\Delta F/F$   
(Left Hemisphere Barrel Cortex)

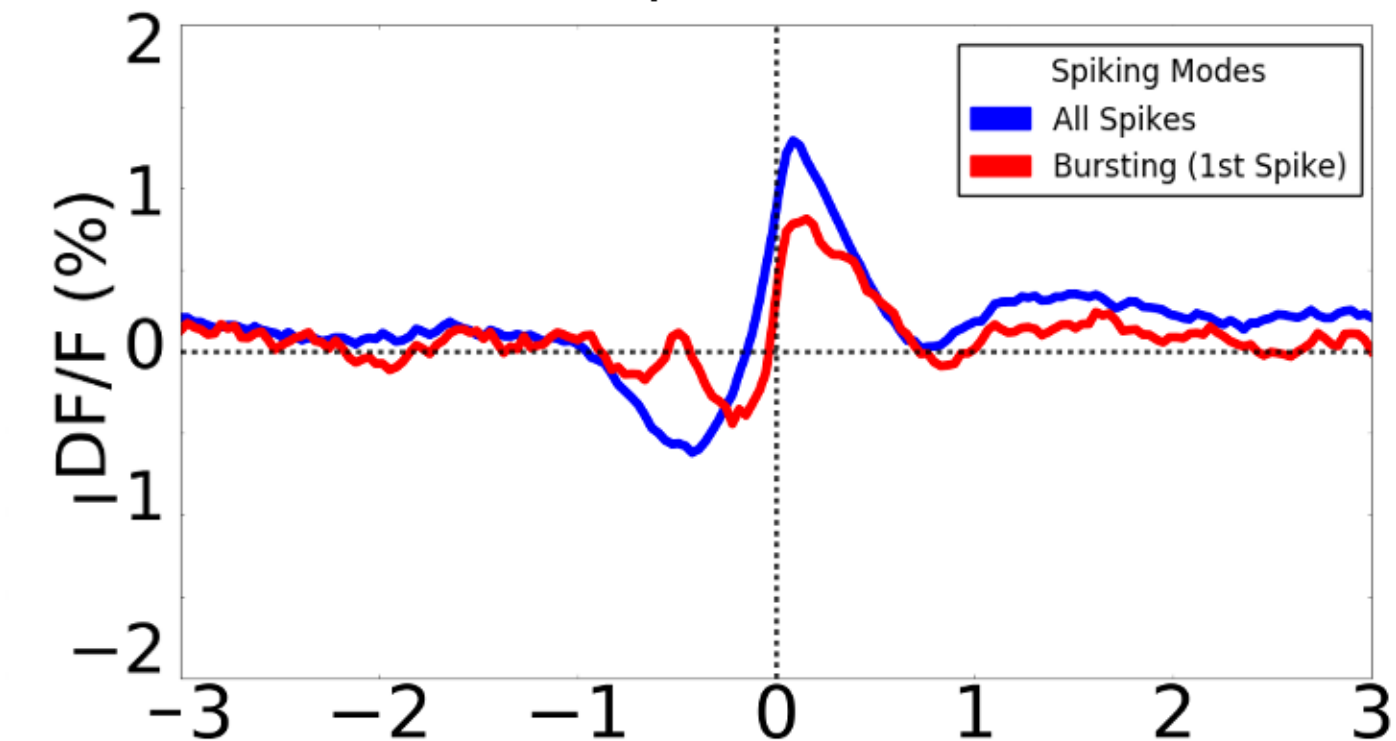

All

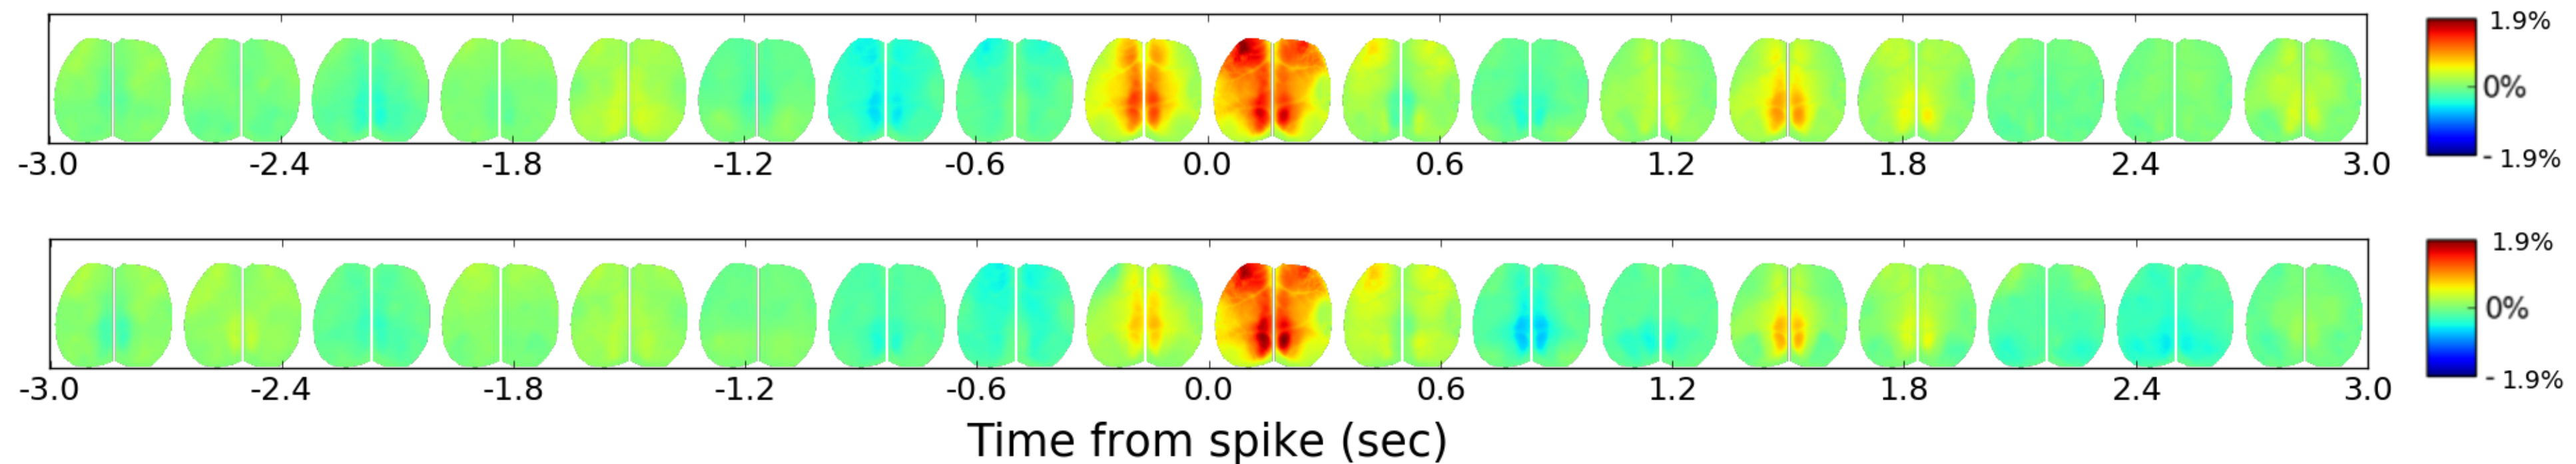

Bursting

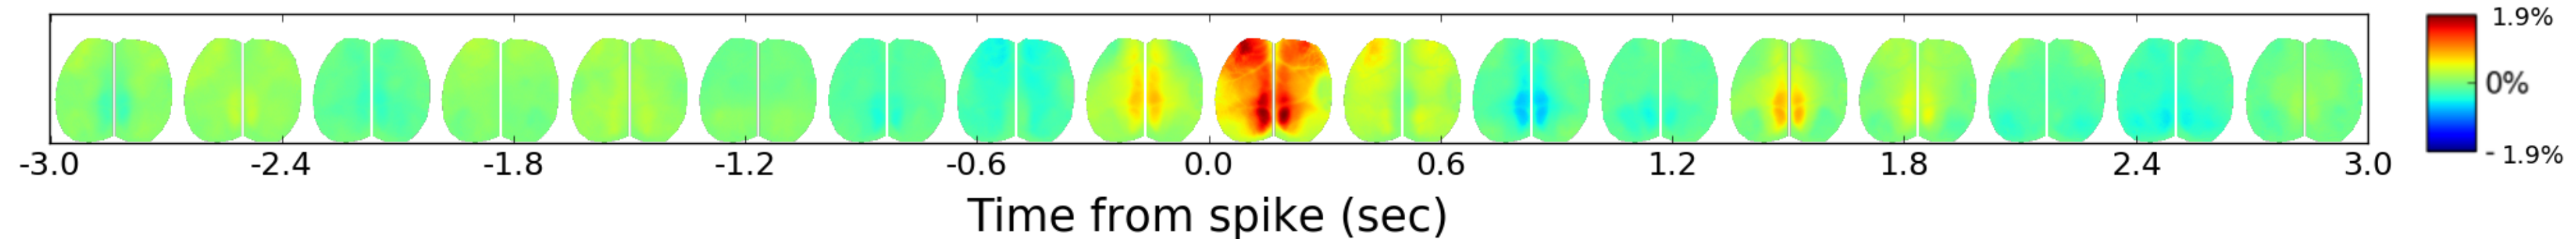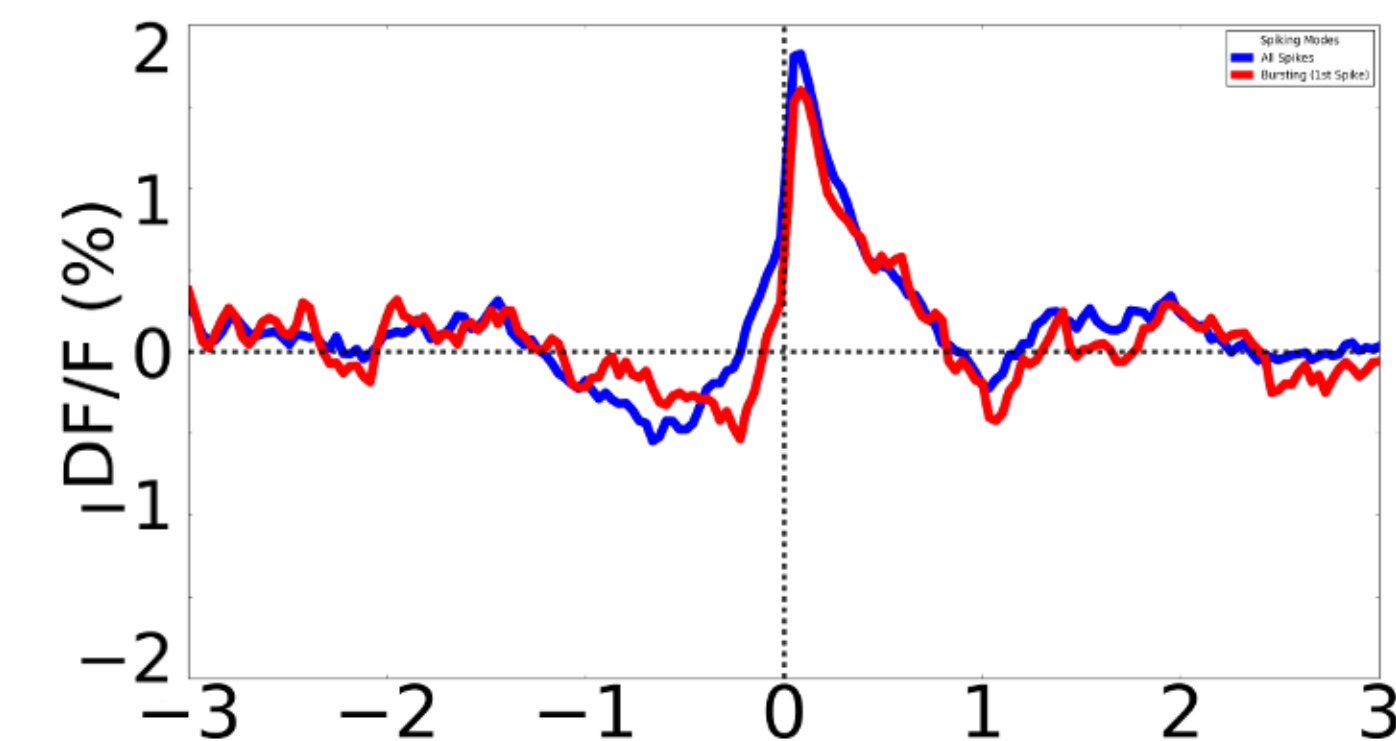

All

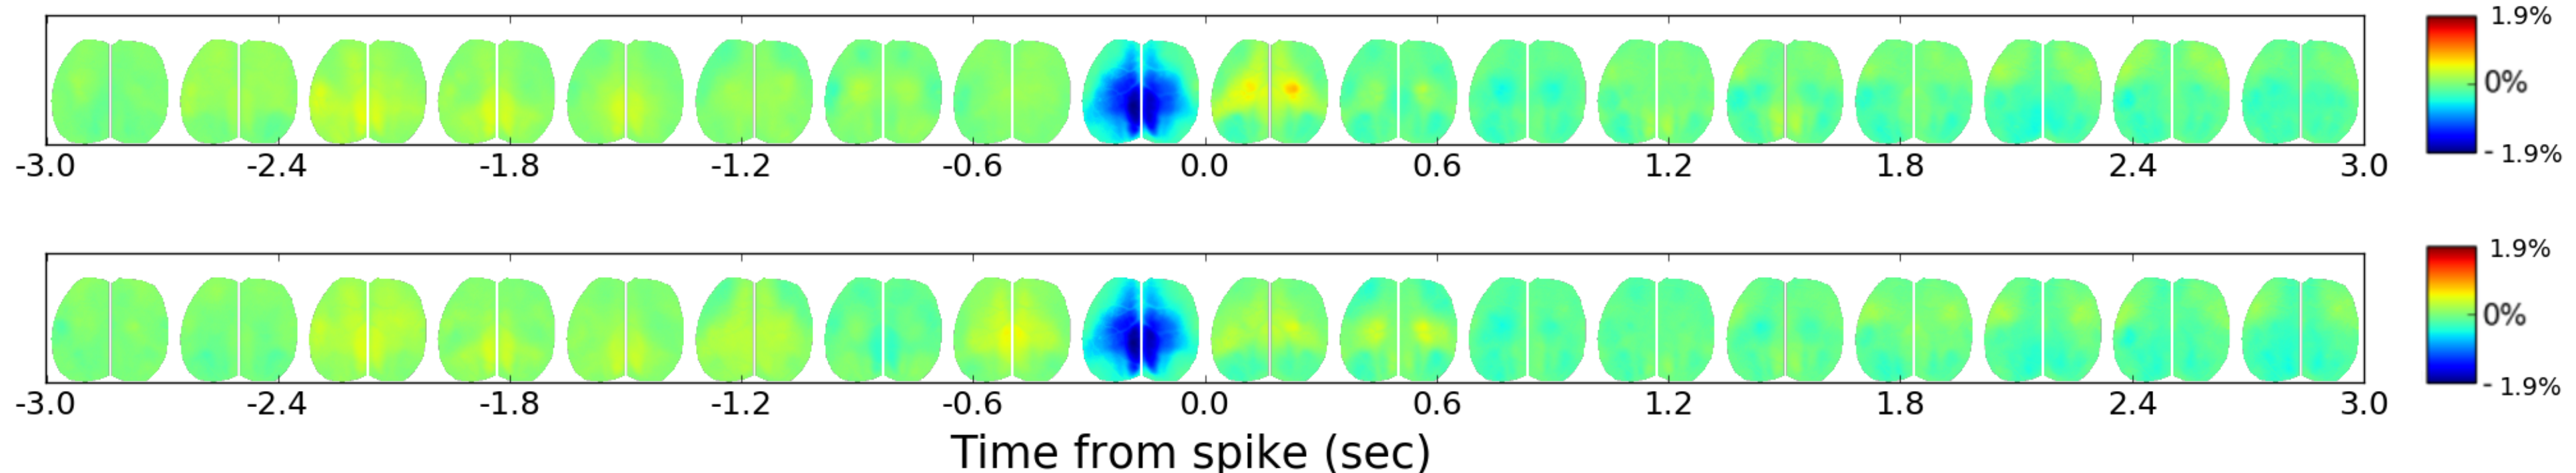

Bursting

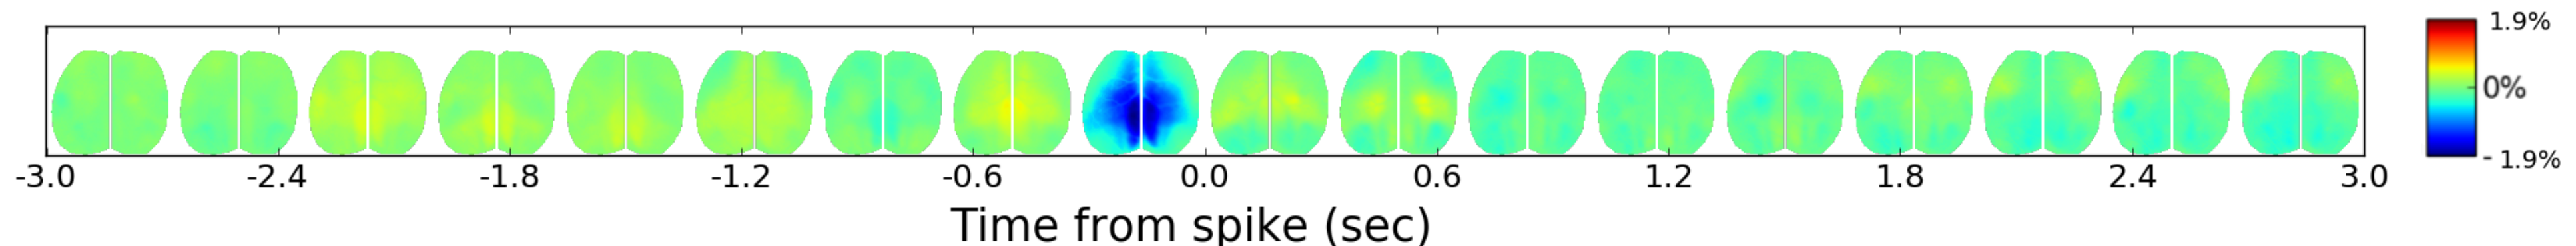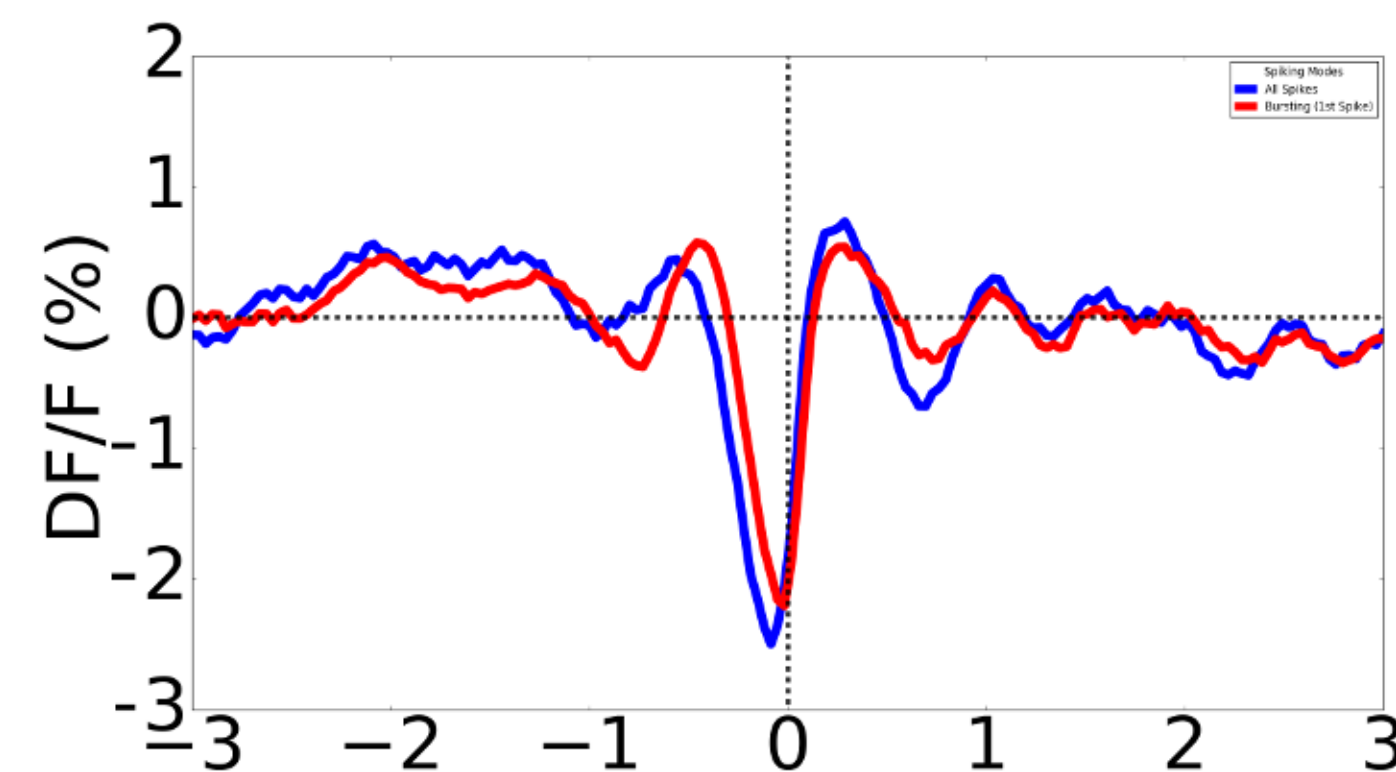

Supplement: supp [file elife_poa_e19976_Figure_6_figure_supplement_3.pdf › elife_poa_e19976_Figure_6_figure_supplement_3.pdf]
