# Supplementary material for: Mapping cortical mesoscopic networks of single spiking cortical or sub-cortical neurons
Source: eLife journal article supplement (doi:10.7554/elife.19976), 2017-02-04
Supplement: supp [file elife_poa_e19976_Figure_6_figure_supplement_4.pdf › elife_poa_e19976_Figure_6_figure_supplement_4.pdf]

# Single Cell Motifs

## Single Event STMs

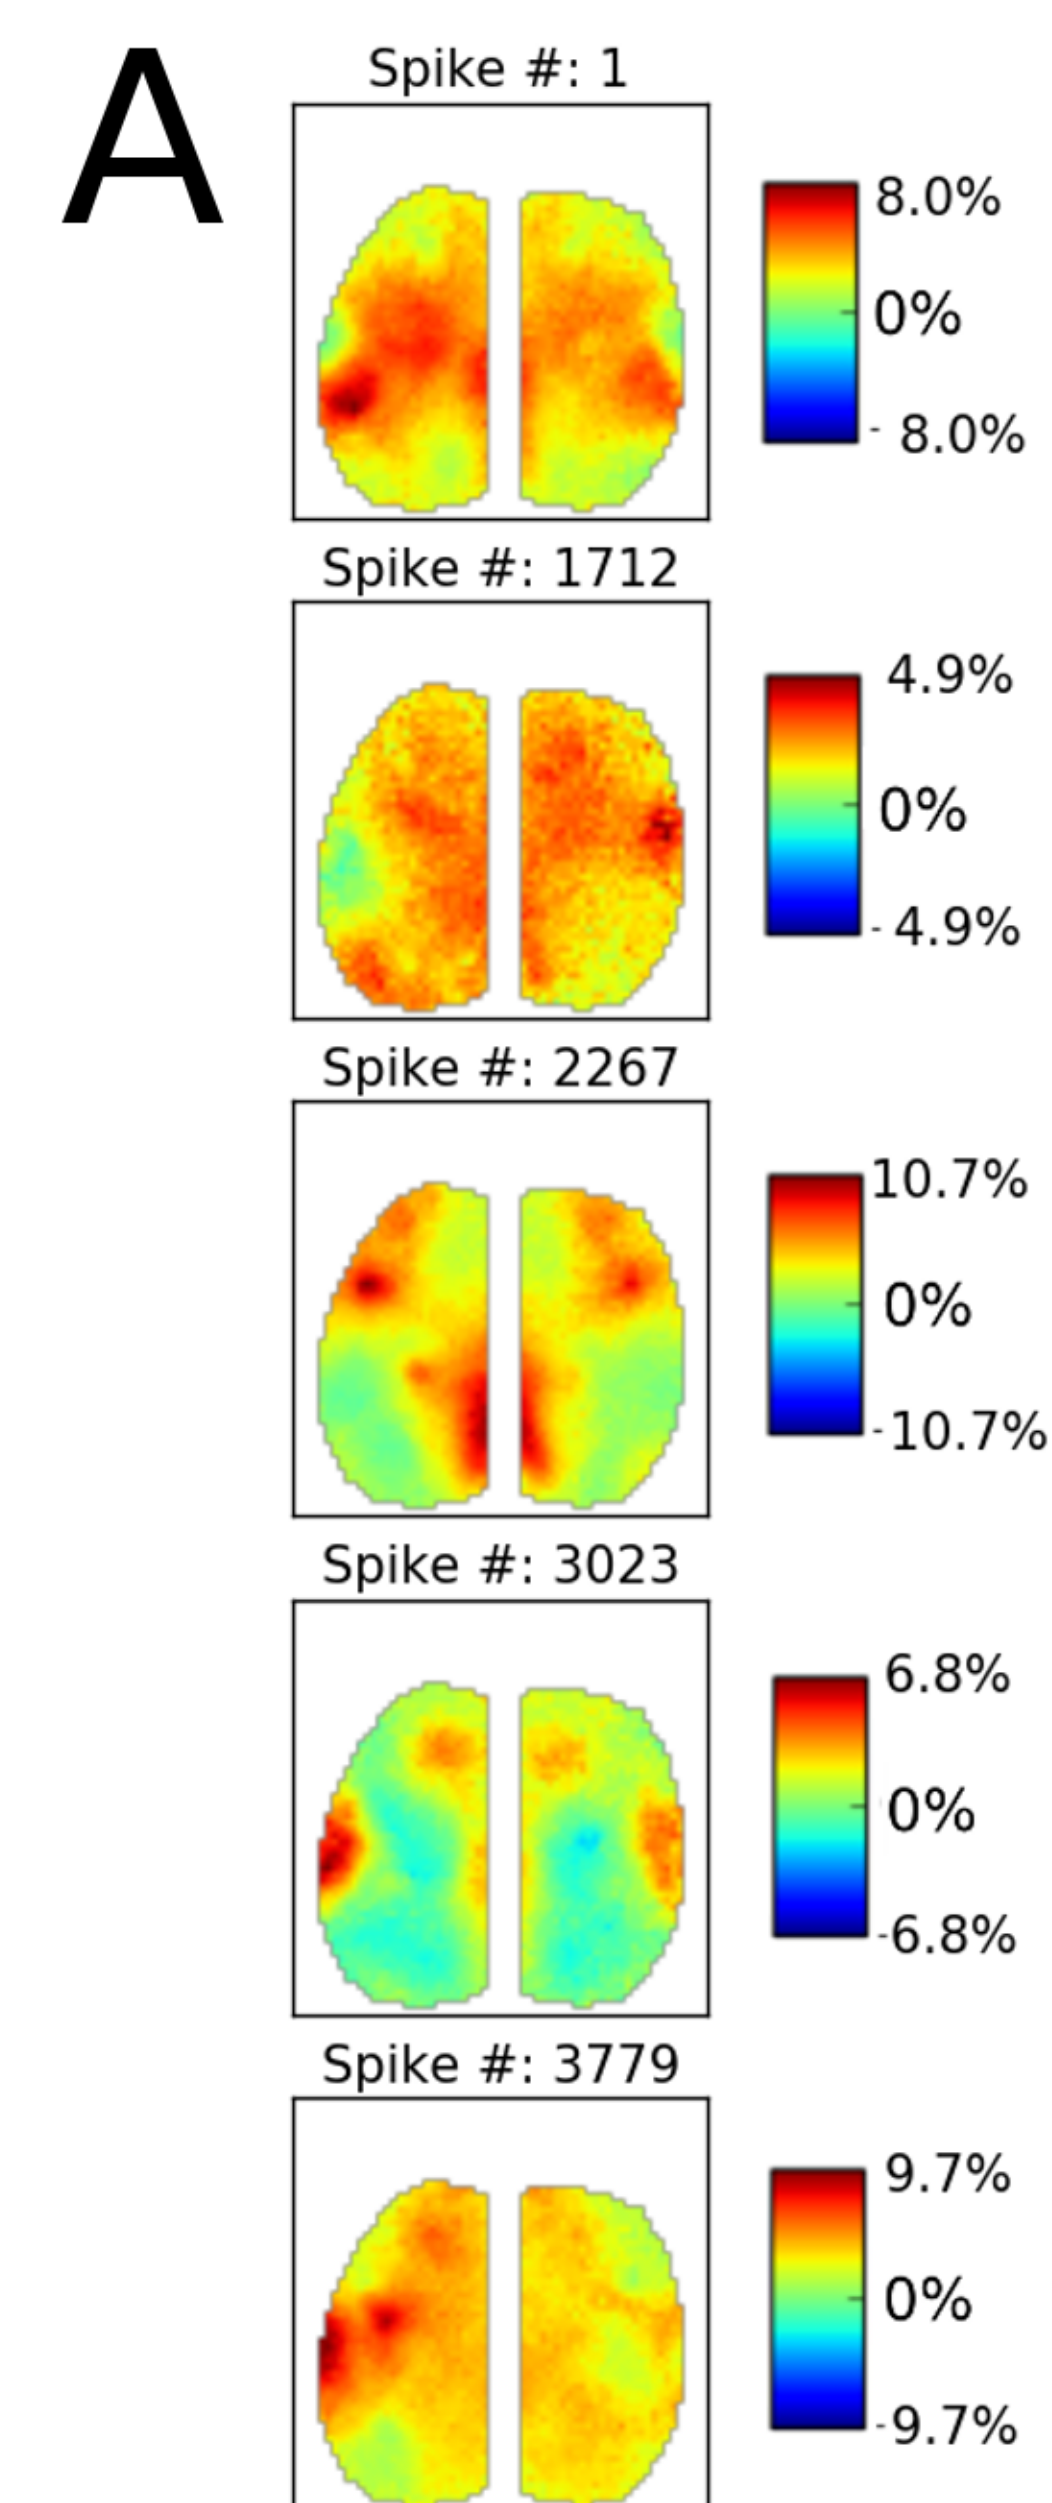

PC1

## STM Distributions 4 Sub-Networks (2D)

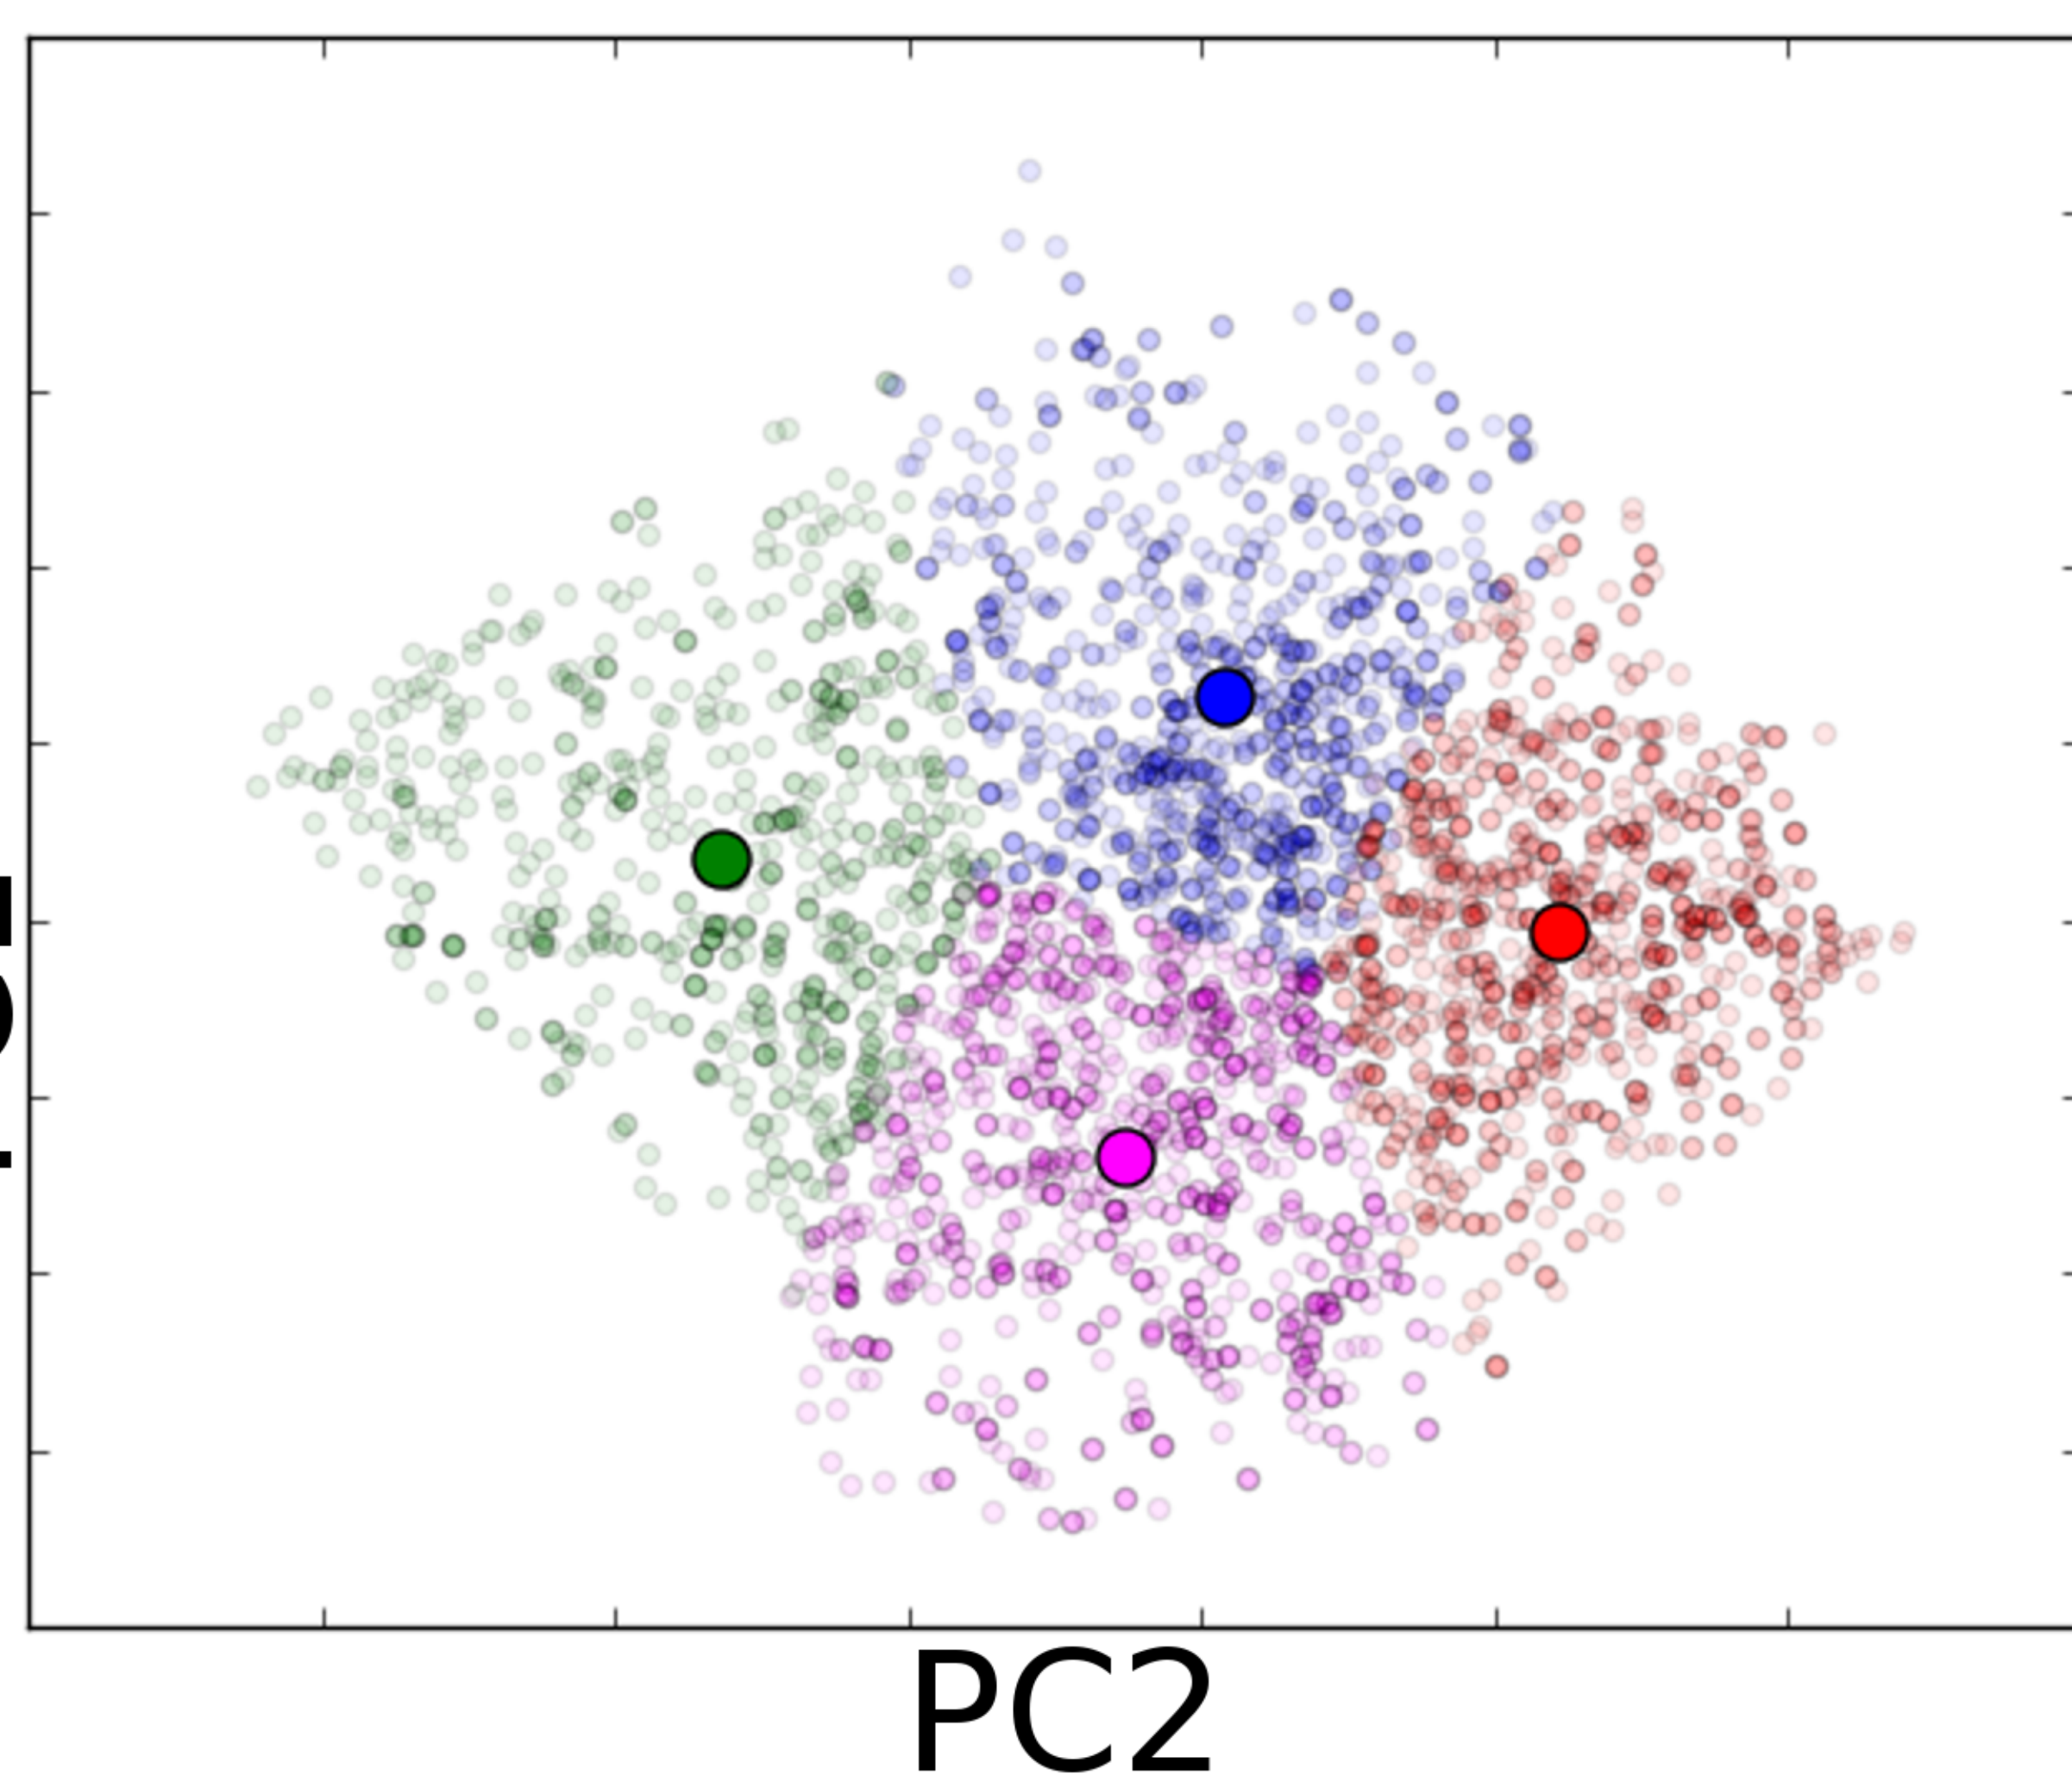

PC2

## Sub-Network Centres

PC1

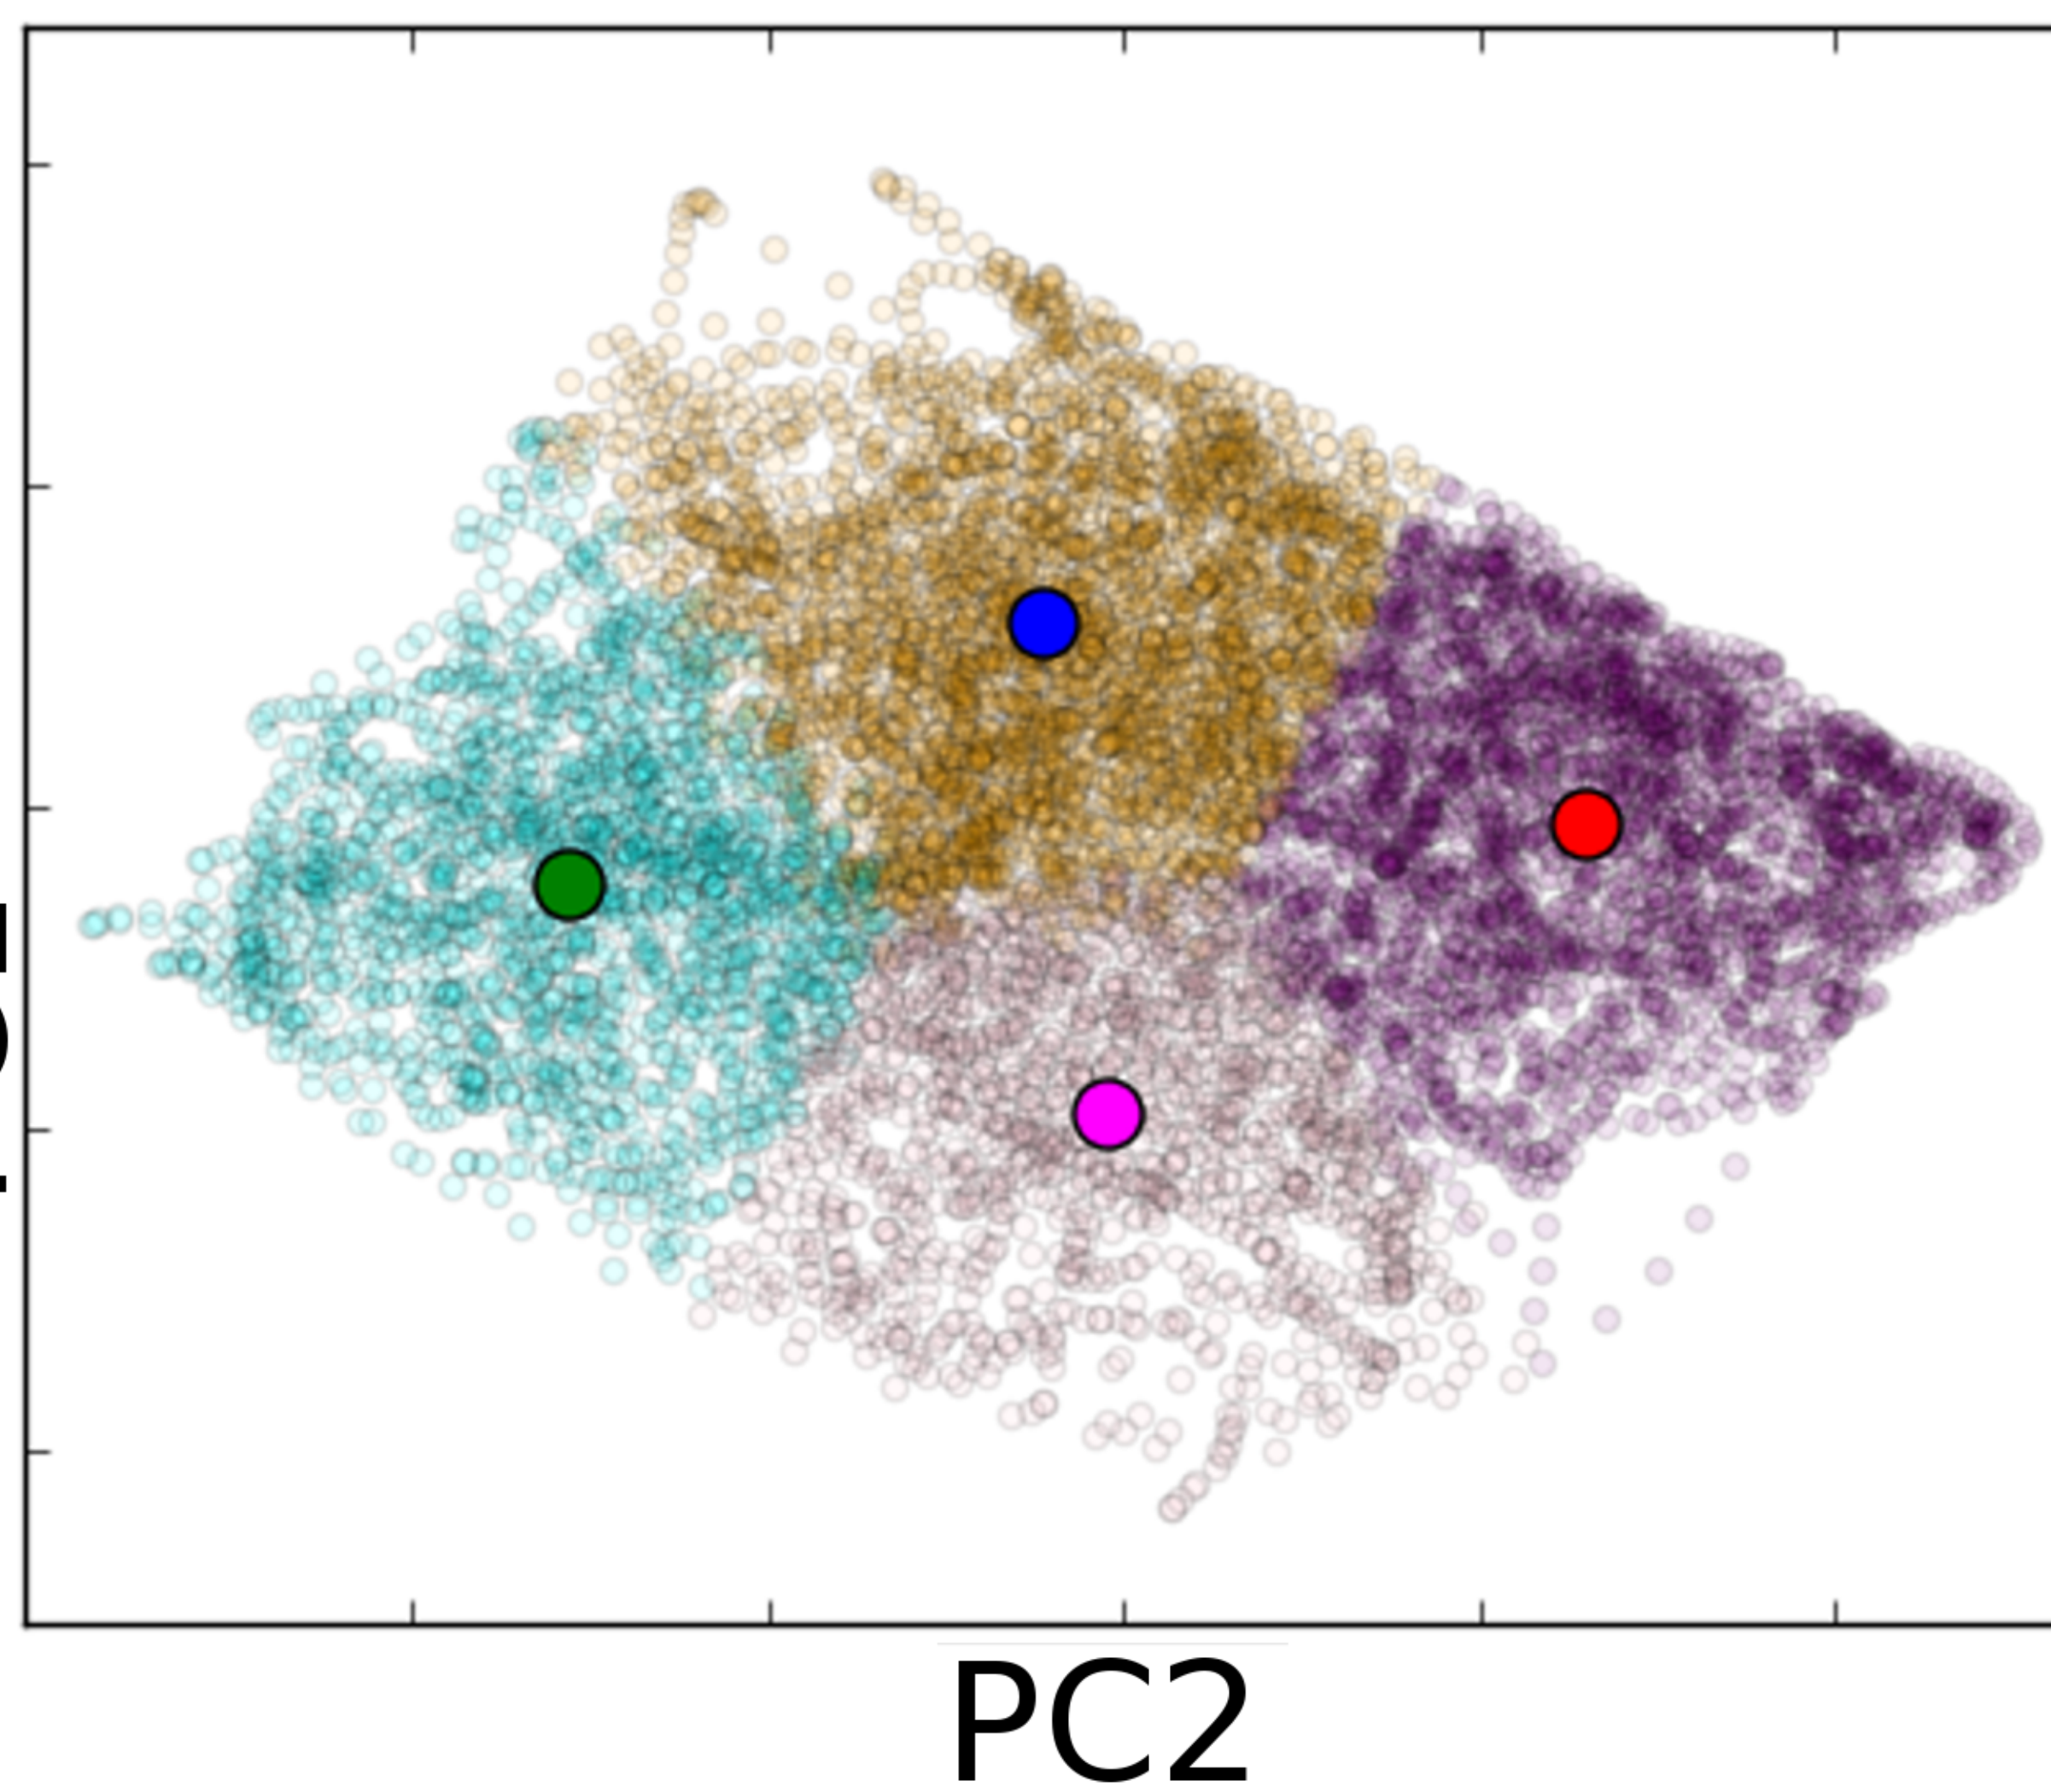

PC2

## Sub-Network Rasters

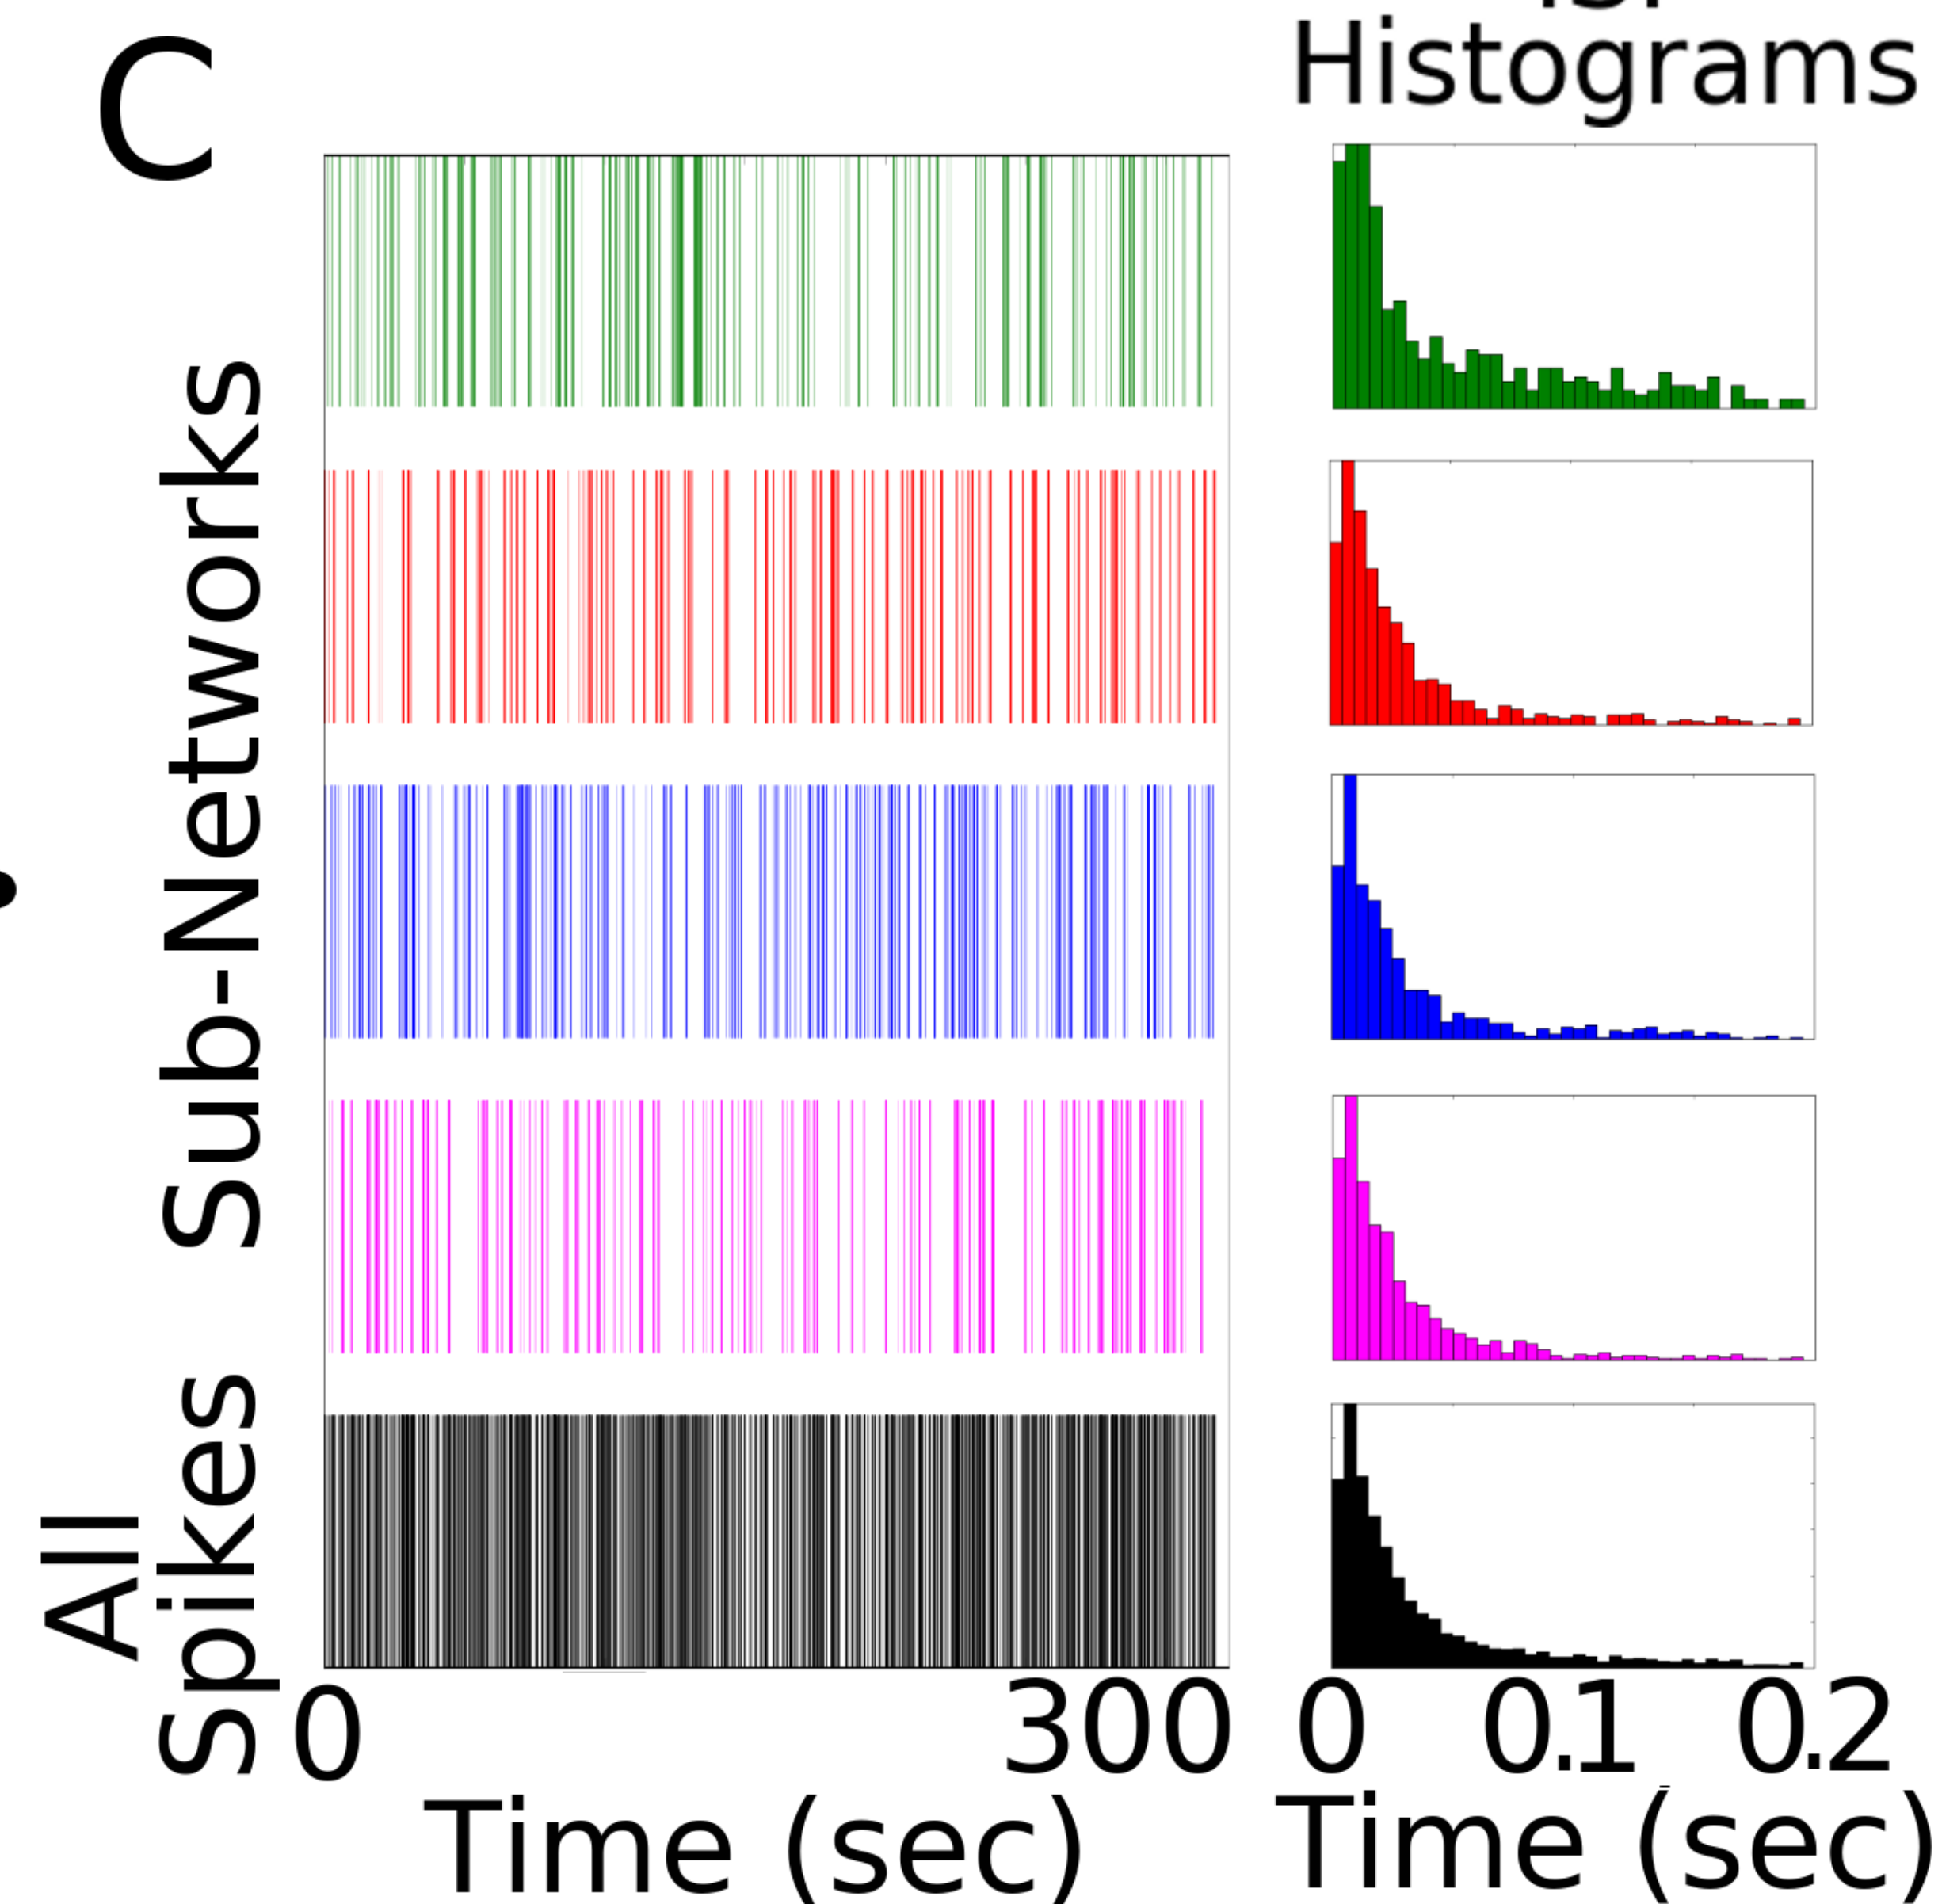

## Sub-Network STMs

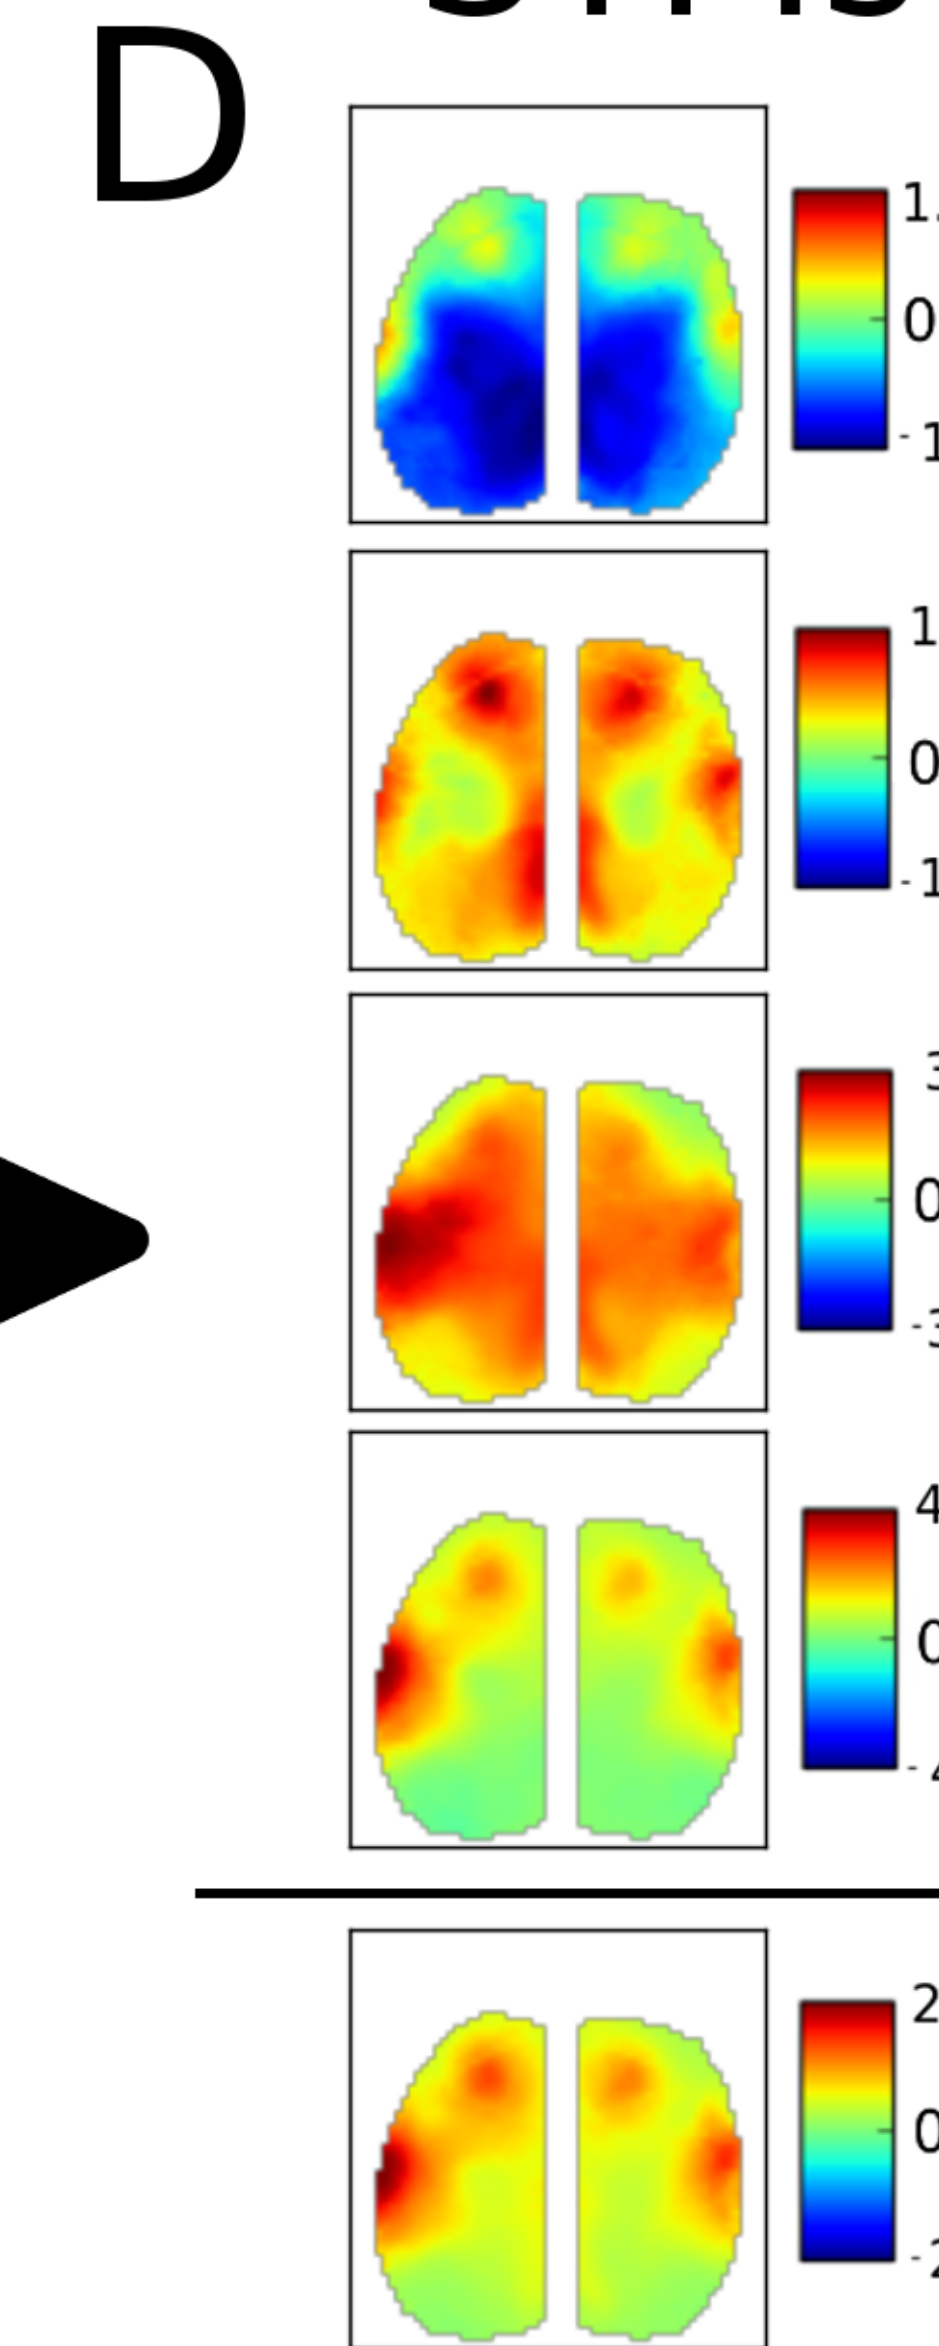

## Single Cell Contributions to Sub-Networks

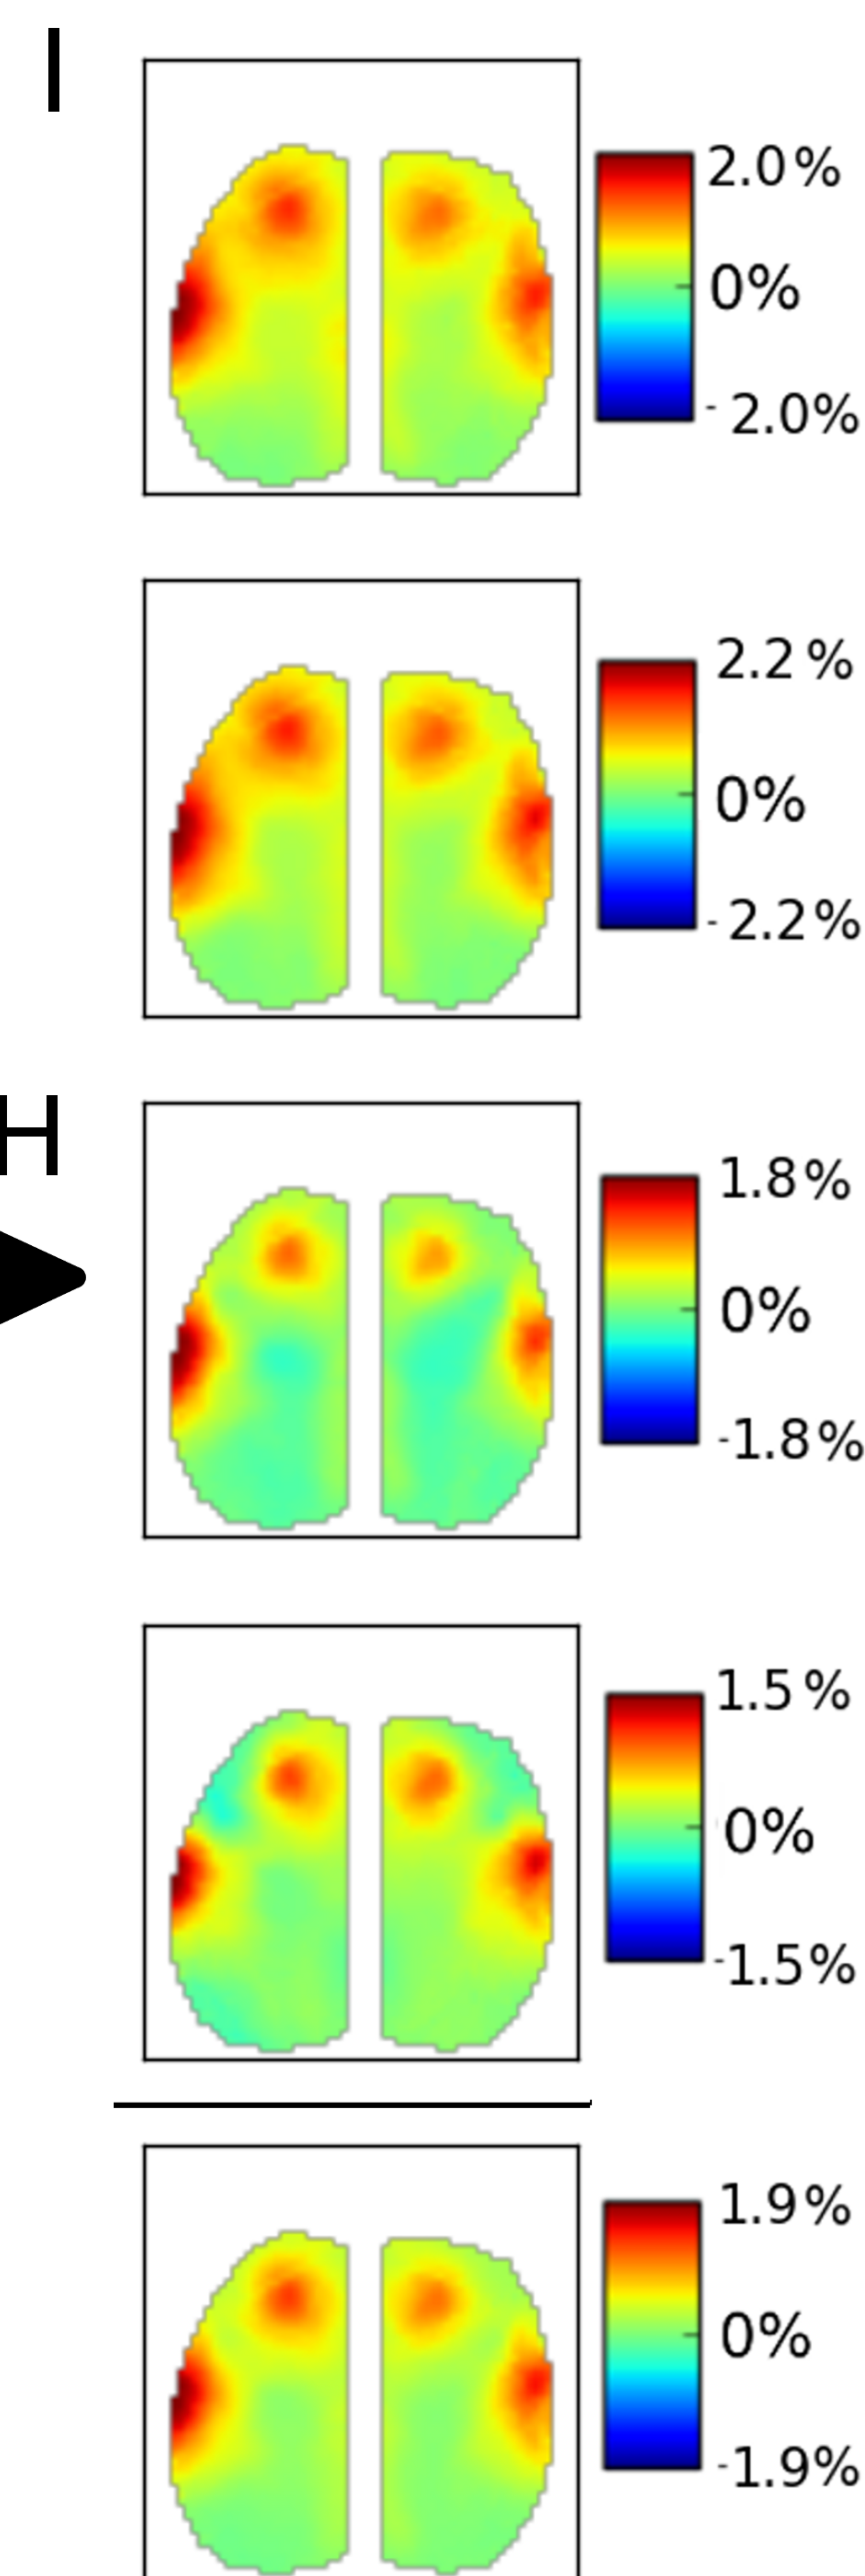

# Spontaneous Motifs

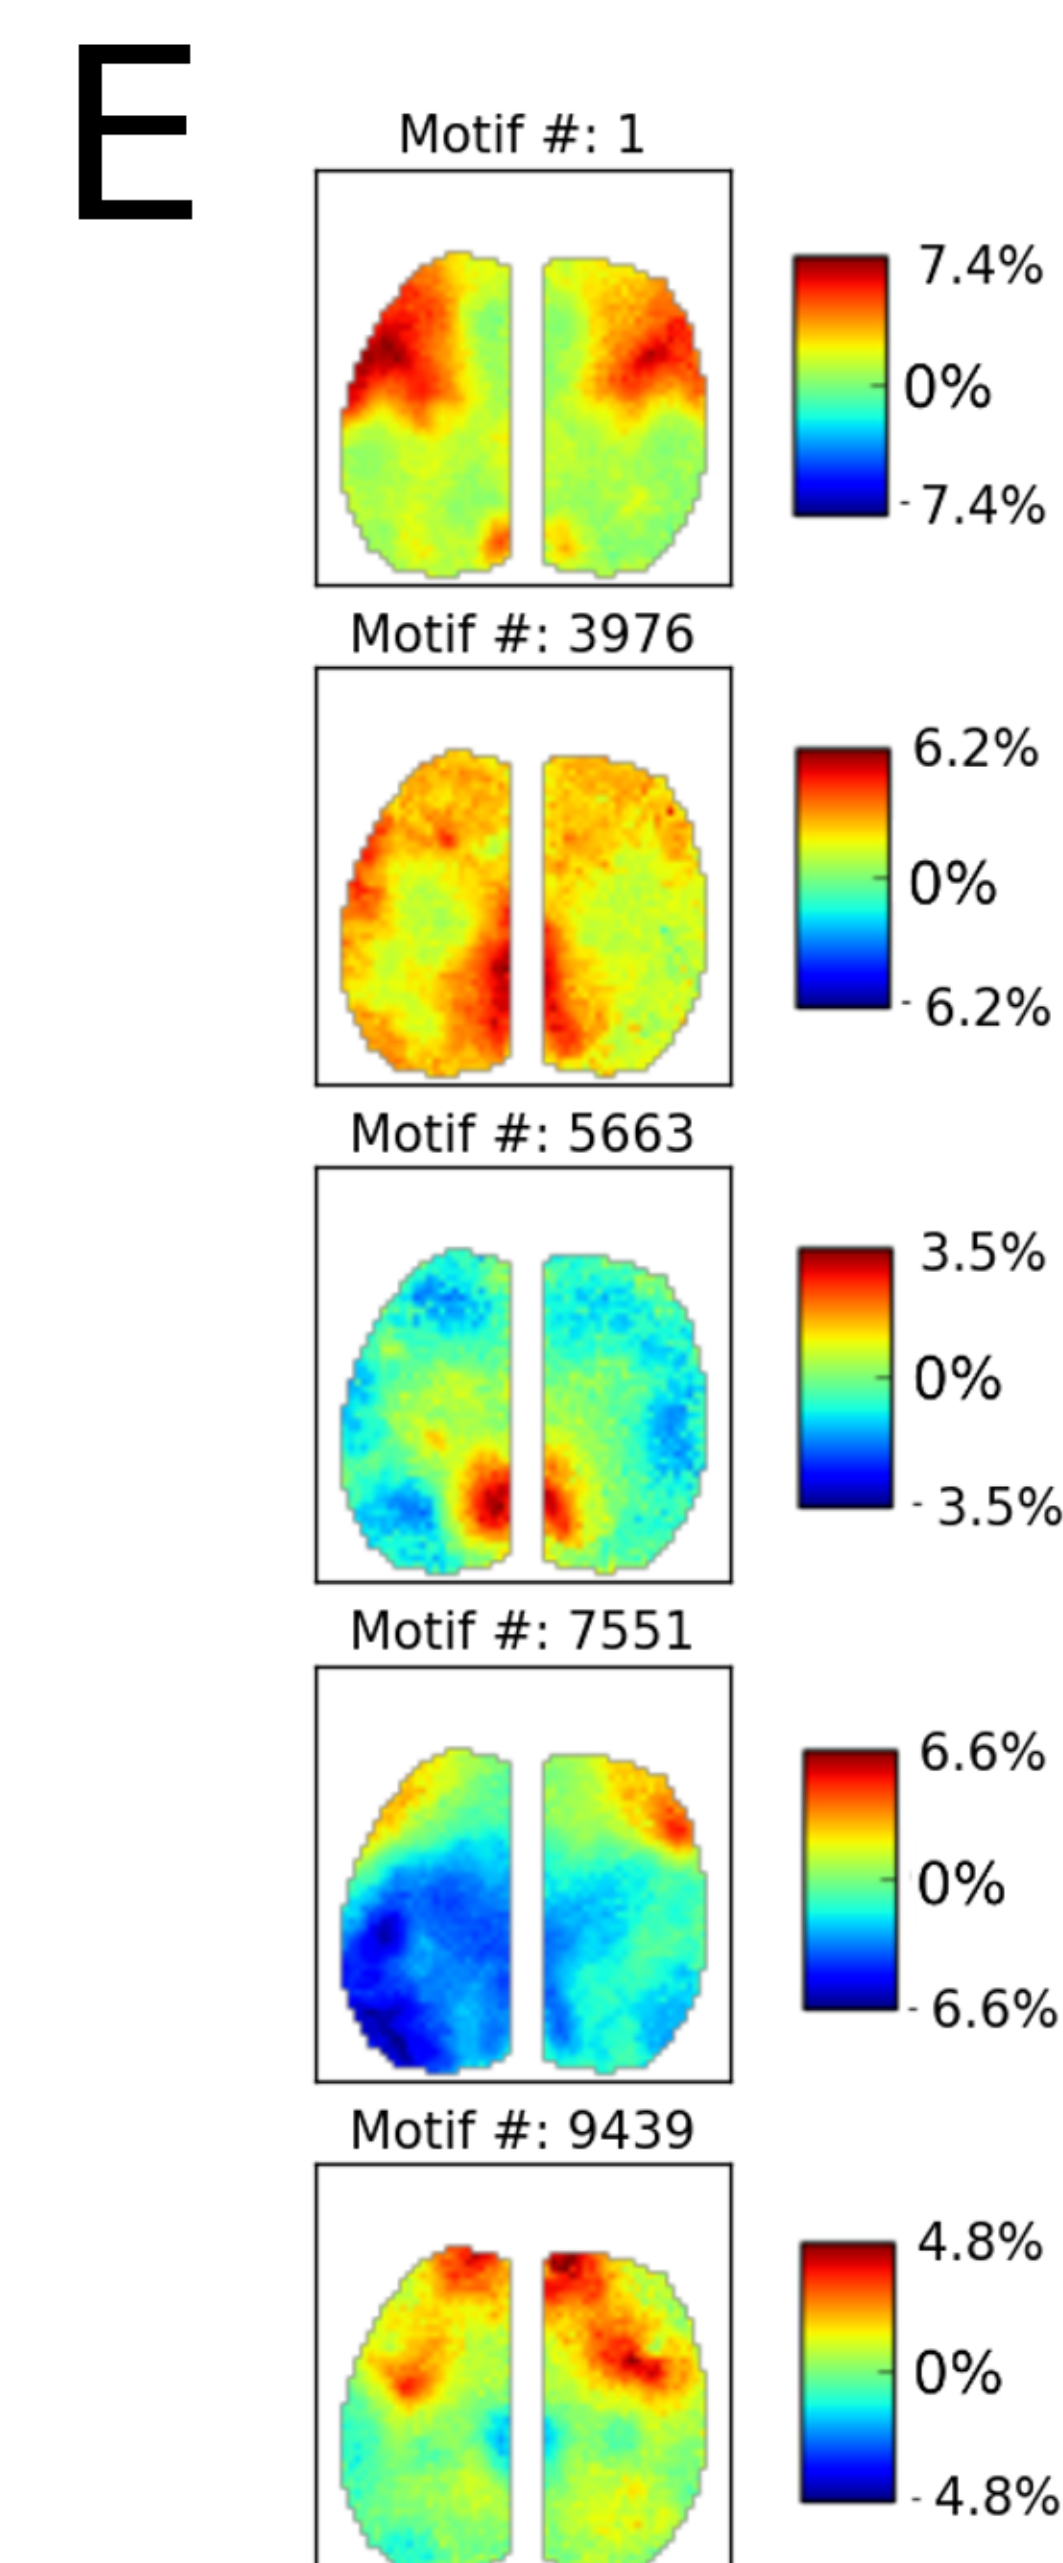

PC1



PC2

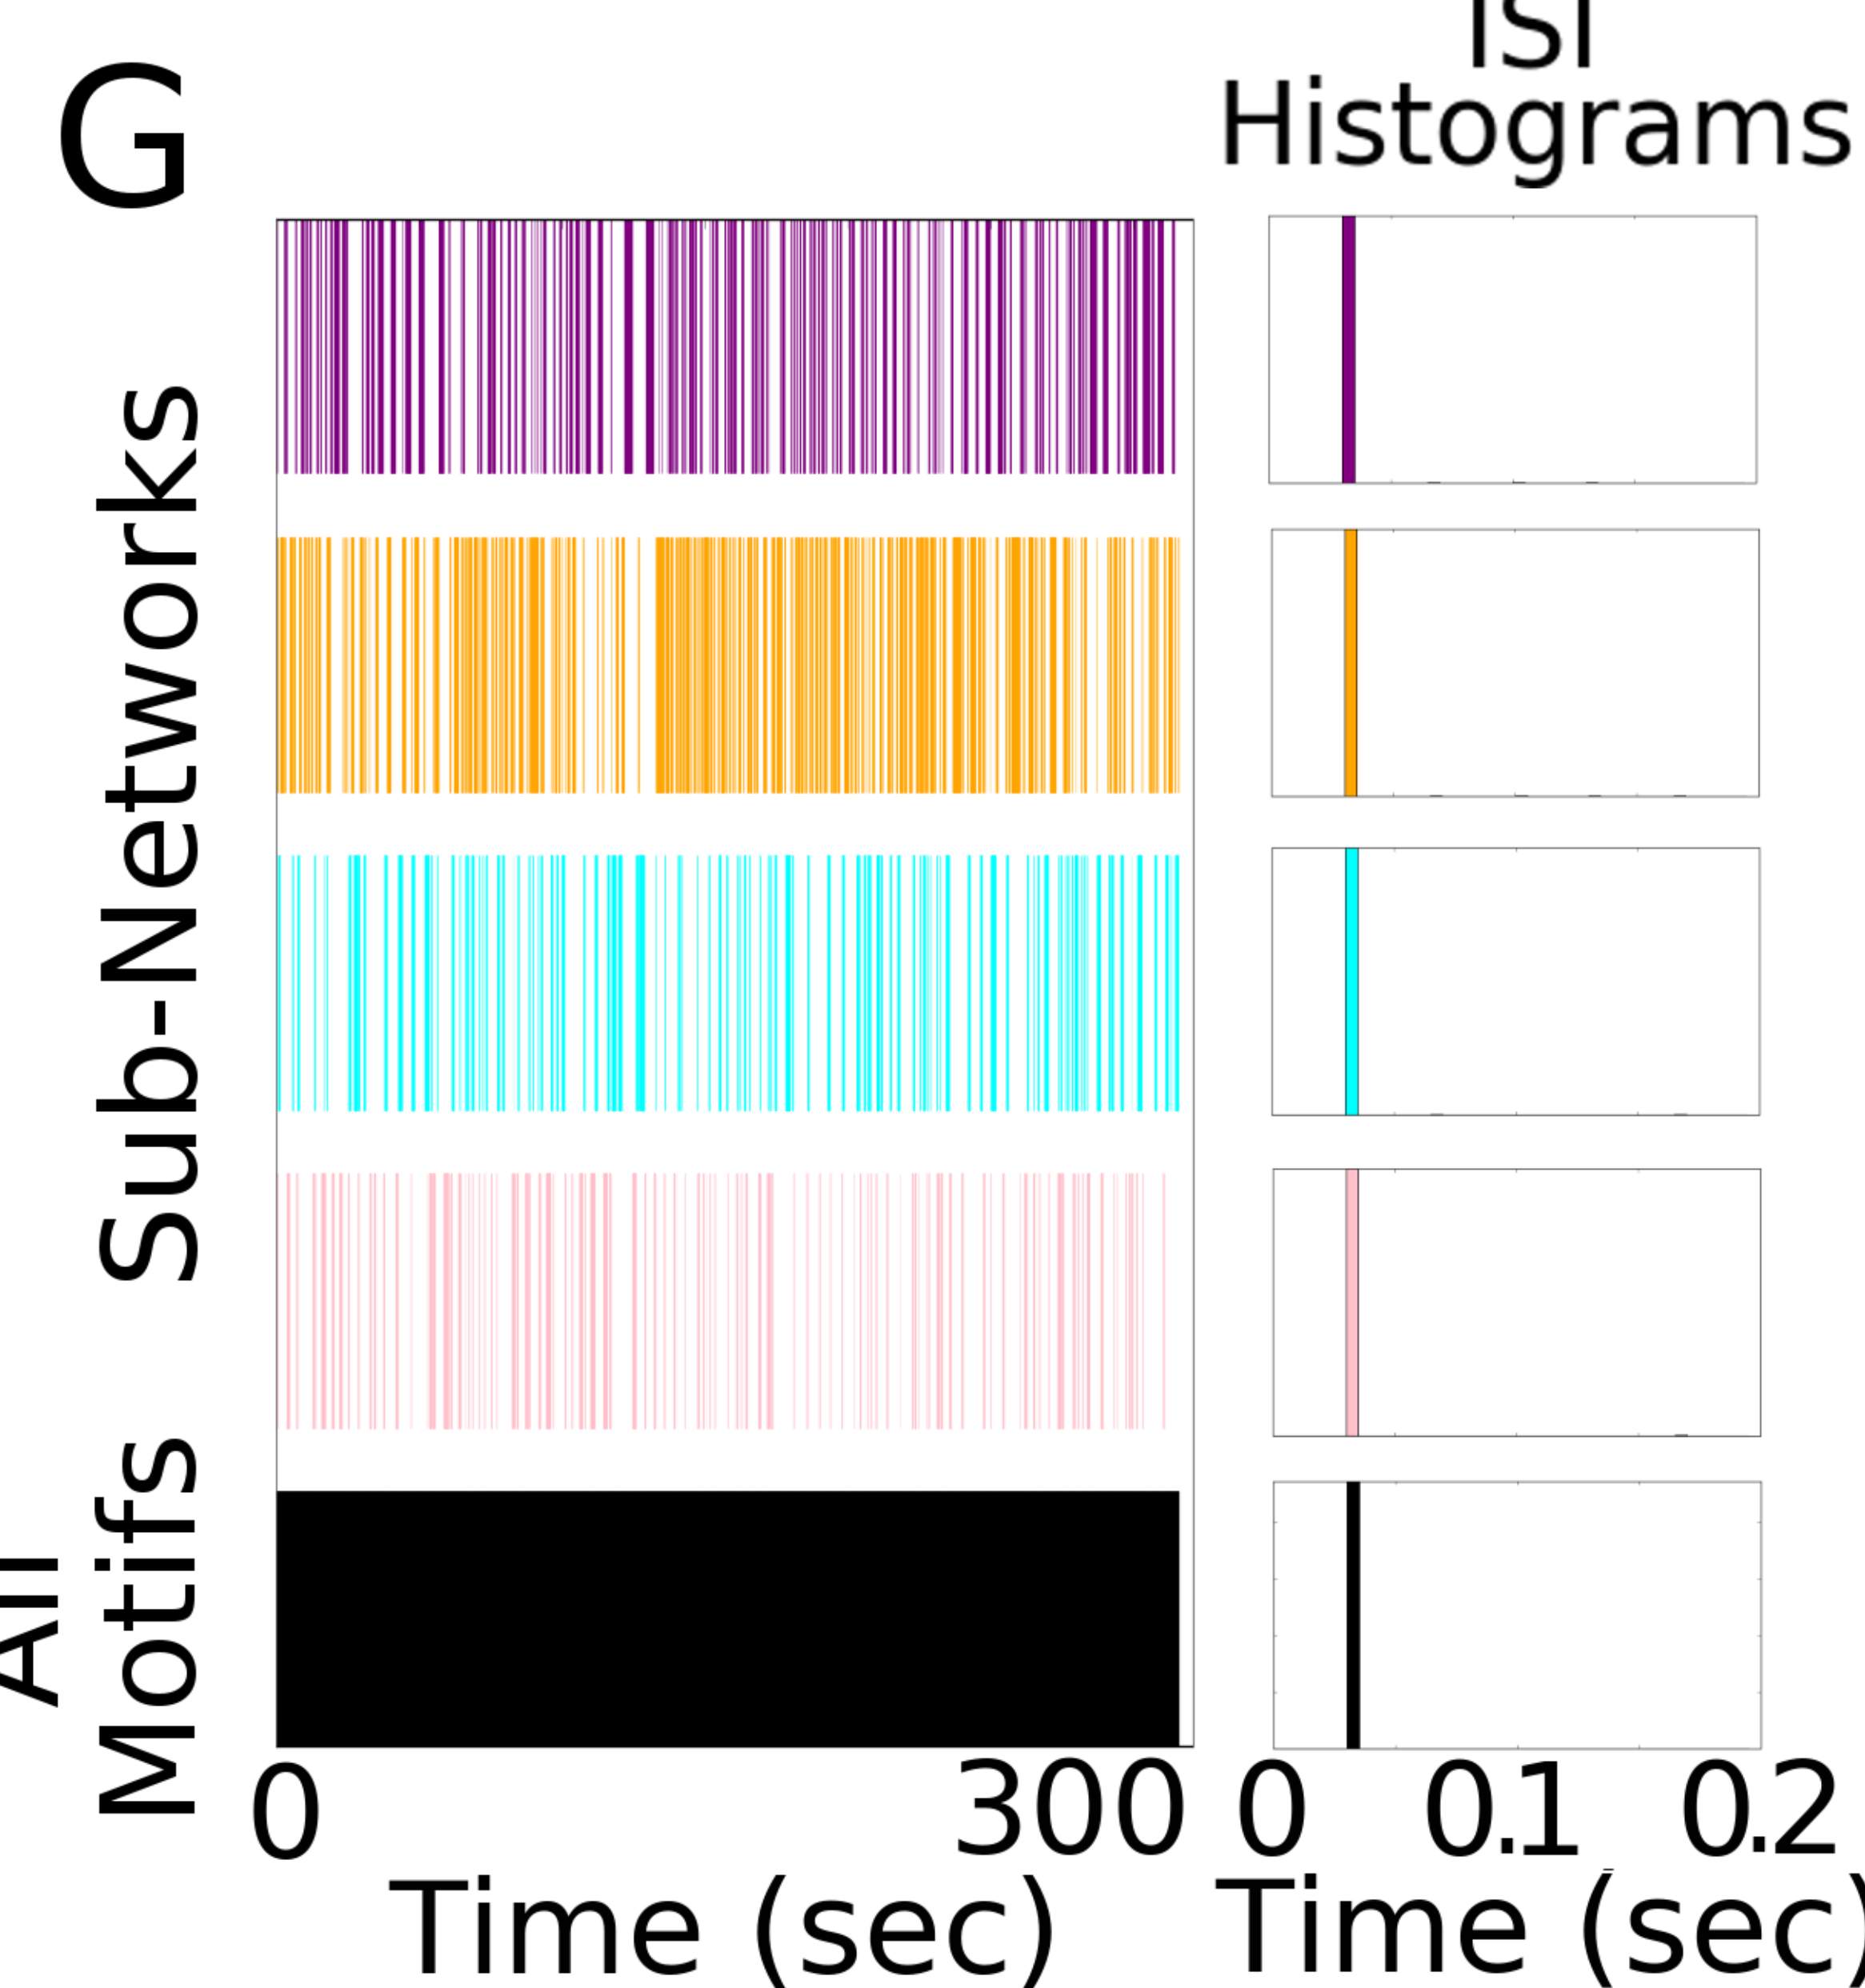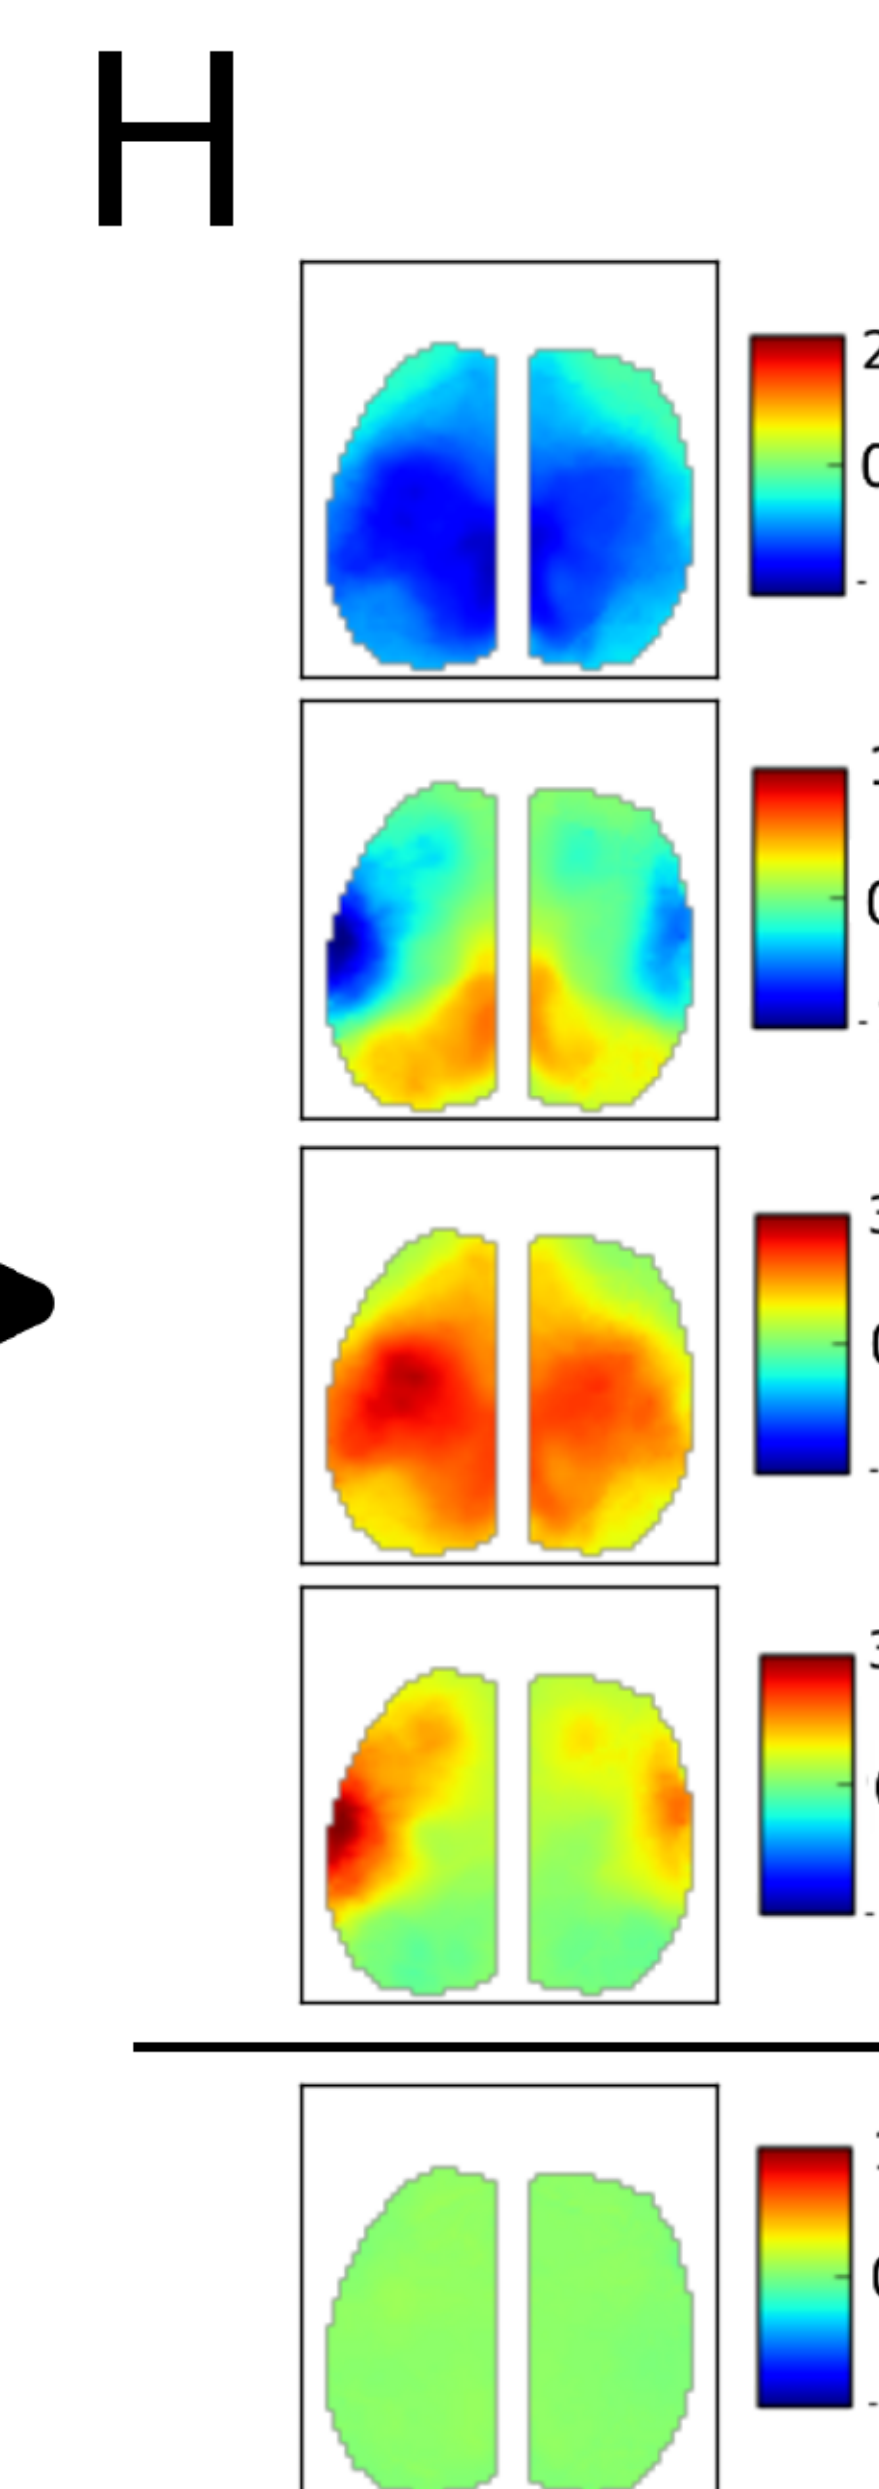

D-H
