# Supplementary material for: Mapping cortical mesoscopic networks of single spiking cortical or sub-cortical neurons
Source: eLife journal article supplement (doi:10.7554/elife.19976), 2017-02-04

Cortical Cell Examples: STMs Stable Across 4 Sub-Networks

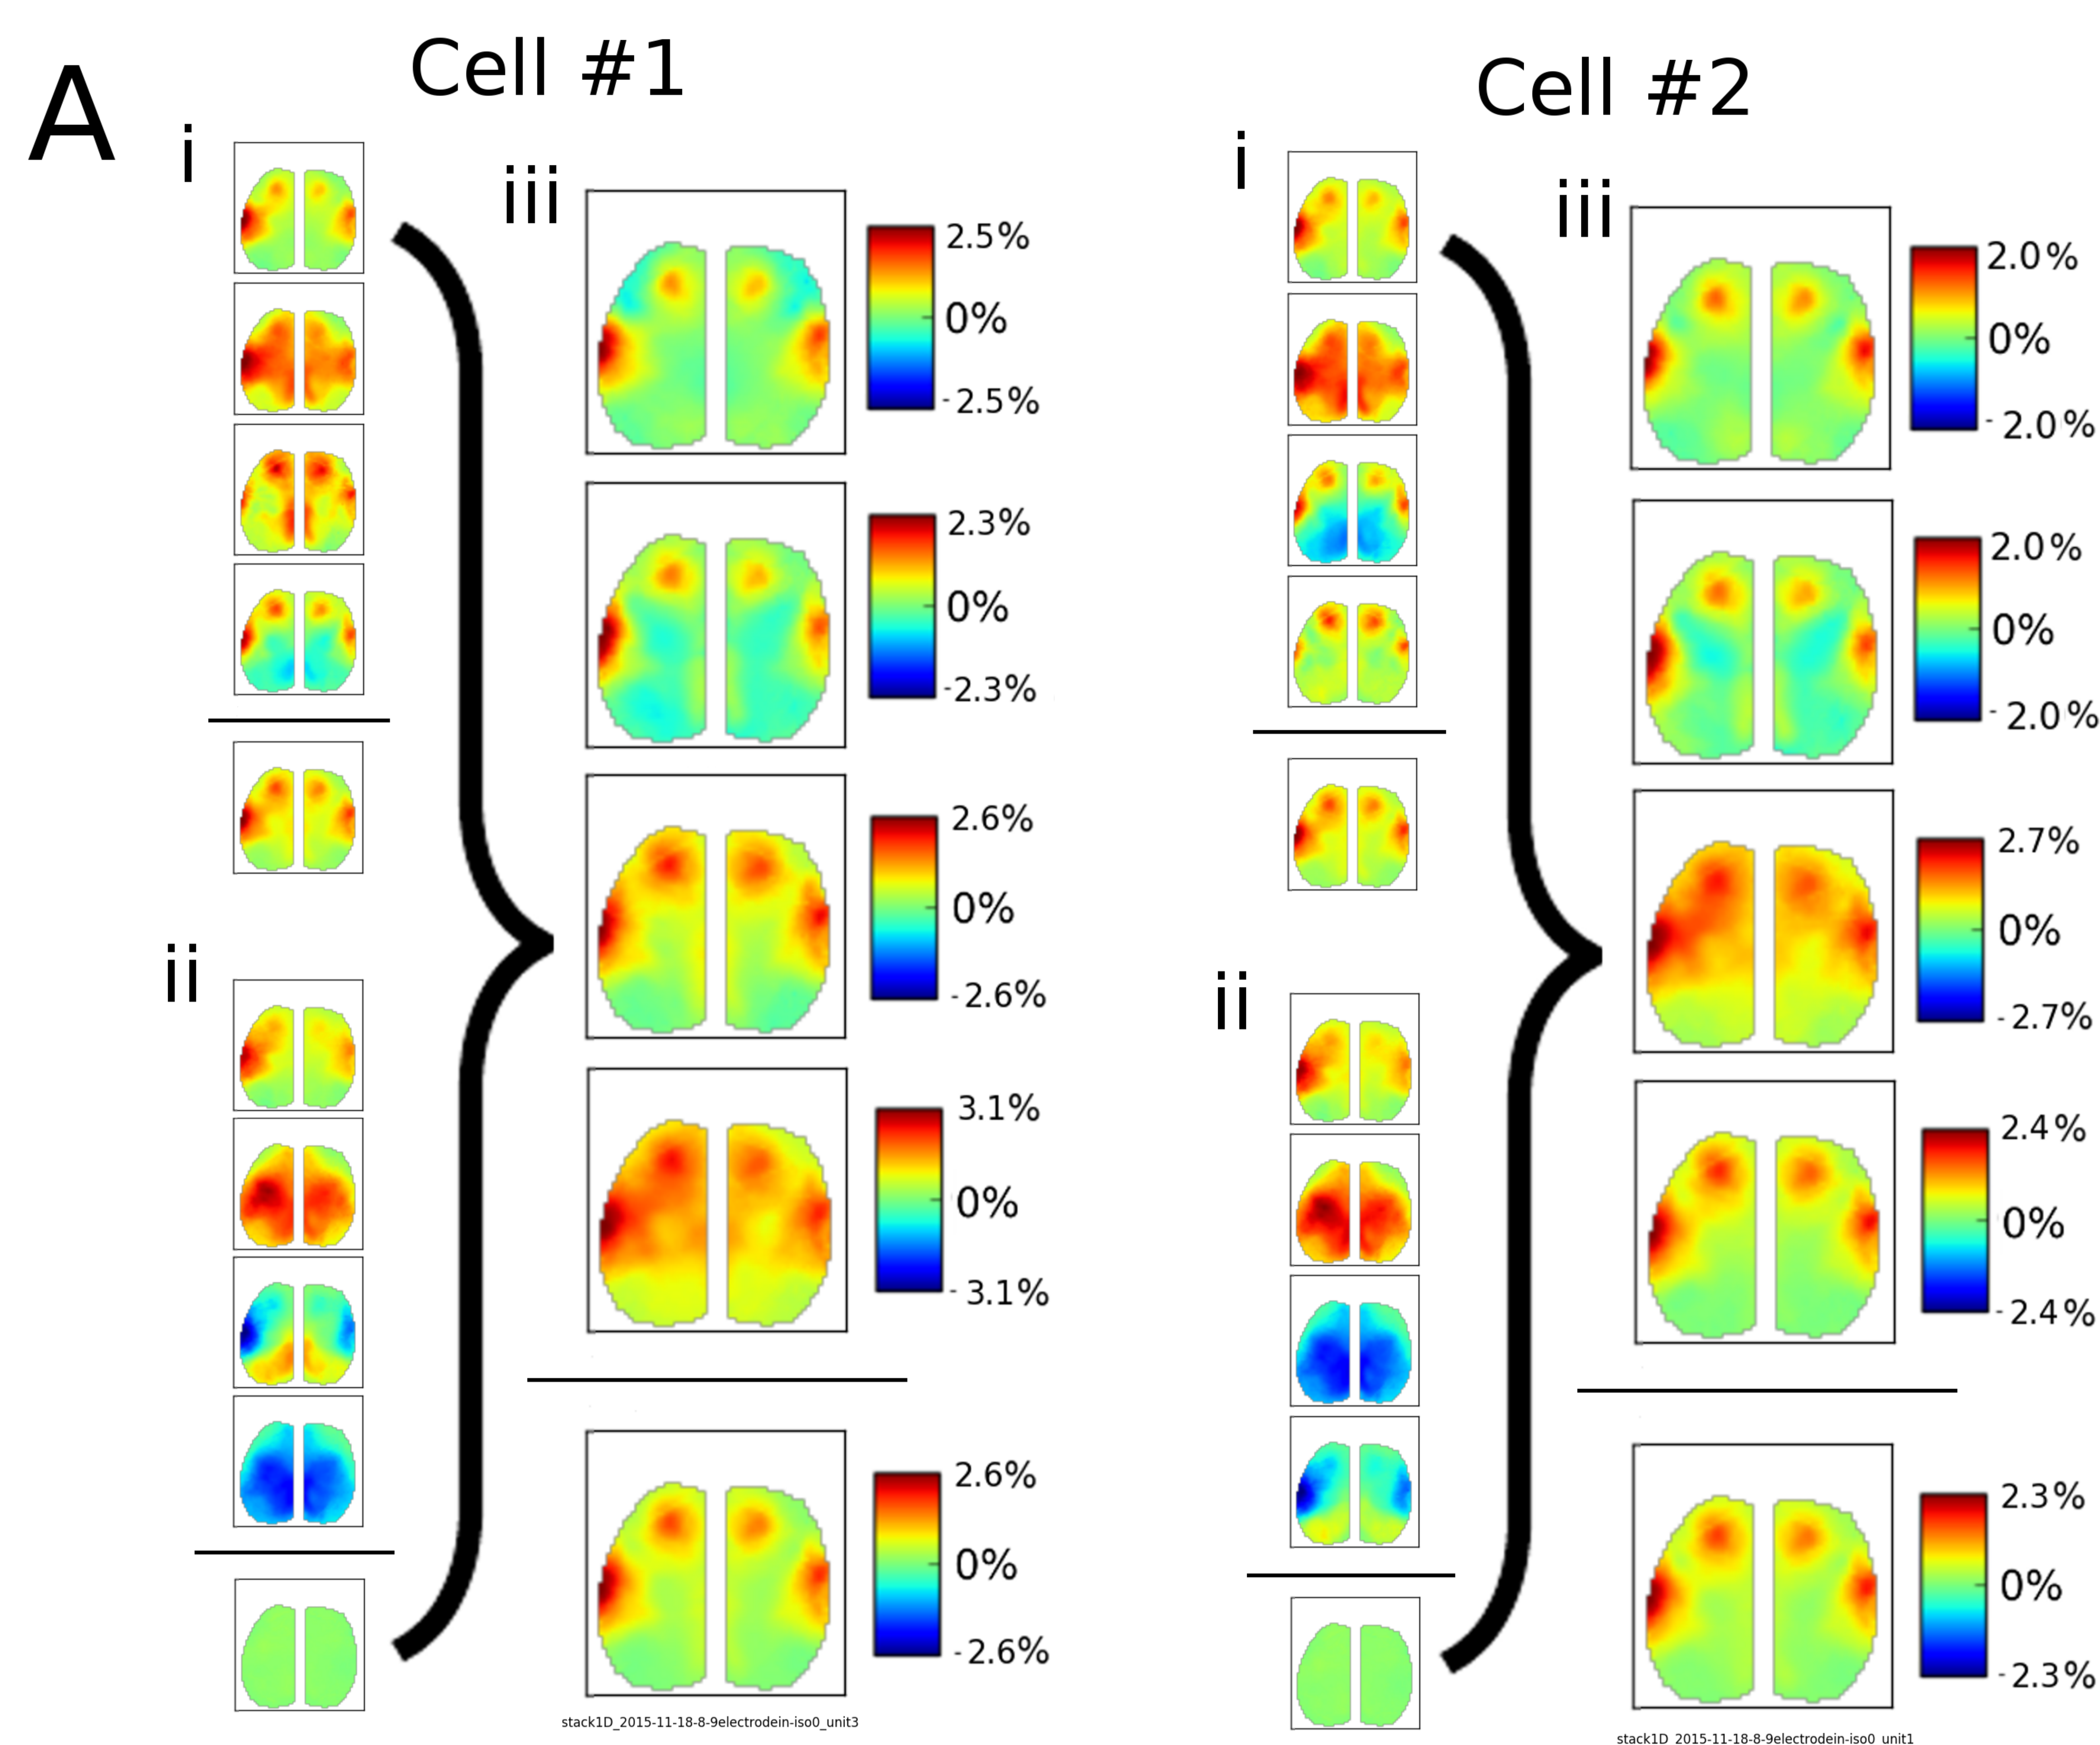

Cortical Cell STM: Stable Across 12 Sub-Networks

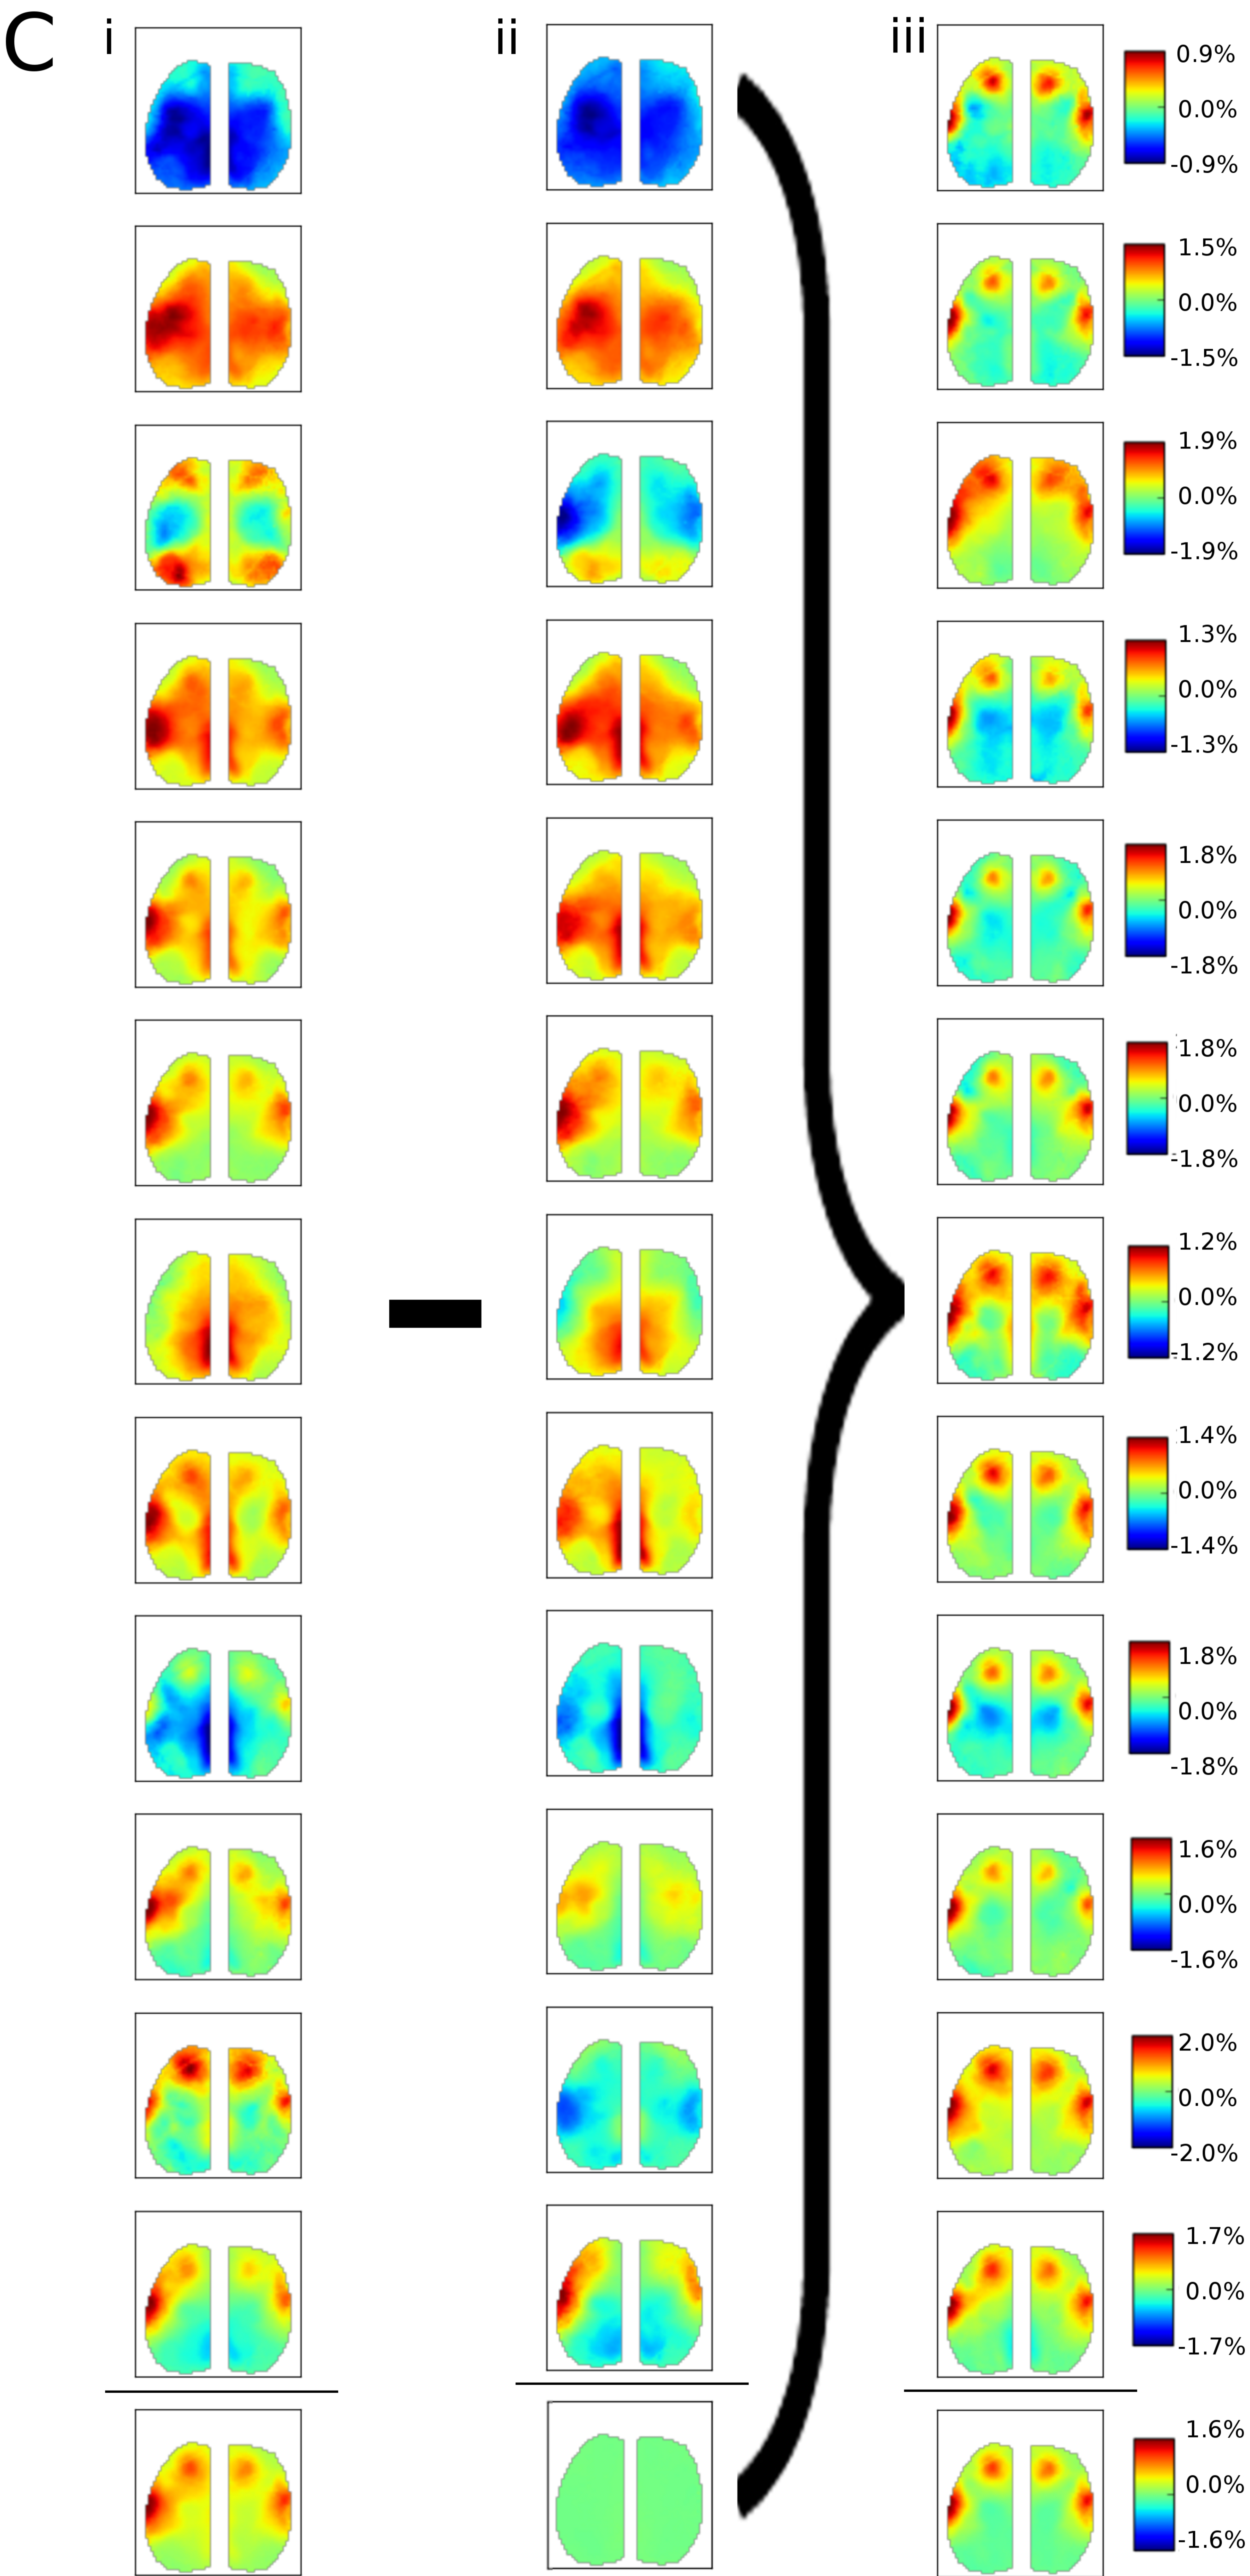

Thalamic Cell Examples: STMs Stable Across 4 Sub-Networks

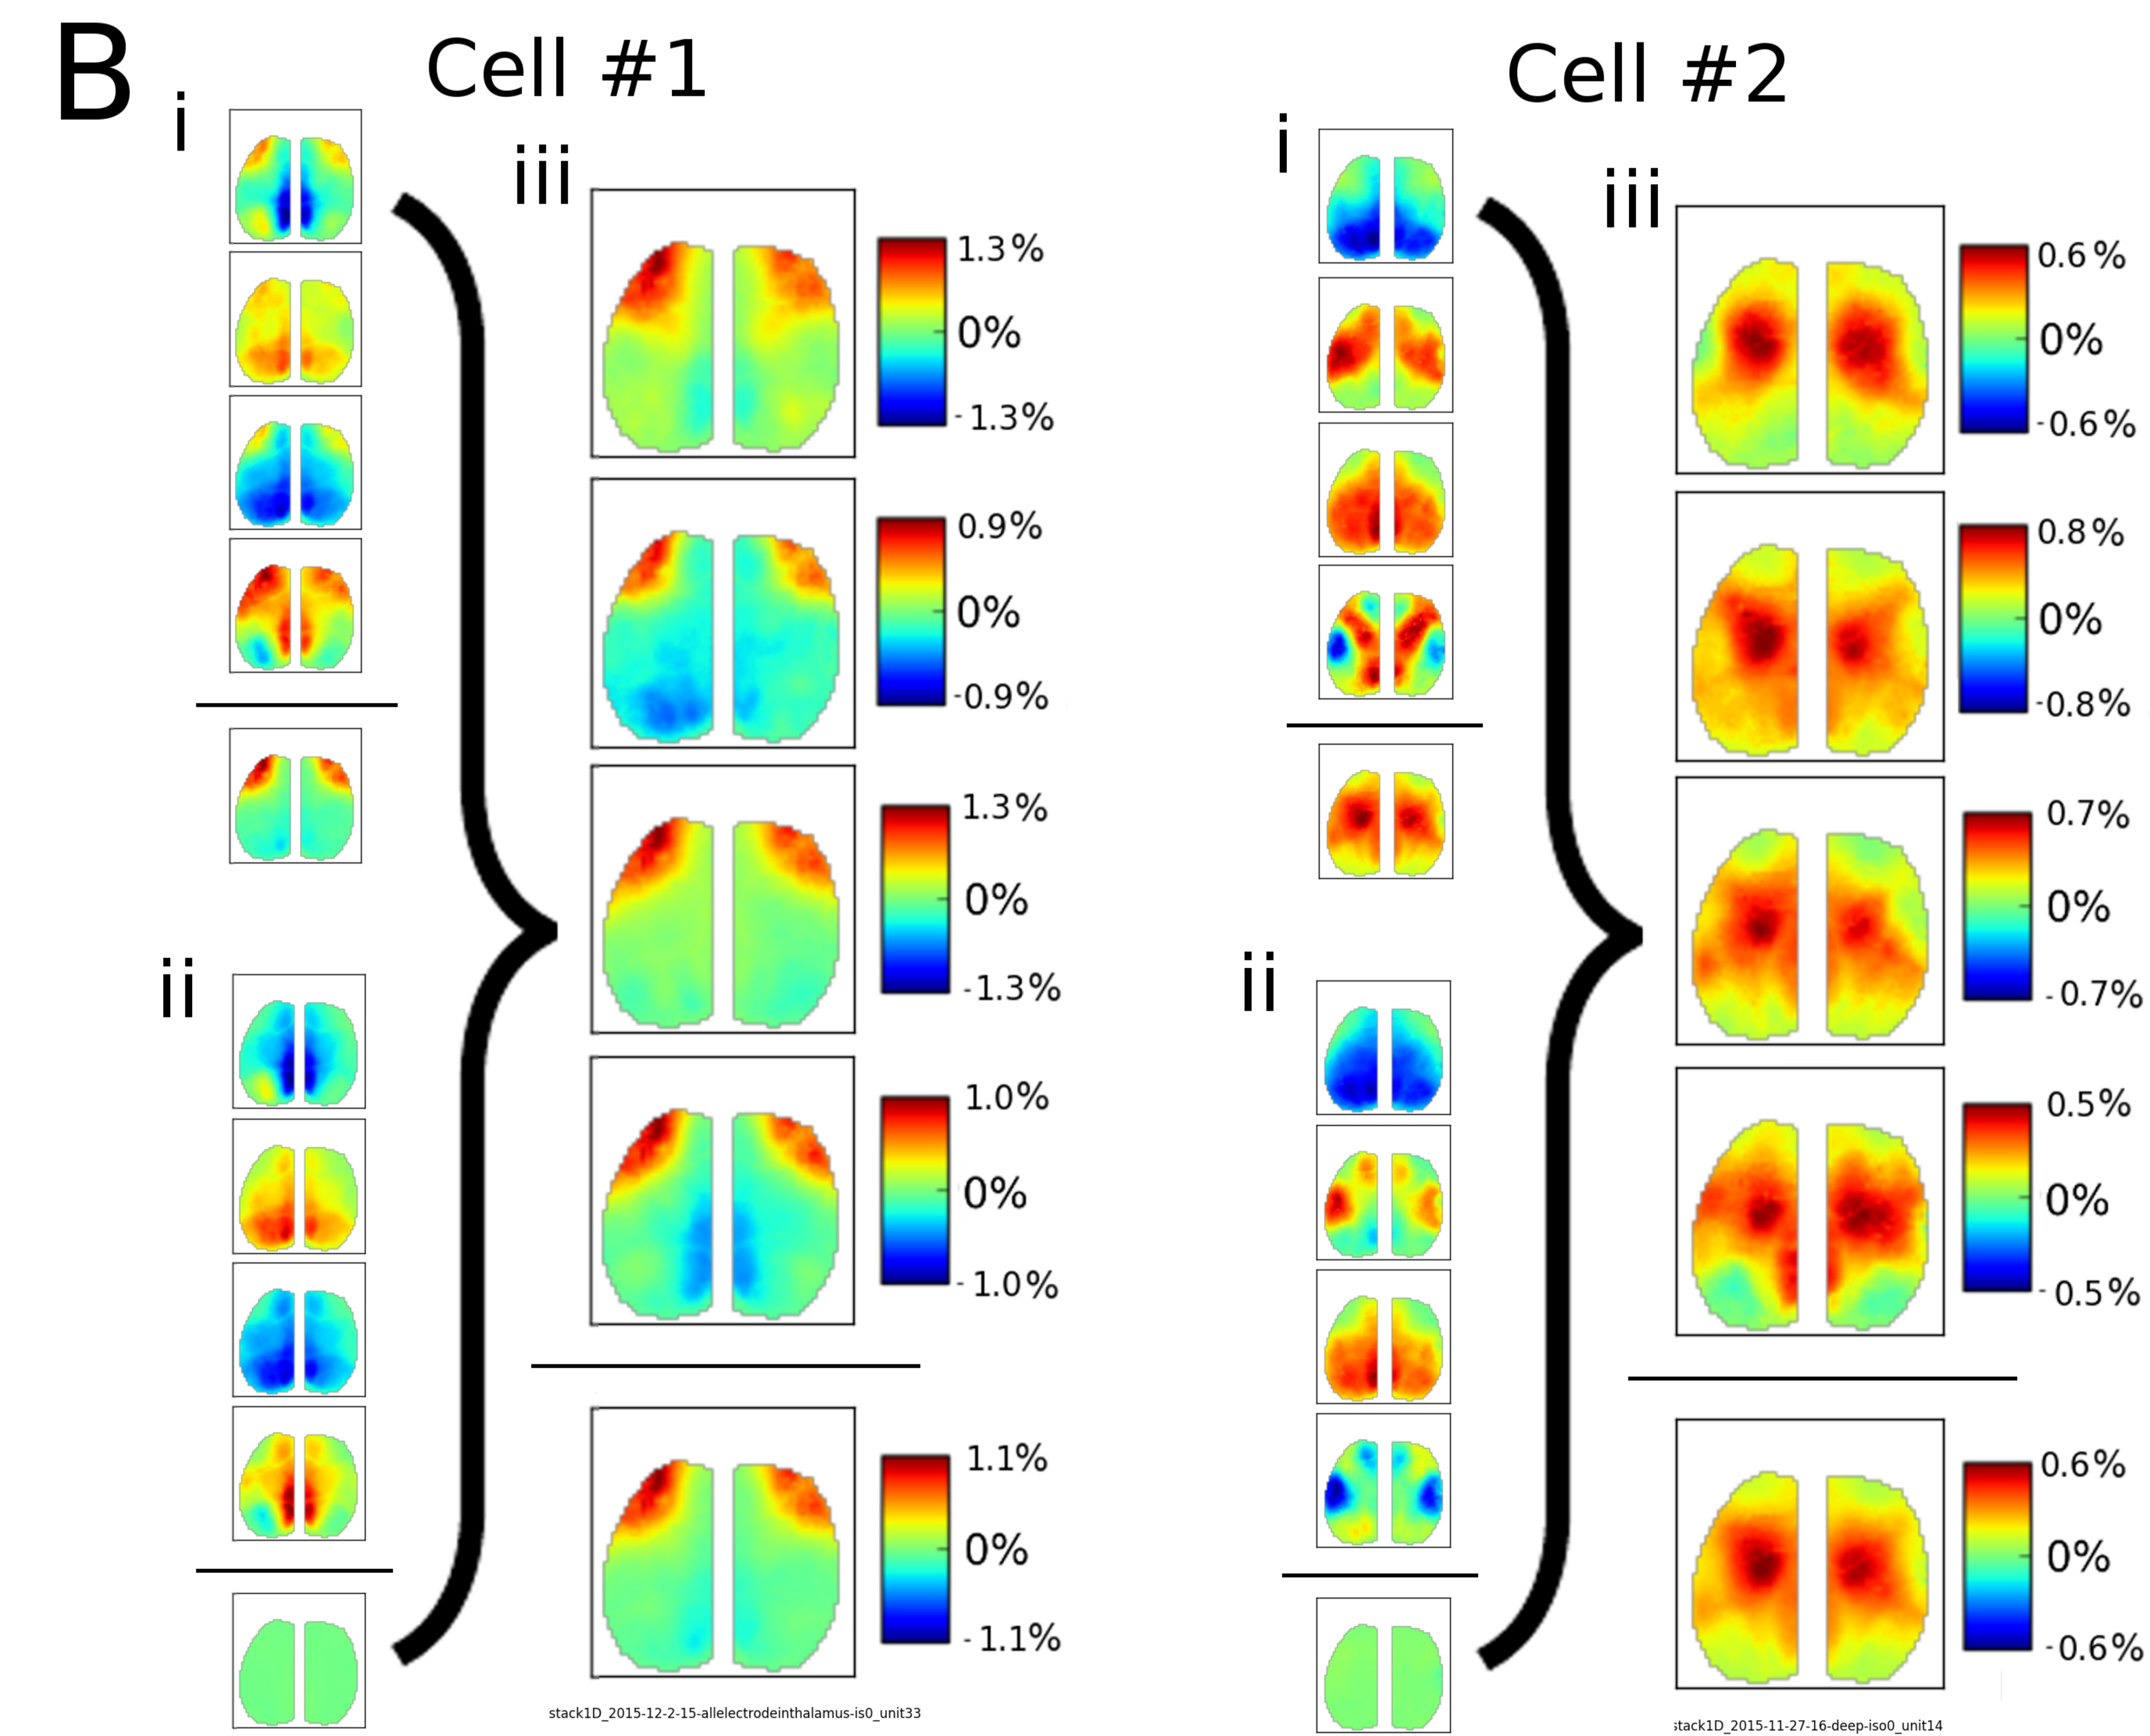

Supplement: supp [file elife_poa_e19976_Figure_6_figure_supplement_5.pdf › elife_poa_e19976_Figure_6_figure_supplement_5.pdf]
