# Supplementary figures and images for: Mapping cortical mesoscopic networks of single spiking cortical or sub-cortical neurons
Source: eLife journal article supplement (doi:10.7554/elife.19976), 2017-02-04

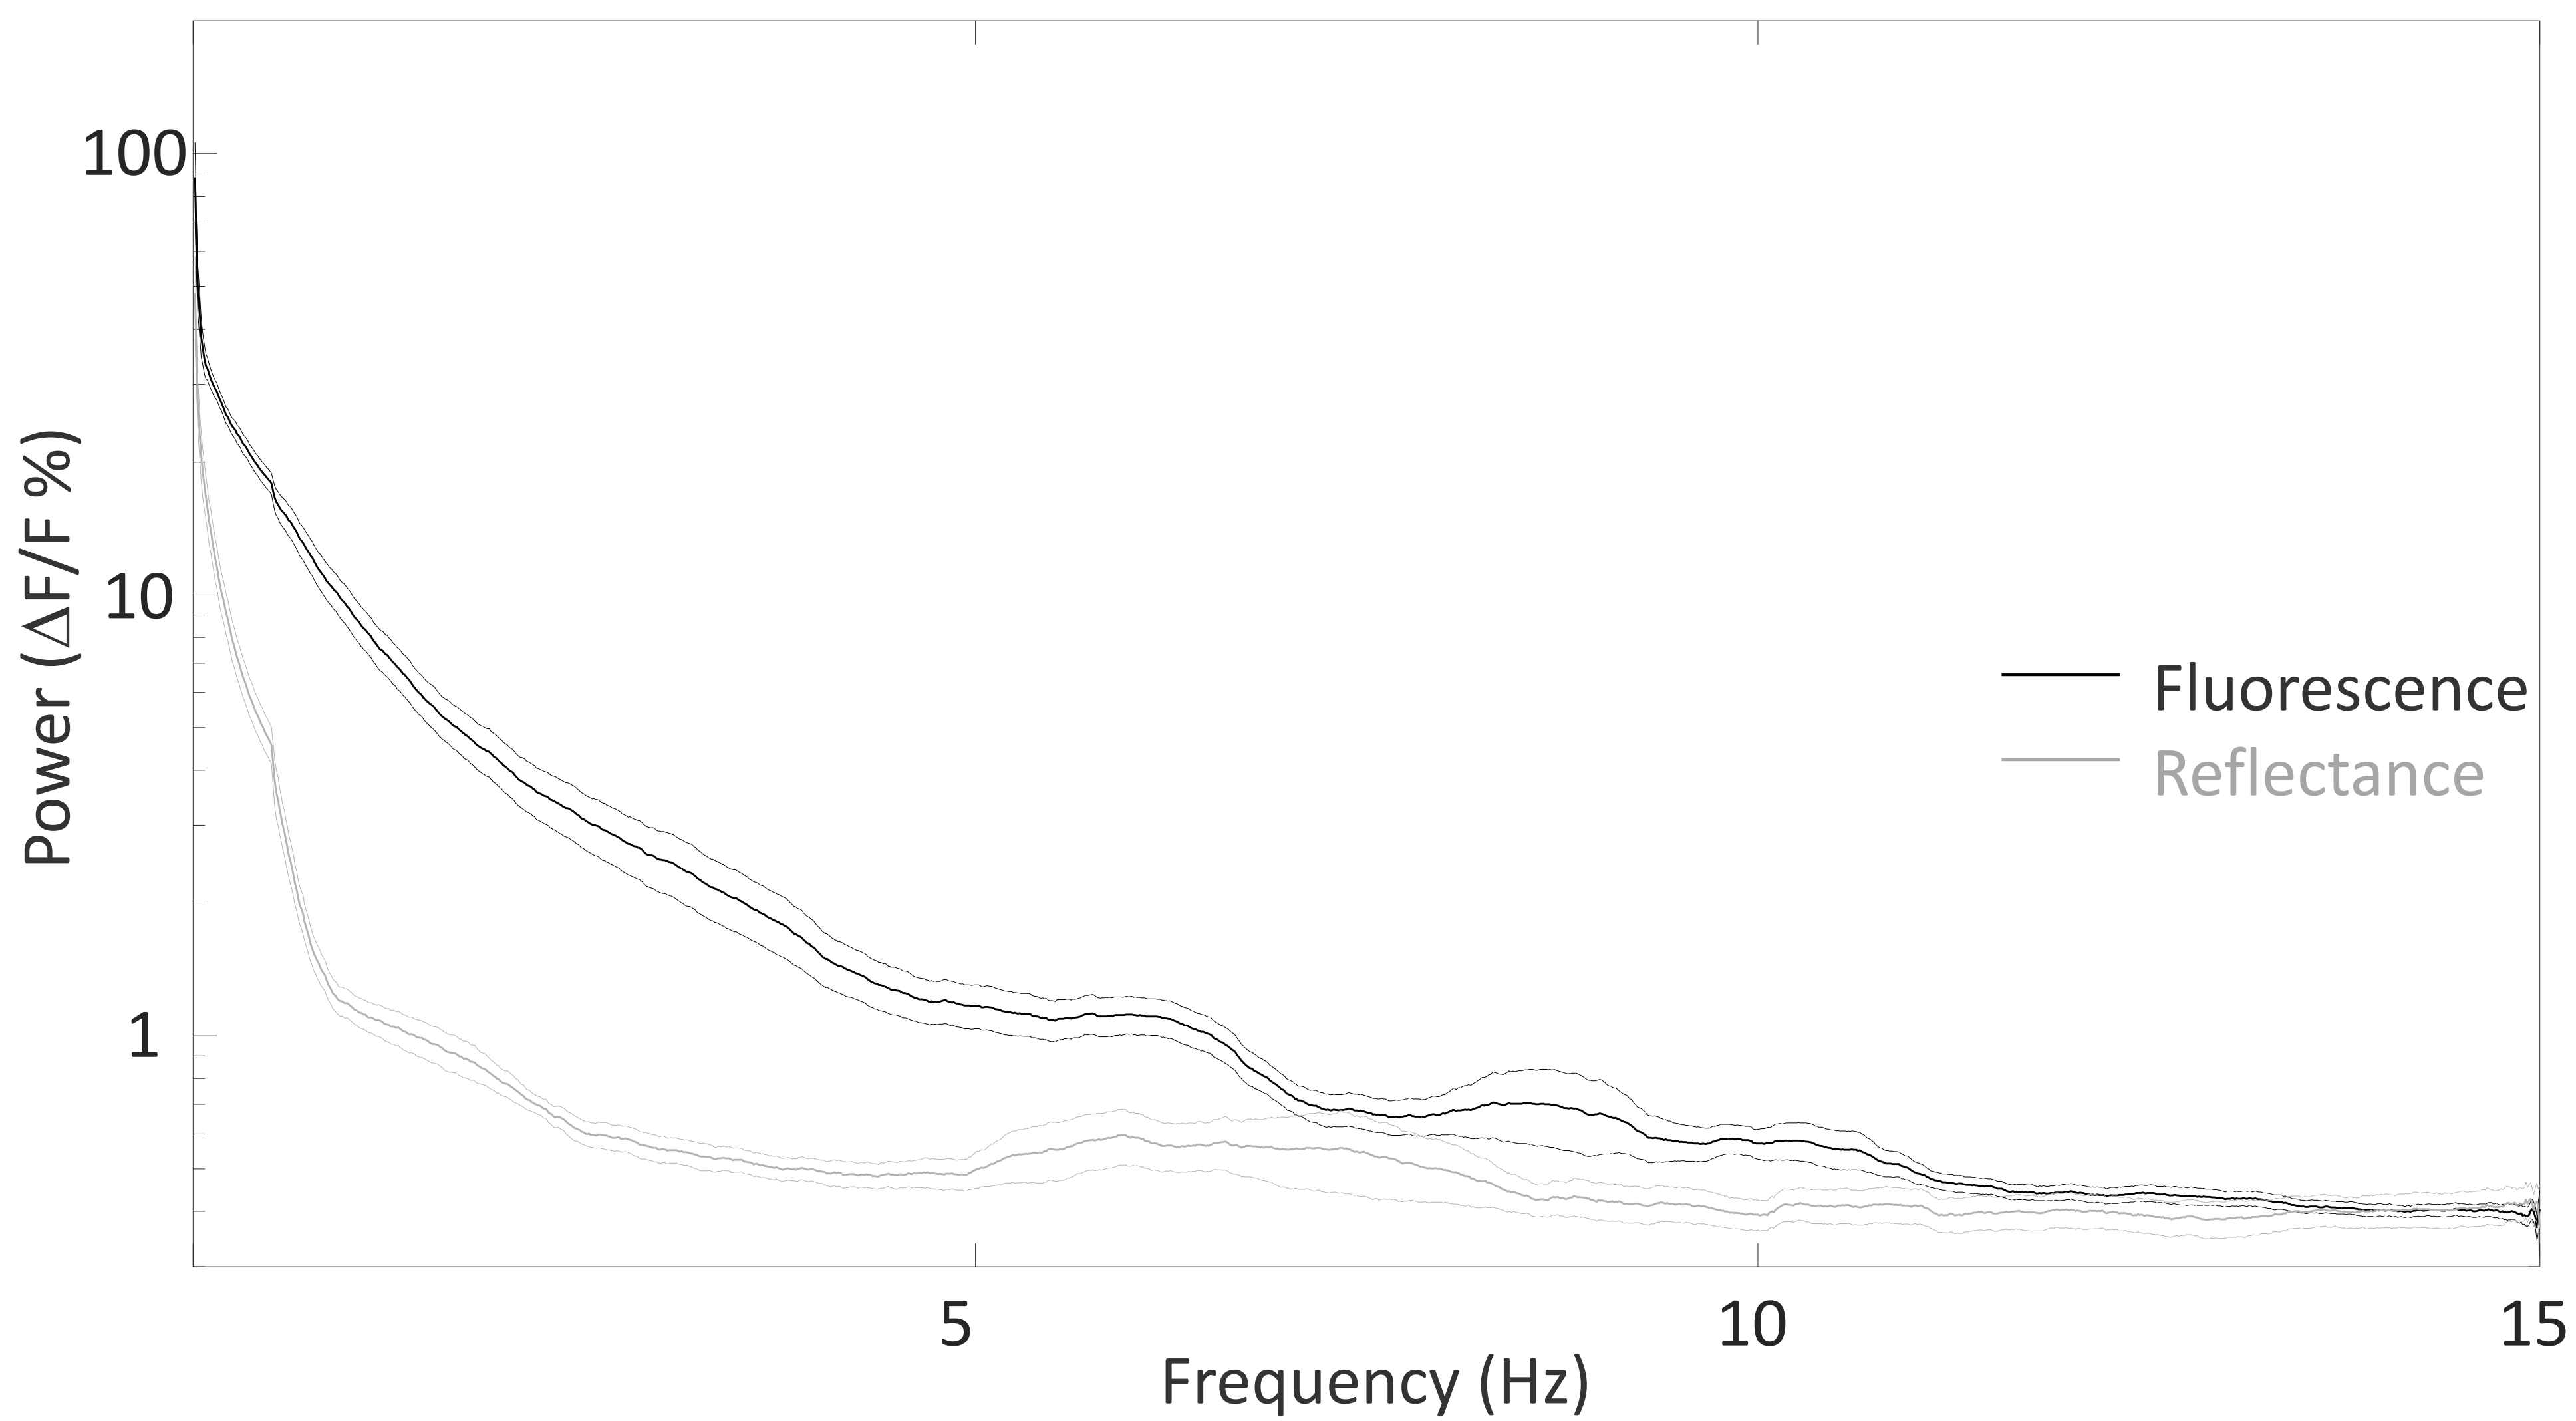

Figure 1-figure supplement 1

Supplement: supp [file elife_poa_e19976_Figure_1_figure_supplement_1.pdf › elife_poa_e19976_Figure_1_figure_supplement_1.pdf]

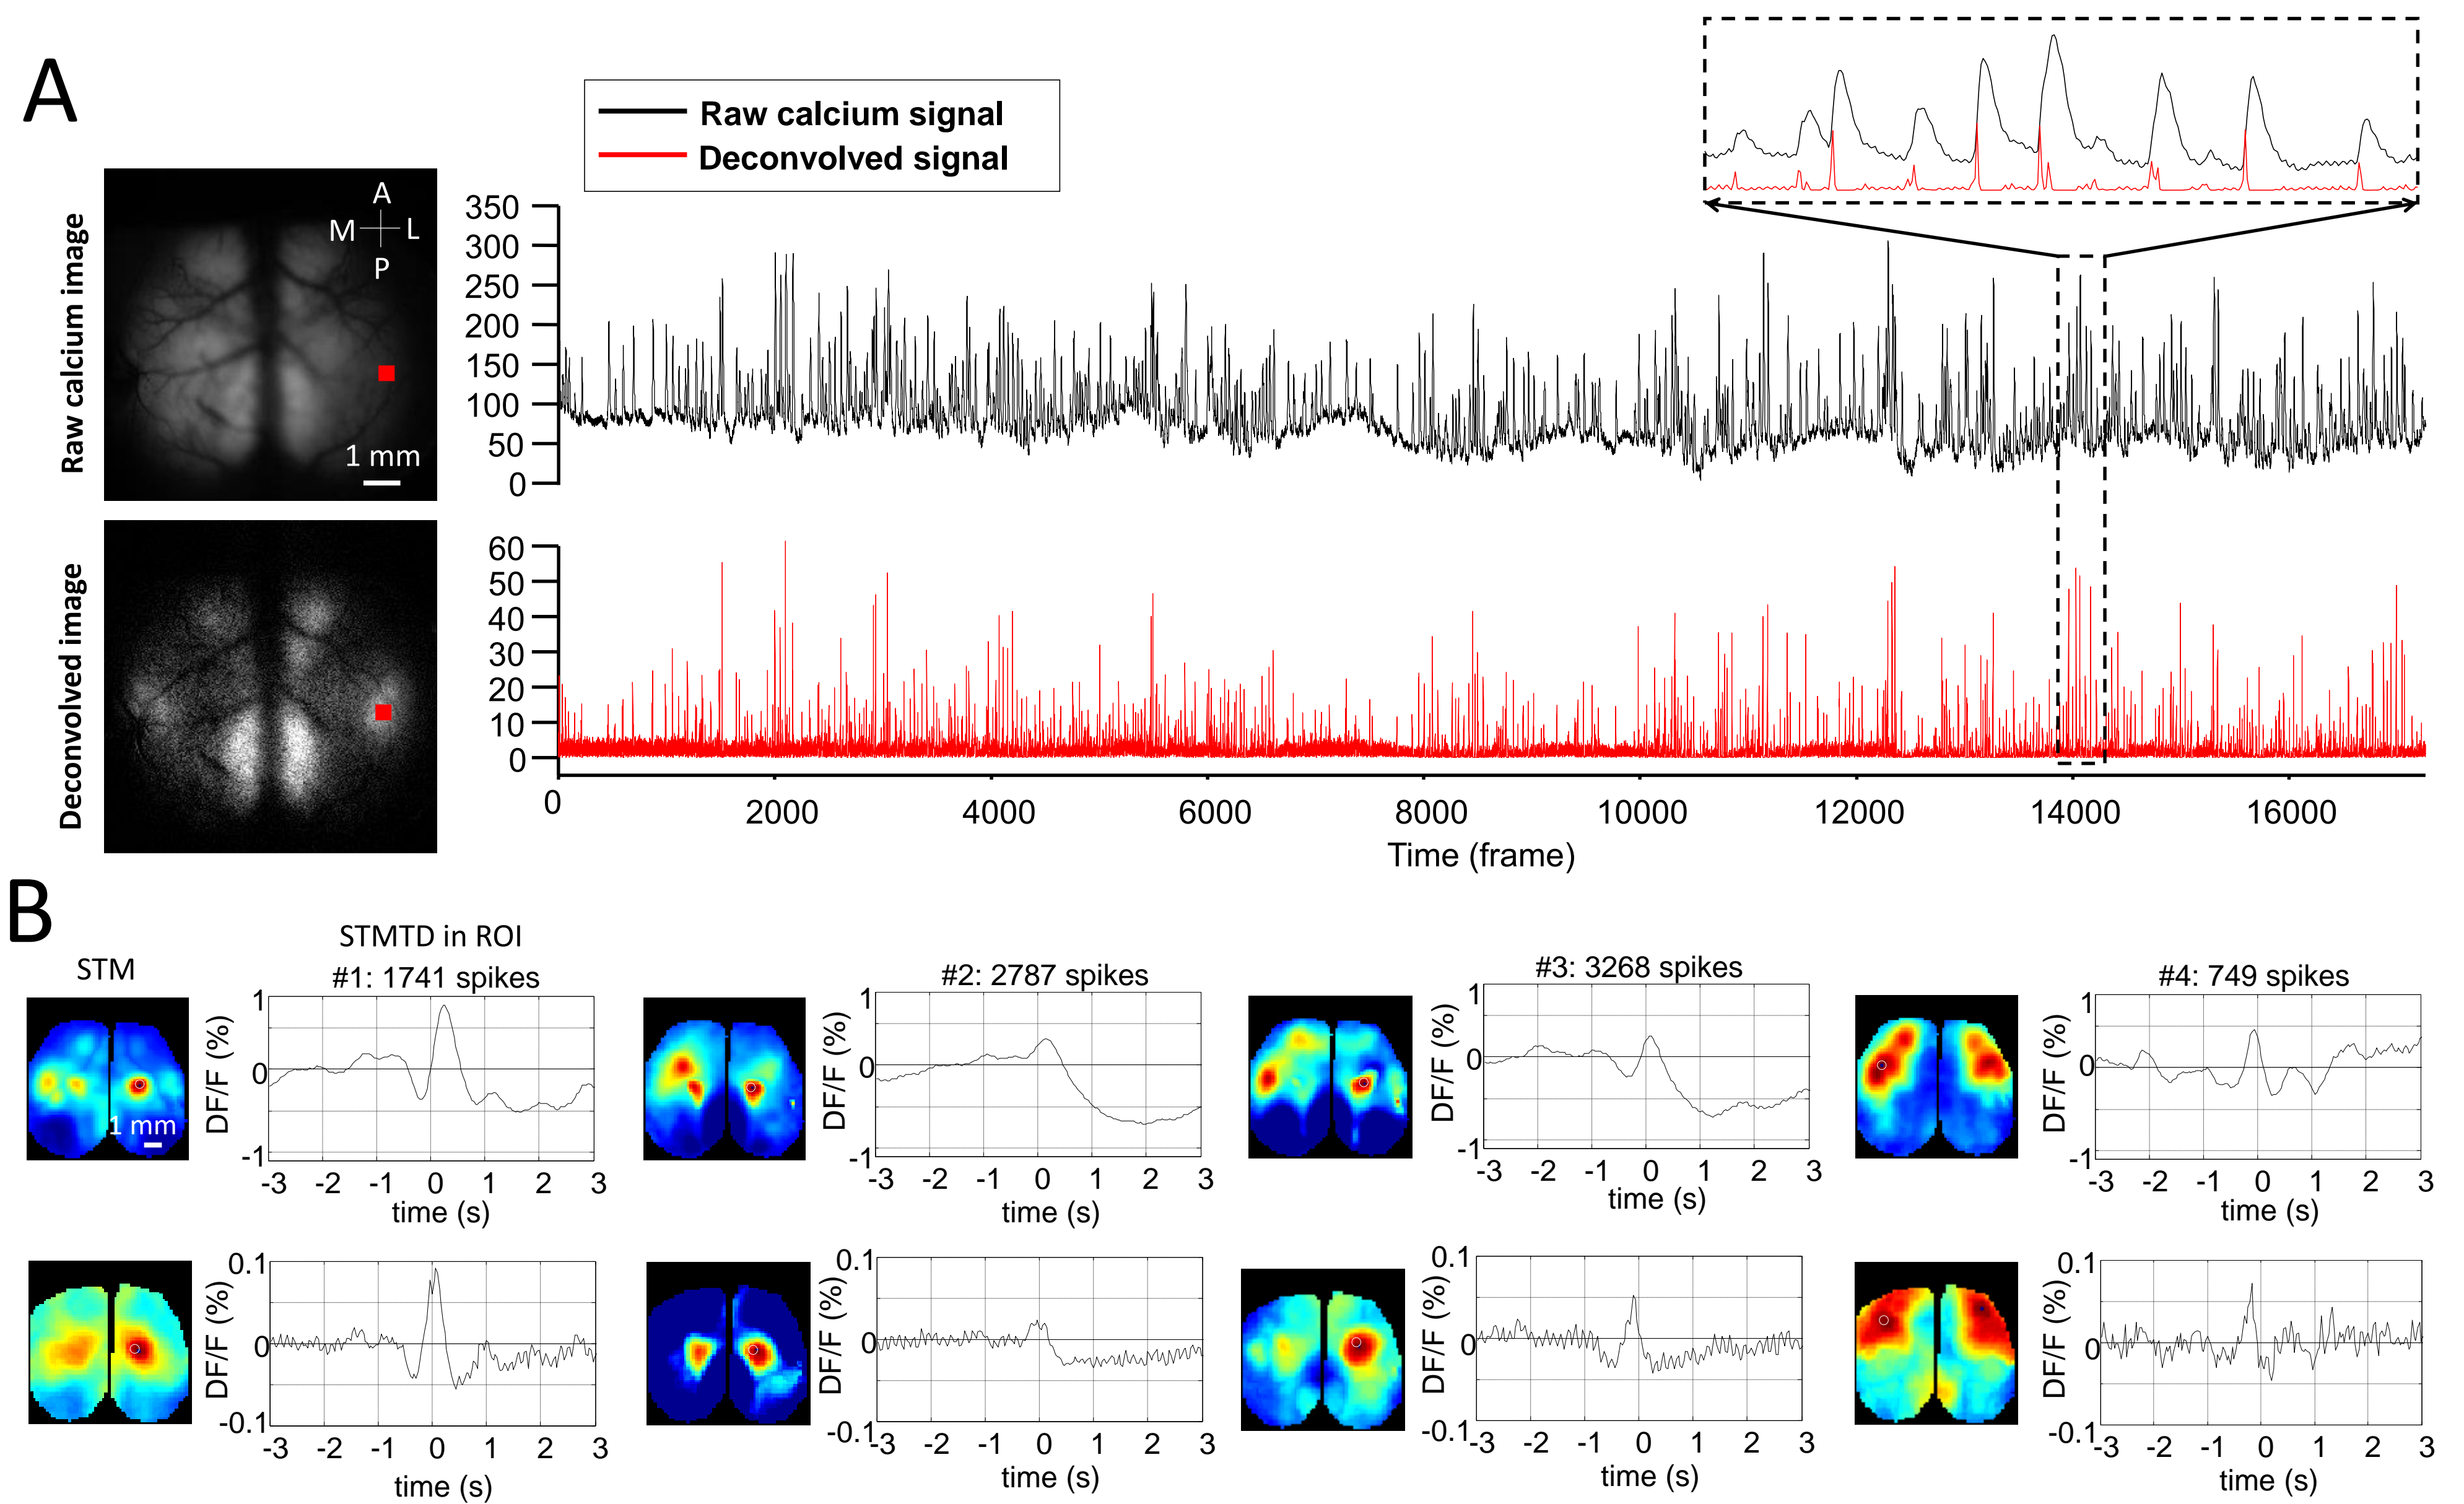

Figure 1-figure supplement 2

Supplement: supp [file elife_poa_e19976_Figure_1_figure_supplement_2.pdf › elife_poa_e19976_Figure_1_figure_supplement_2.pdf]

# Cortical STMs: Single Cell vs. MUA vs. LFP

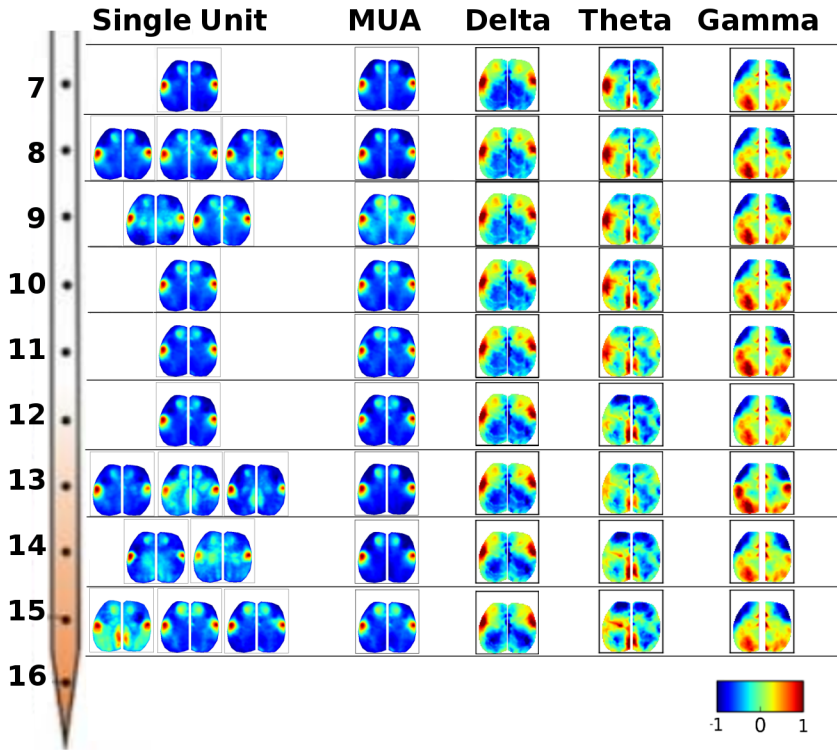

Supplement: supp [file elife_poa_e19976_Figure_3_figure_supplement_1.pdf › elife_poa_e19976_Figure_3_figure_supplement_1.pdf]

Thalamic STMs: Single Cell vs. MUA vs. LFP

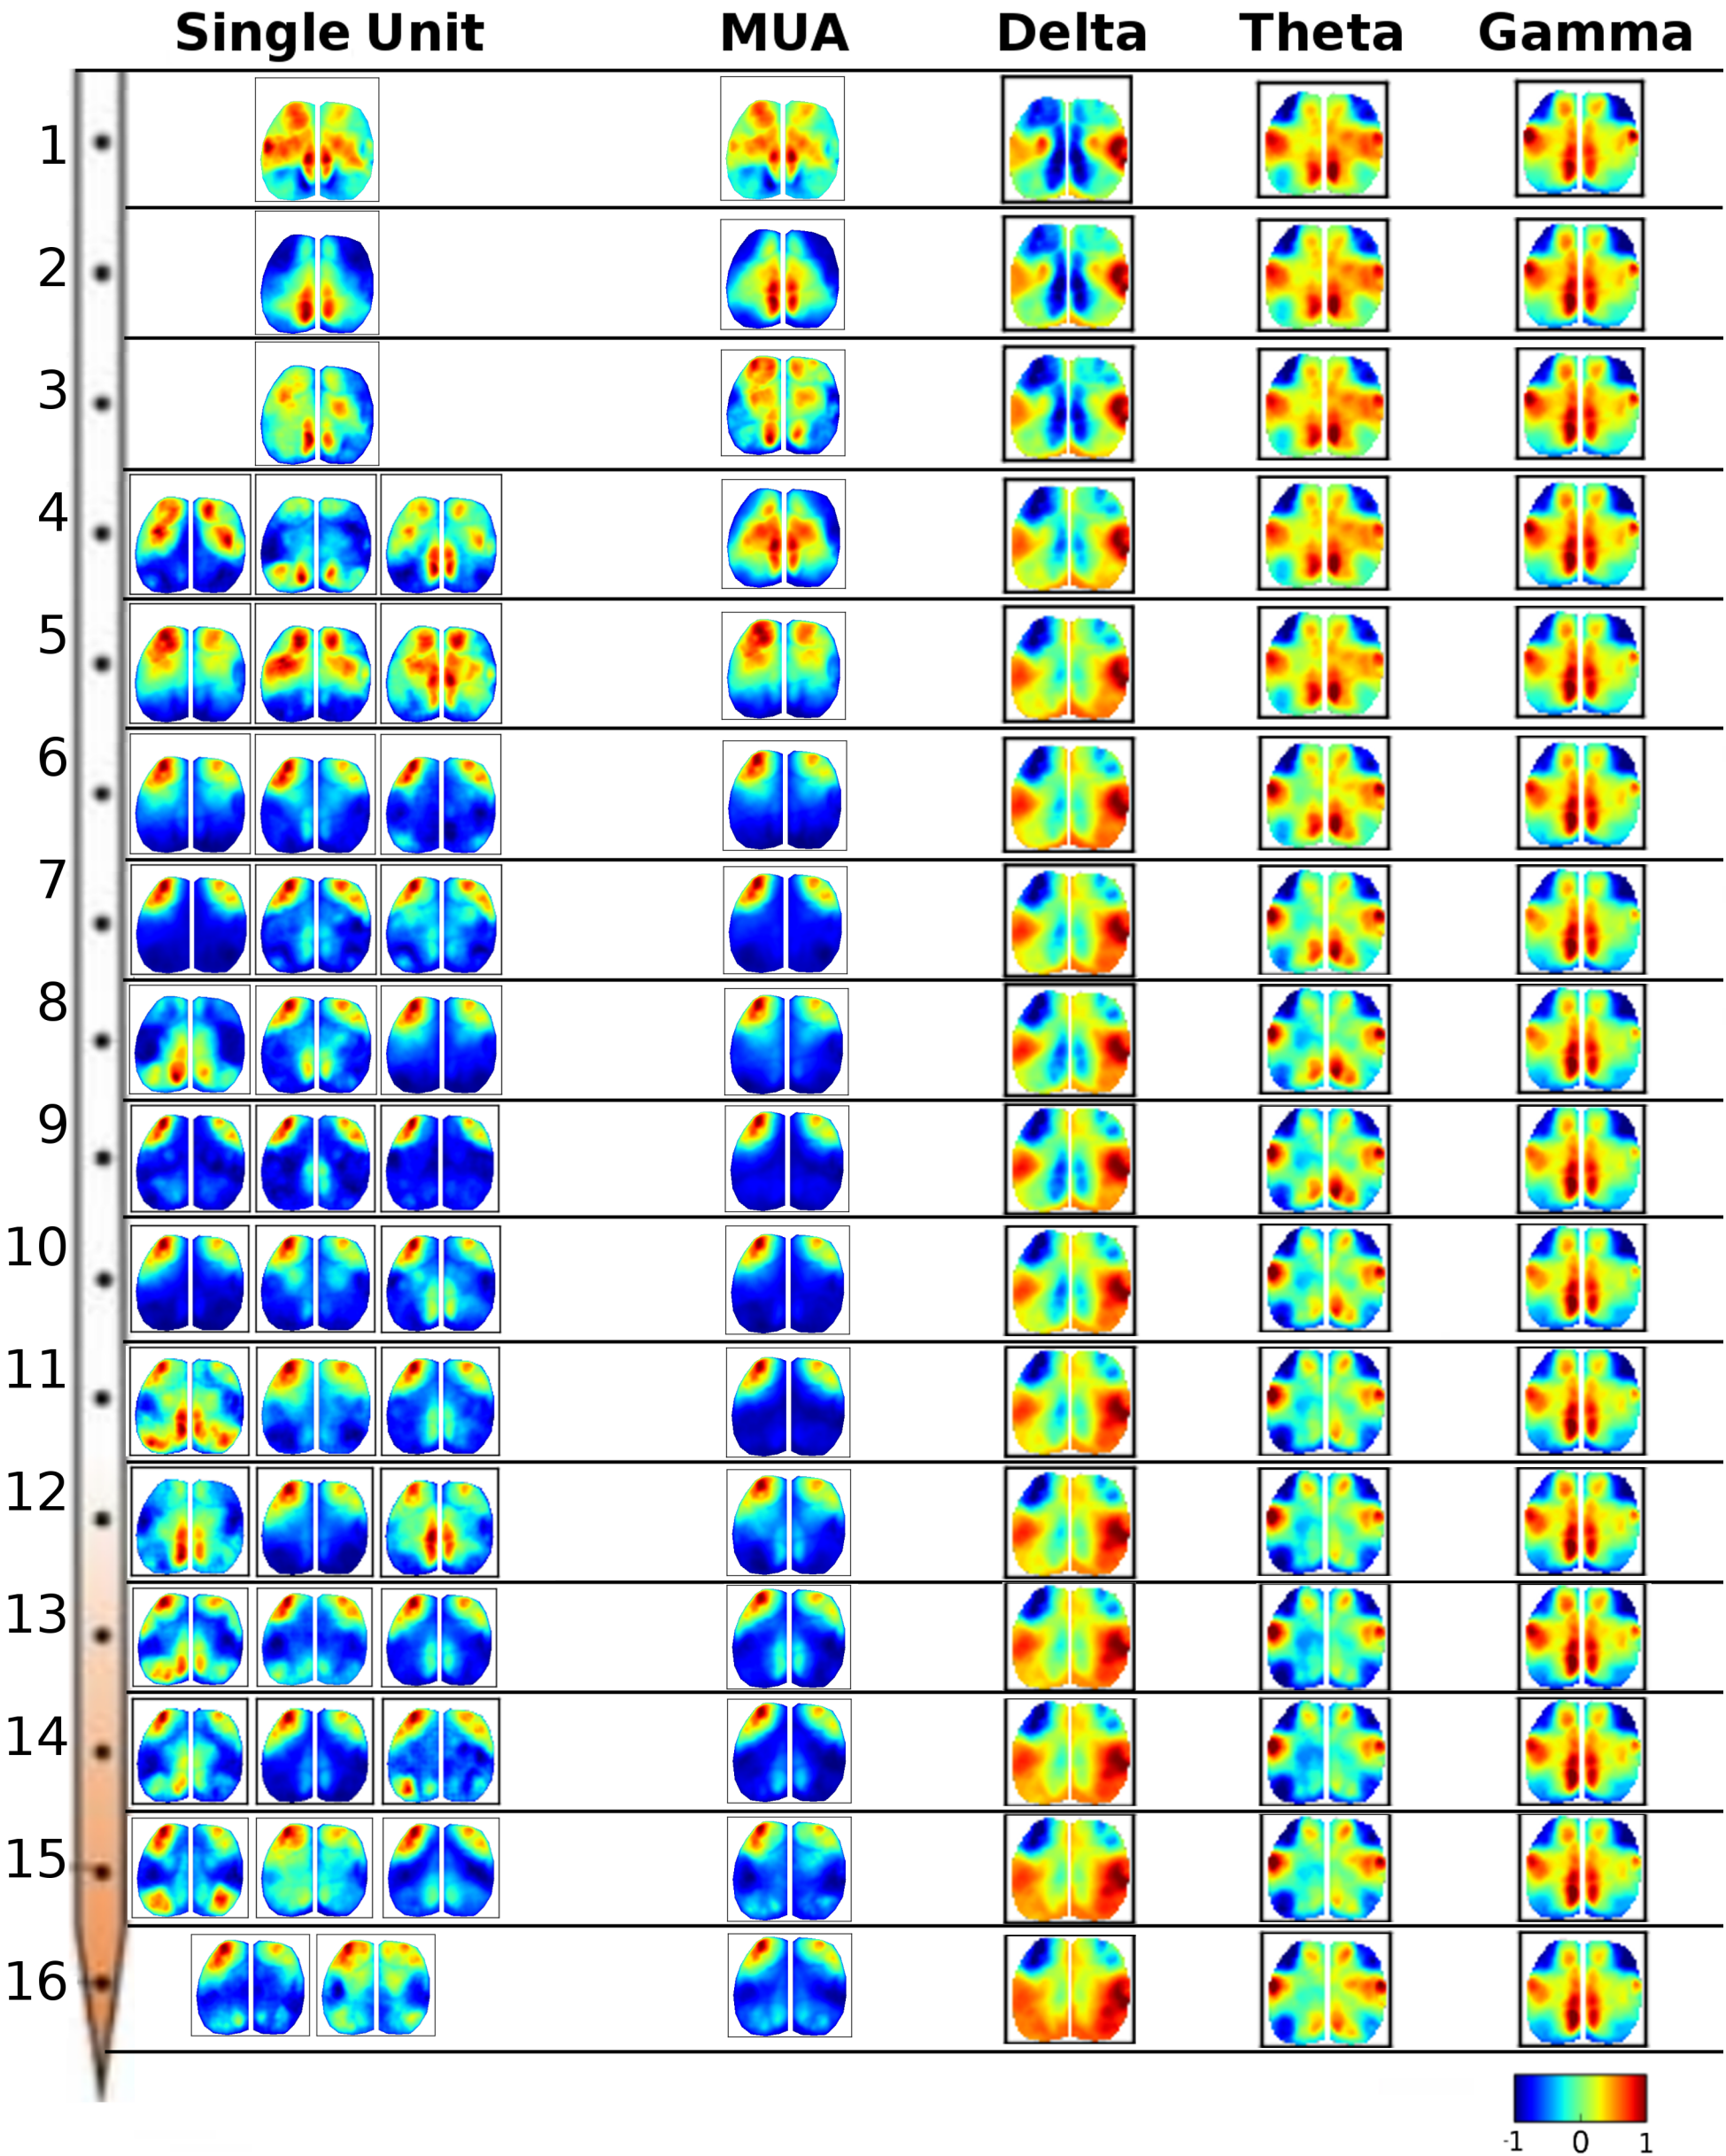

Supplement: supp [file elife_poa_e19976_Figure_3_figure_supplement_2.pdf › elife_poa_e19976_Figure_3_figure_supplement_2.pdf]

# Cortical Cell Spiking Modes

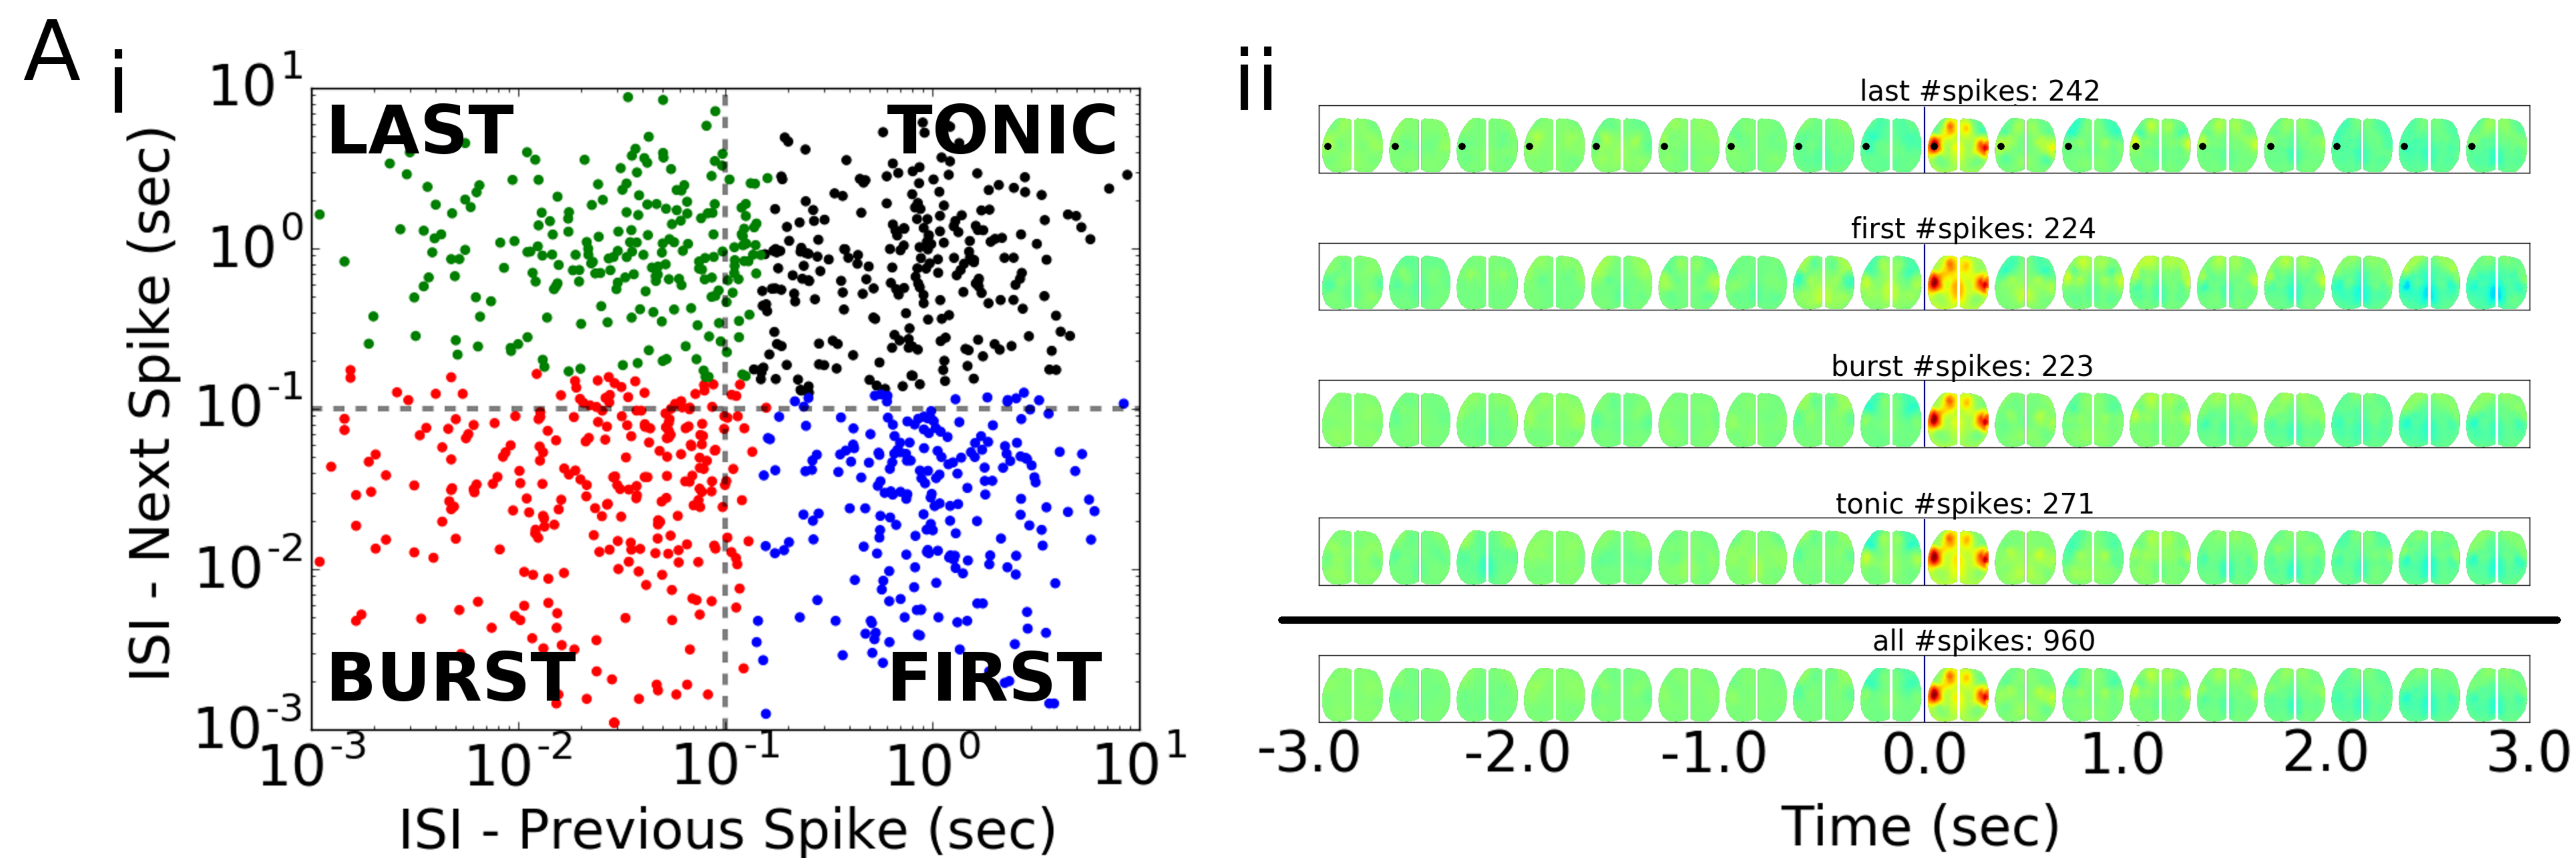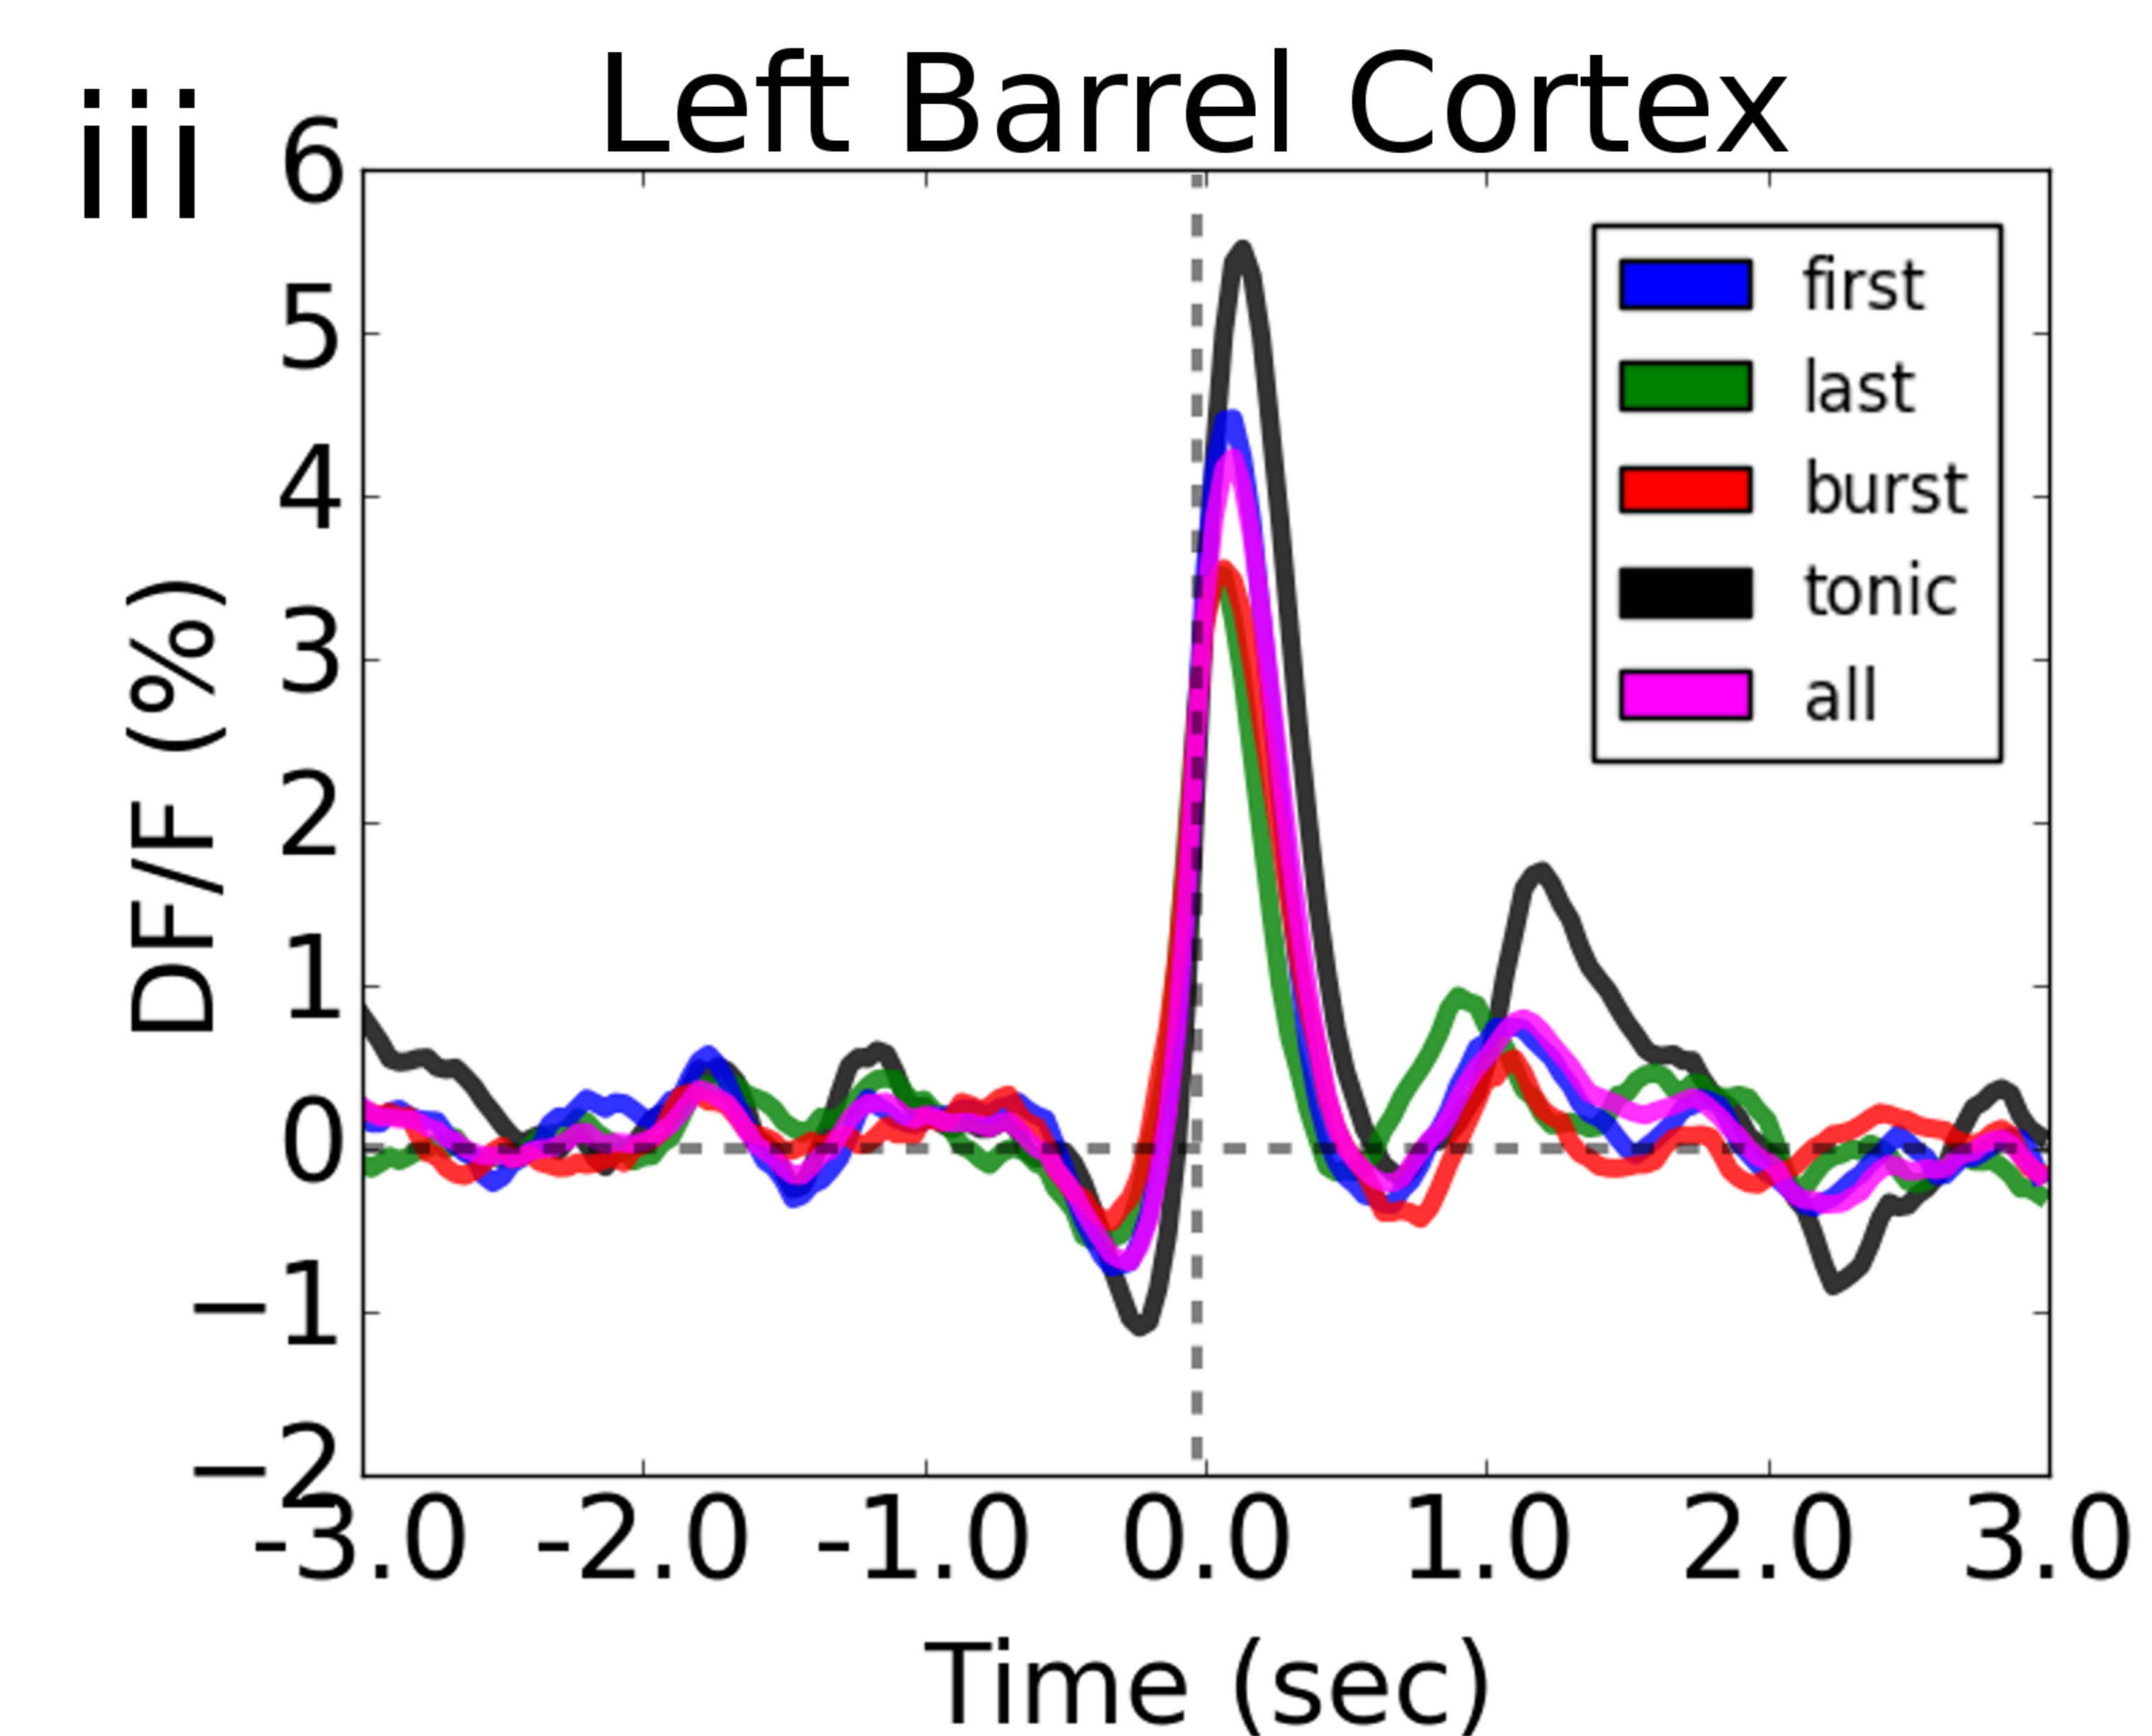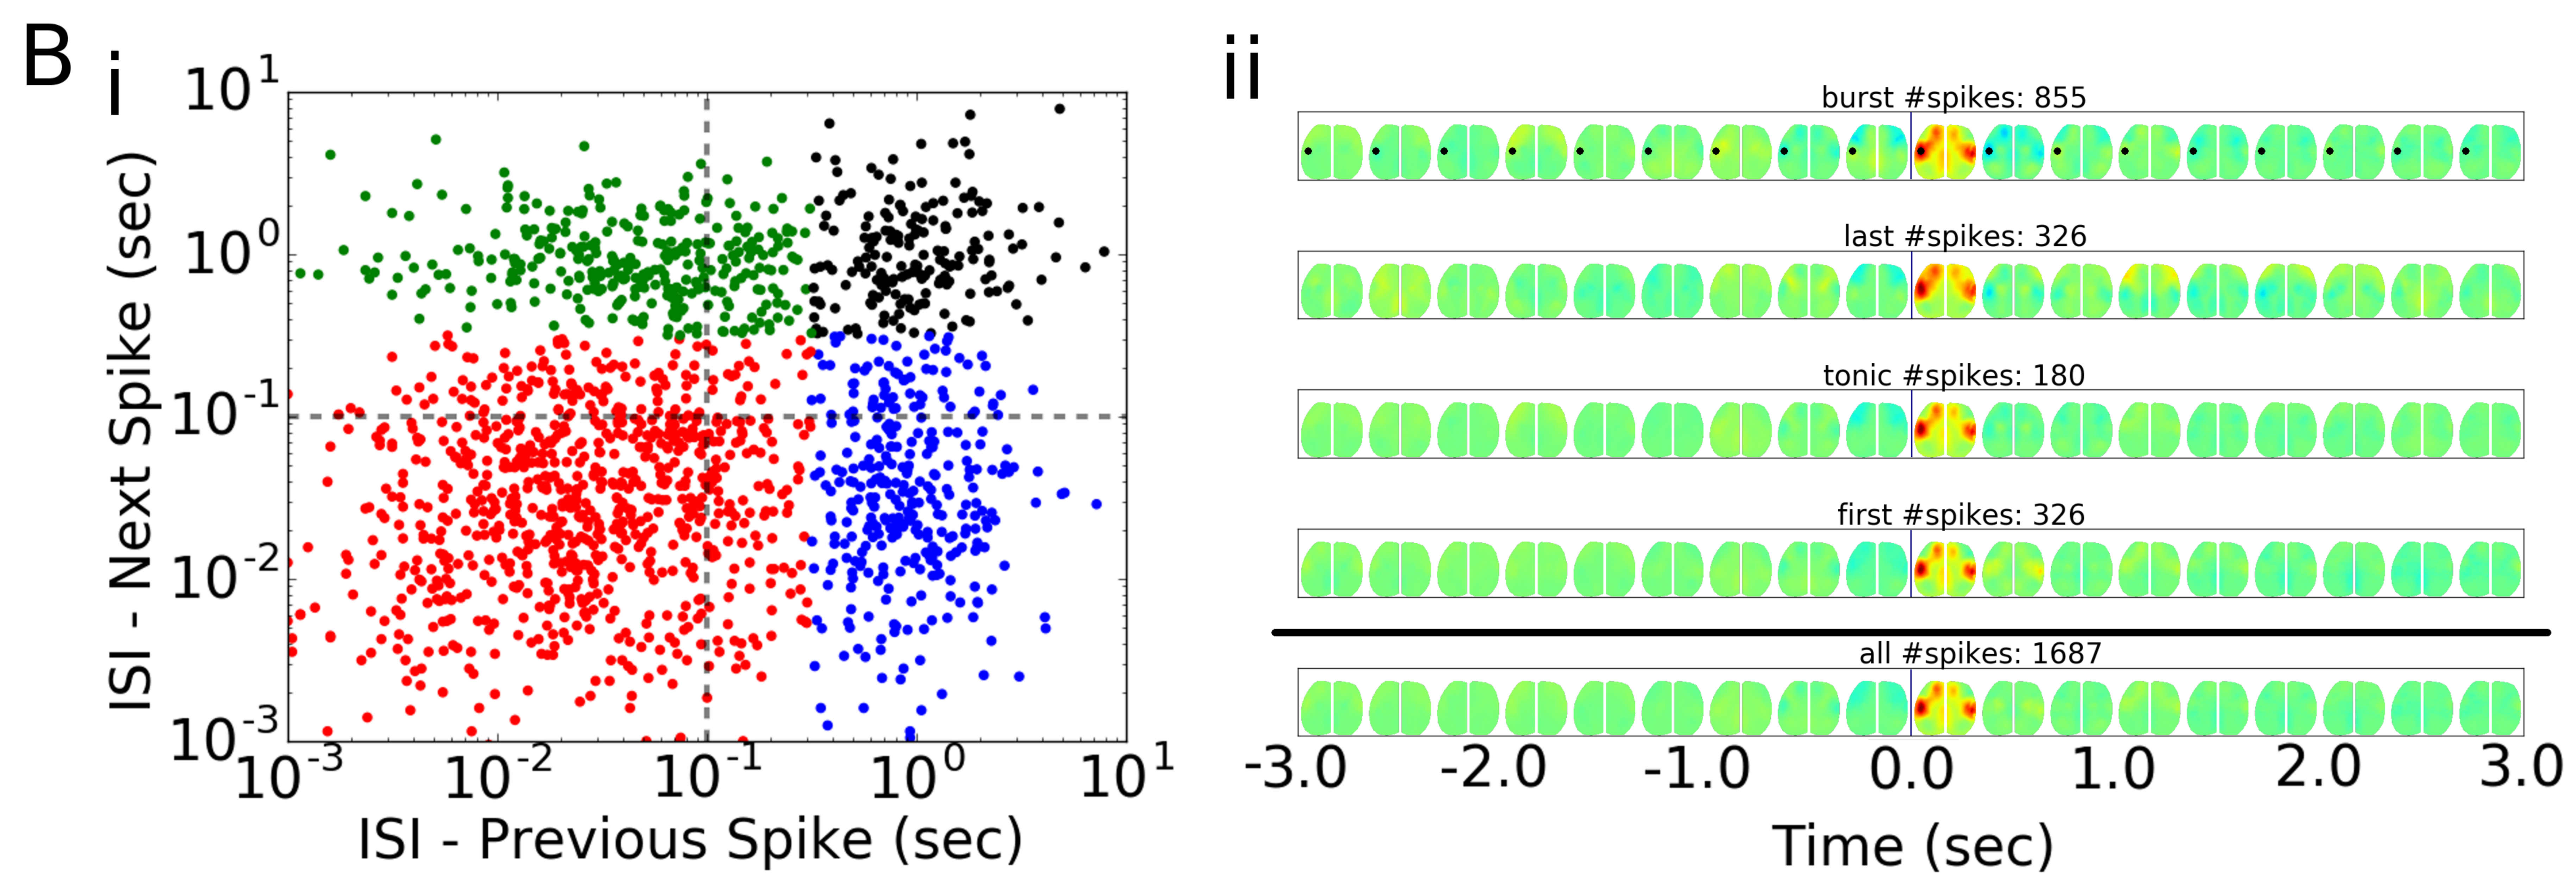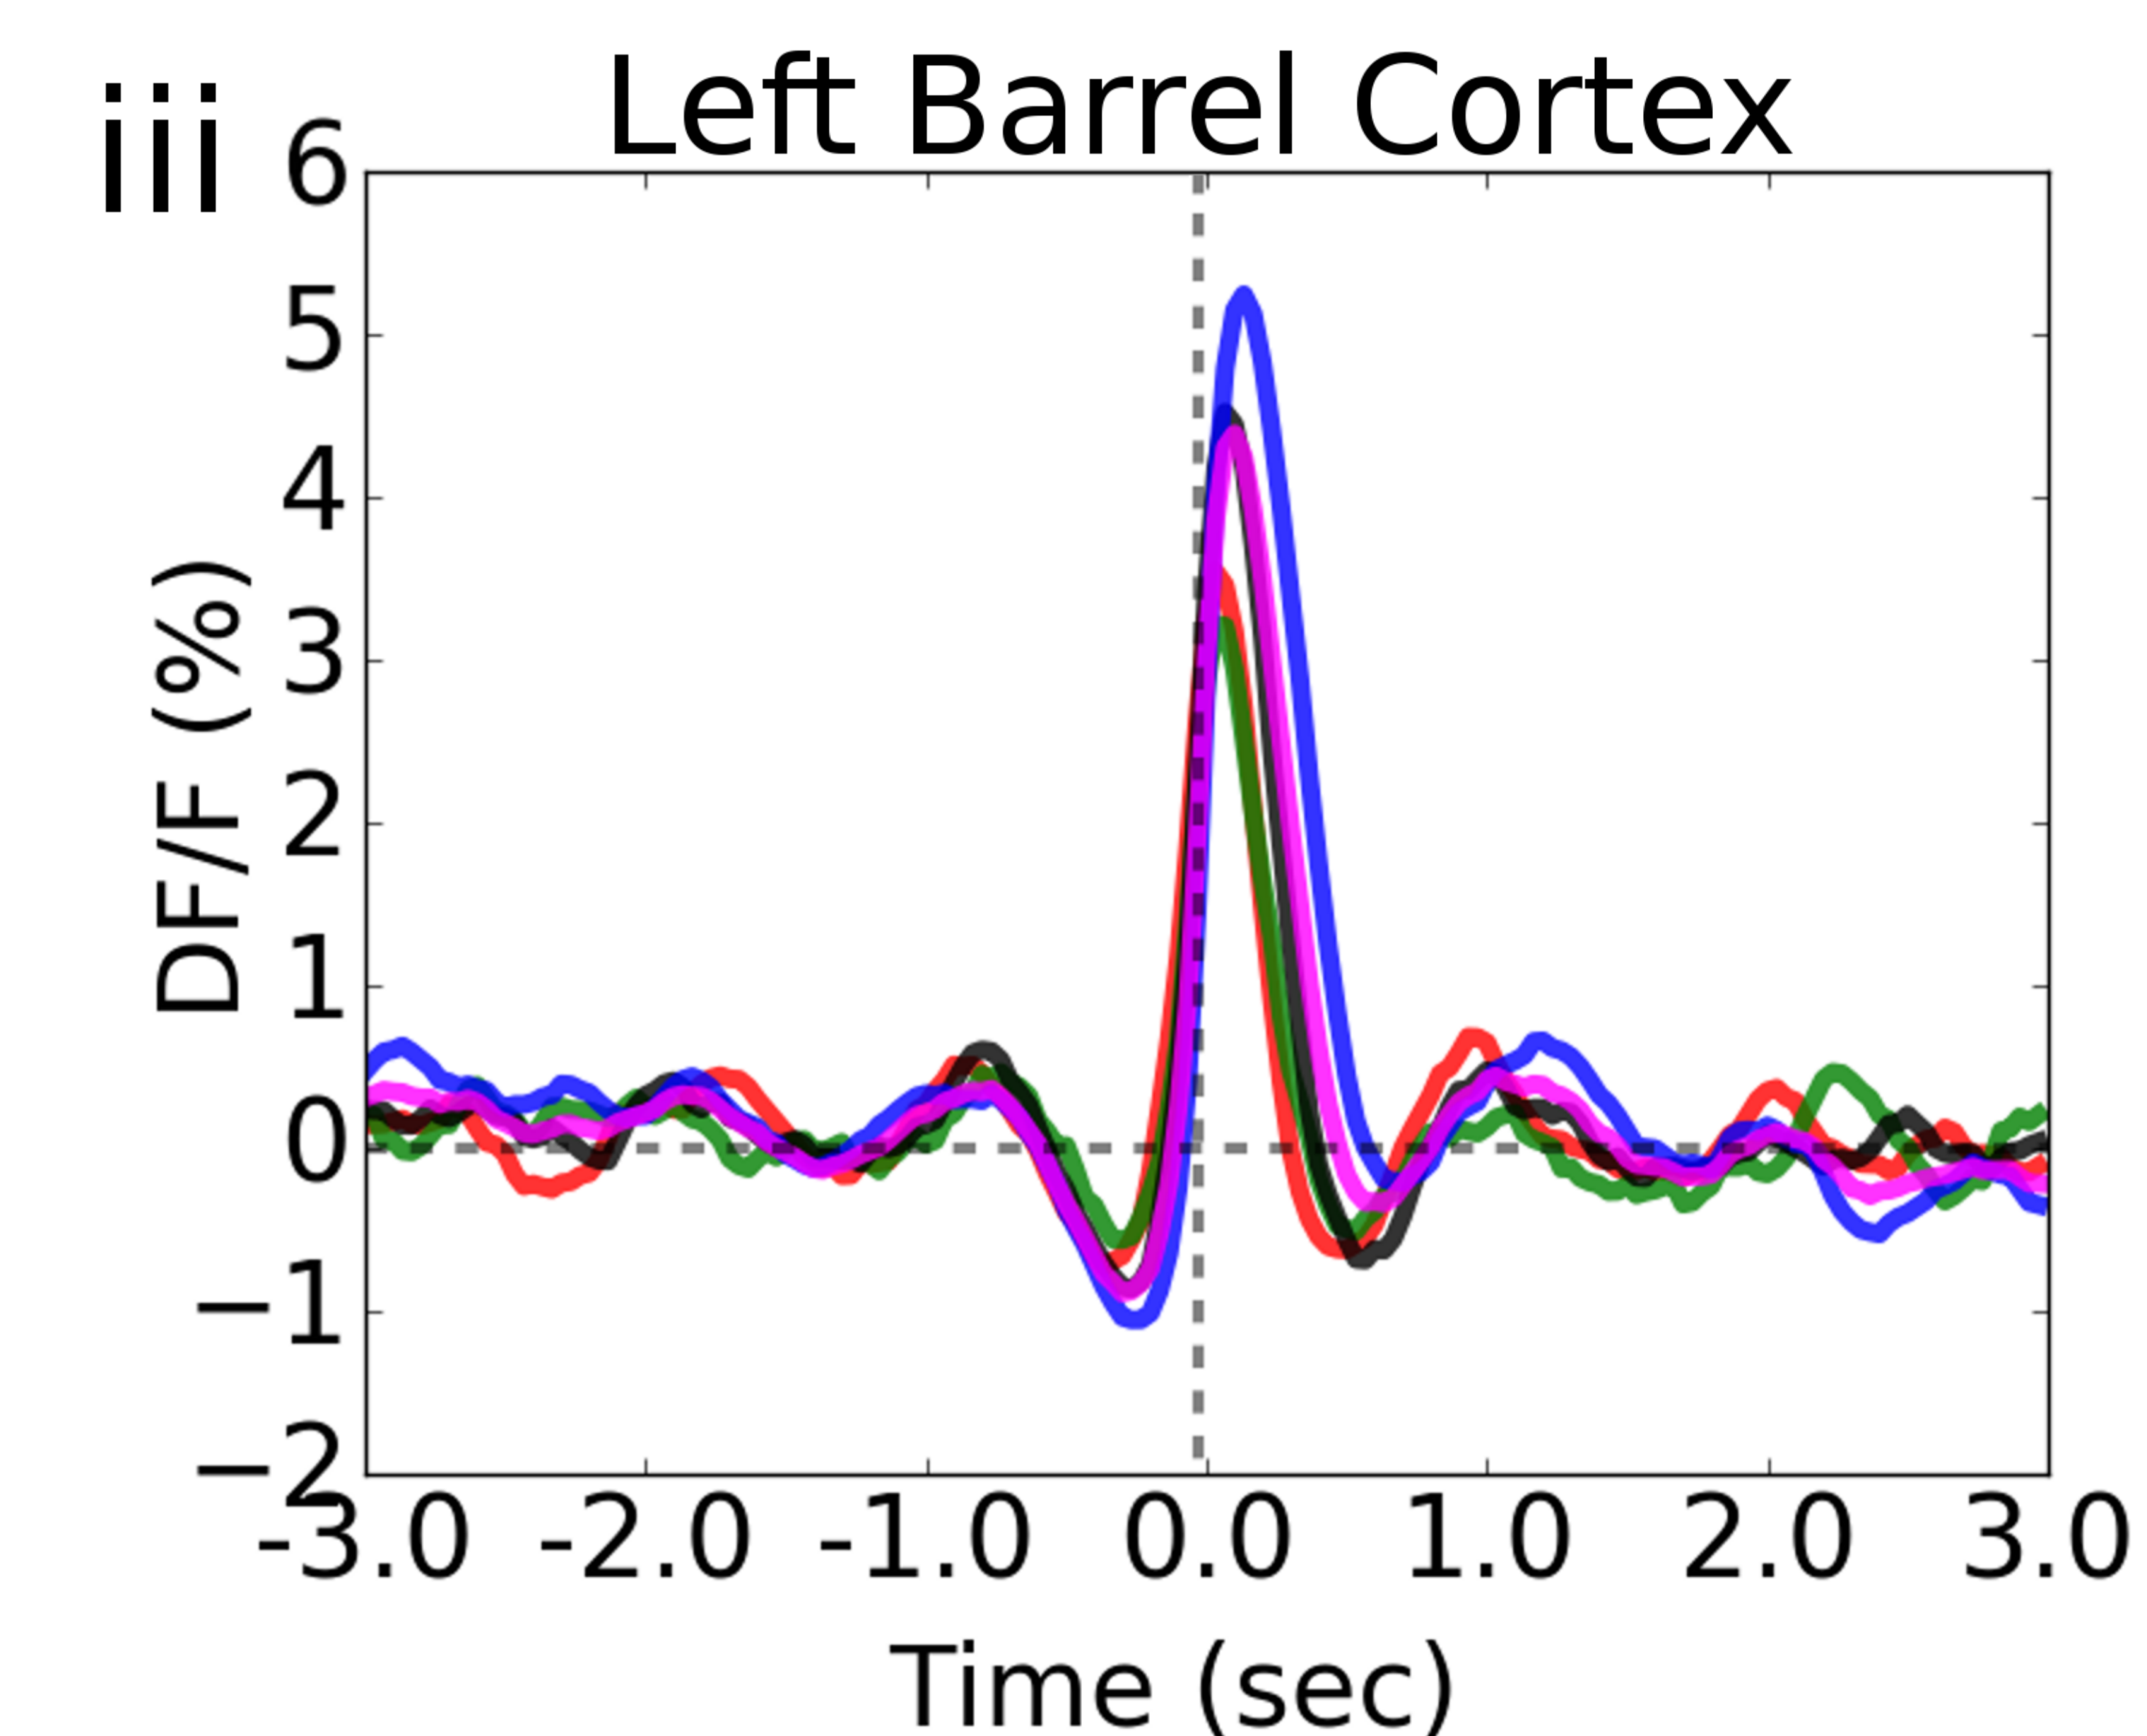

# Thalamic Cells Spiking Modes

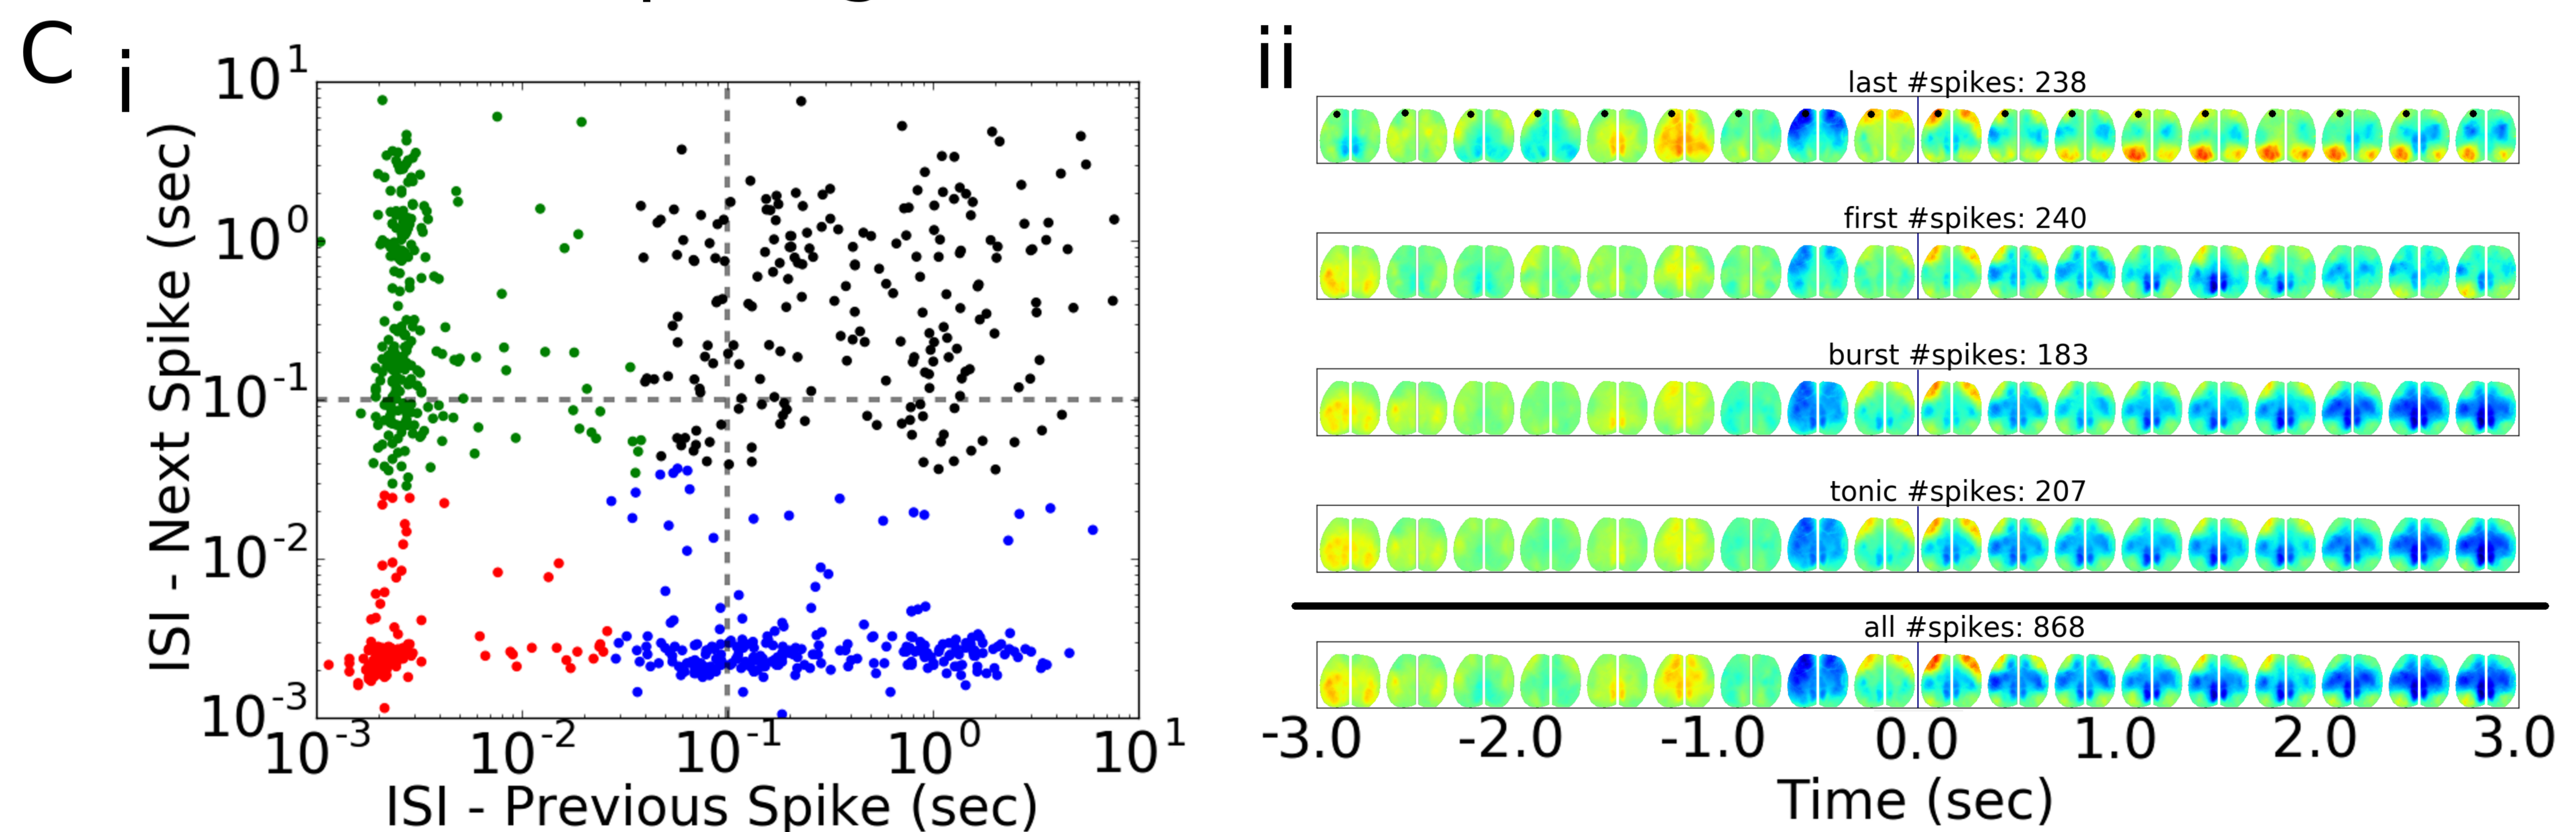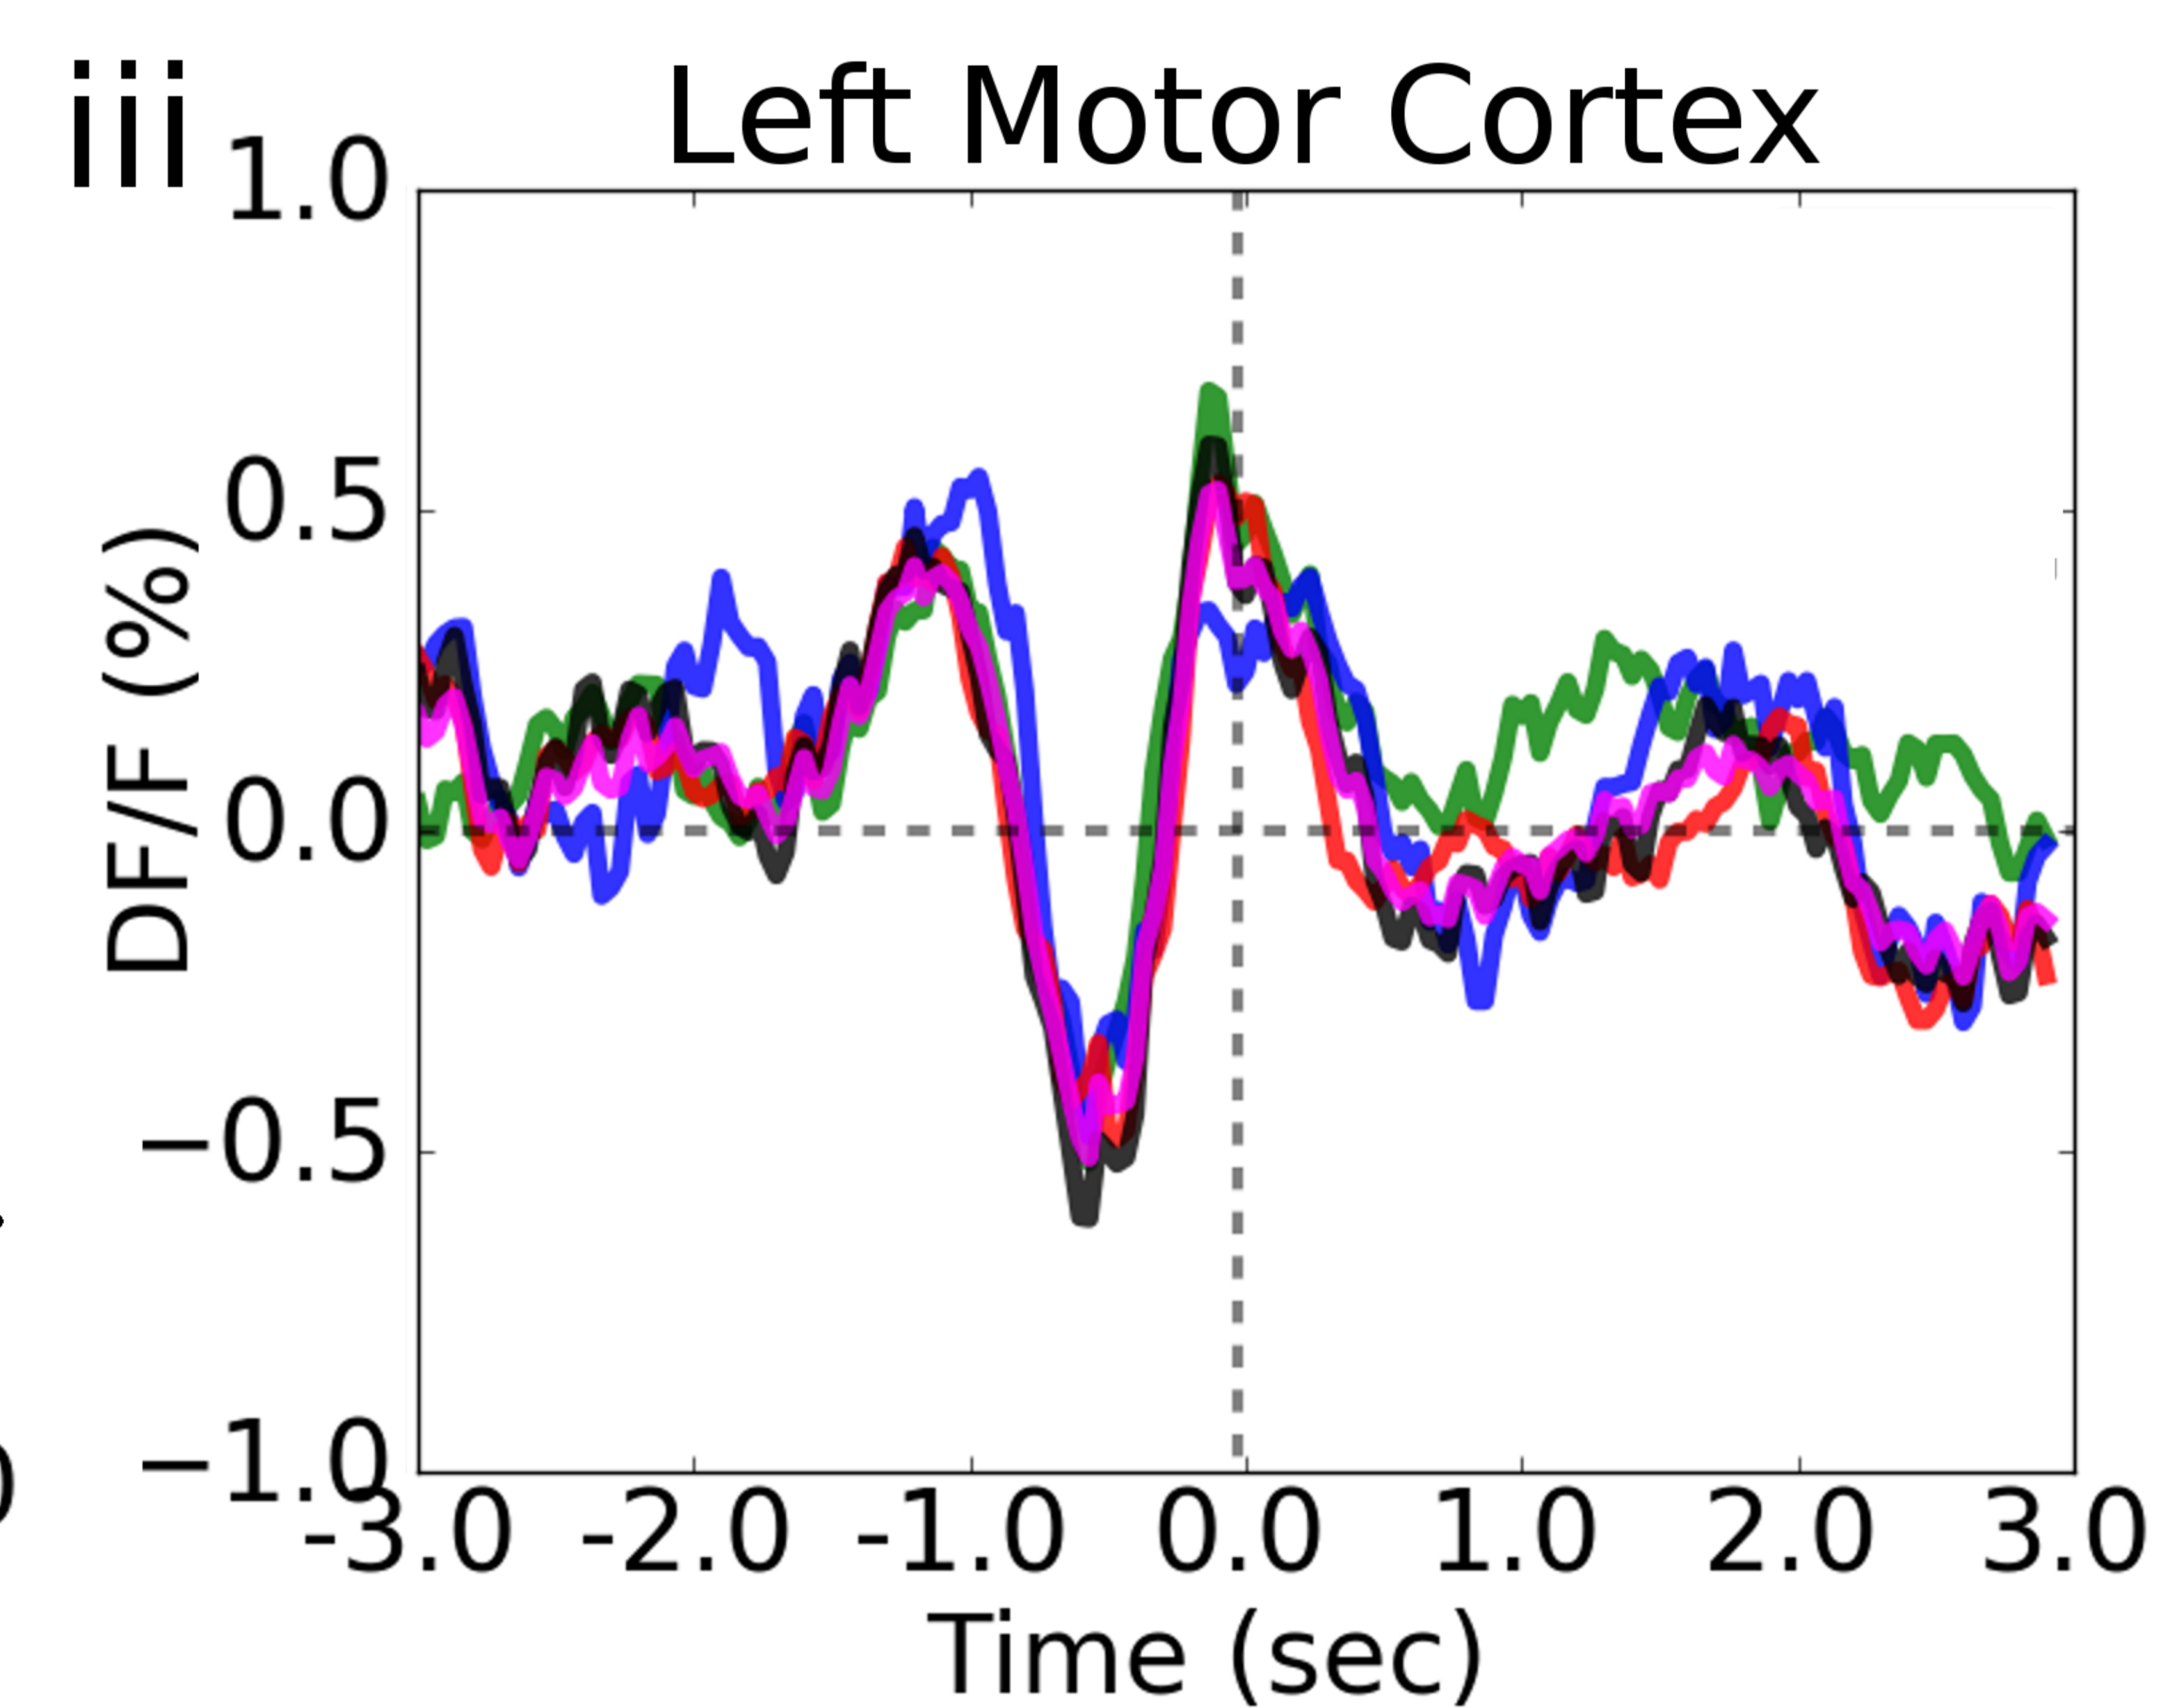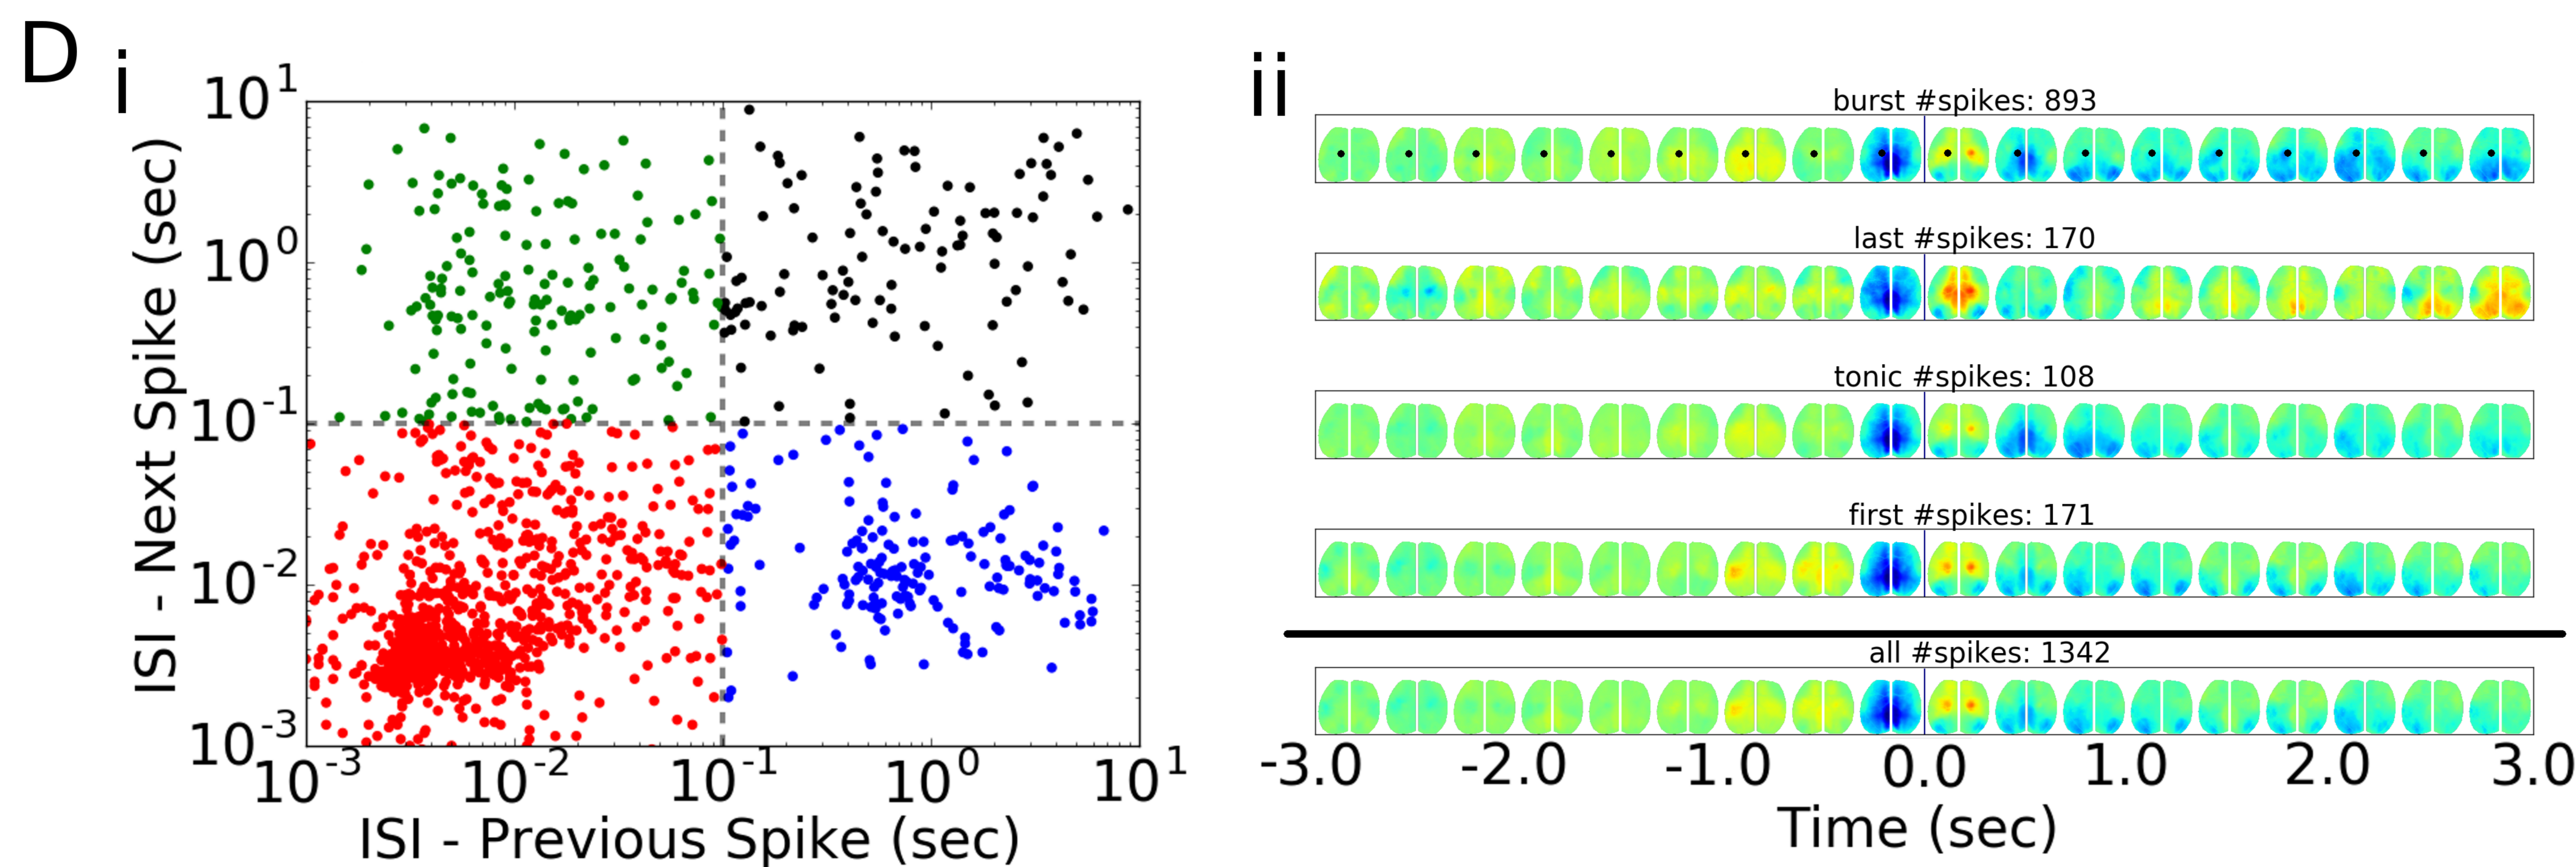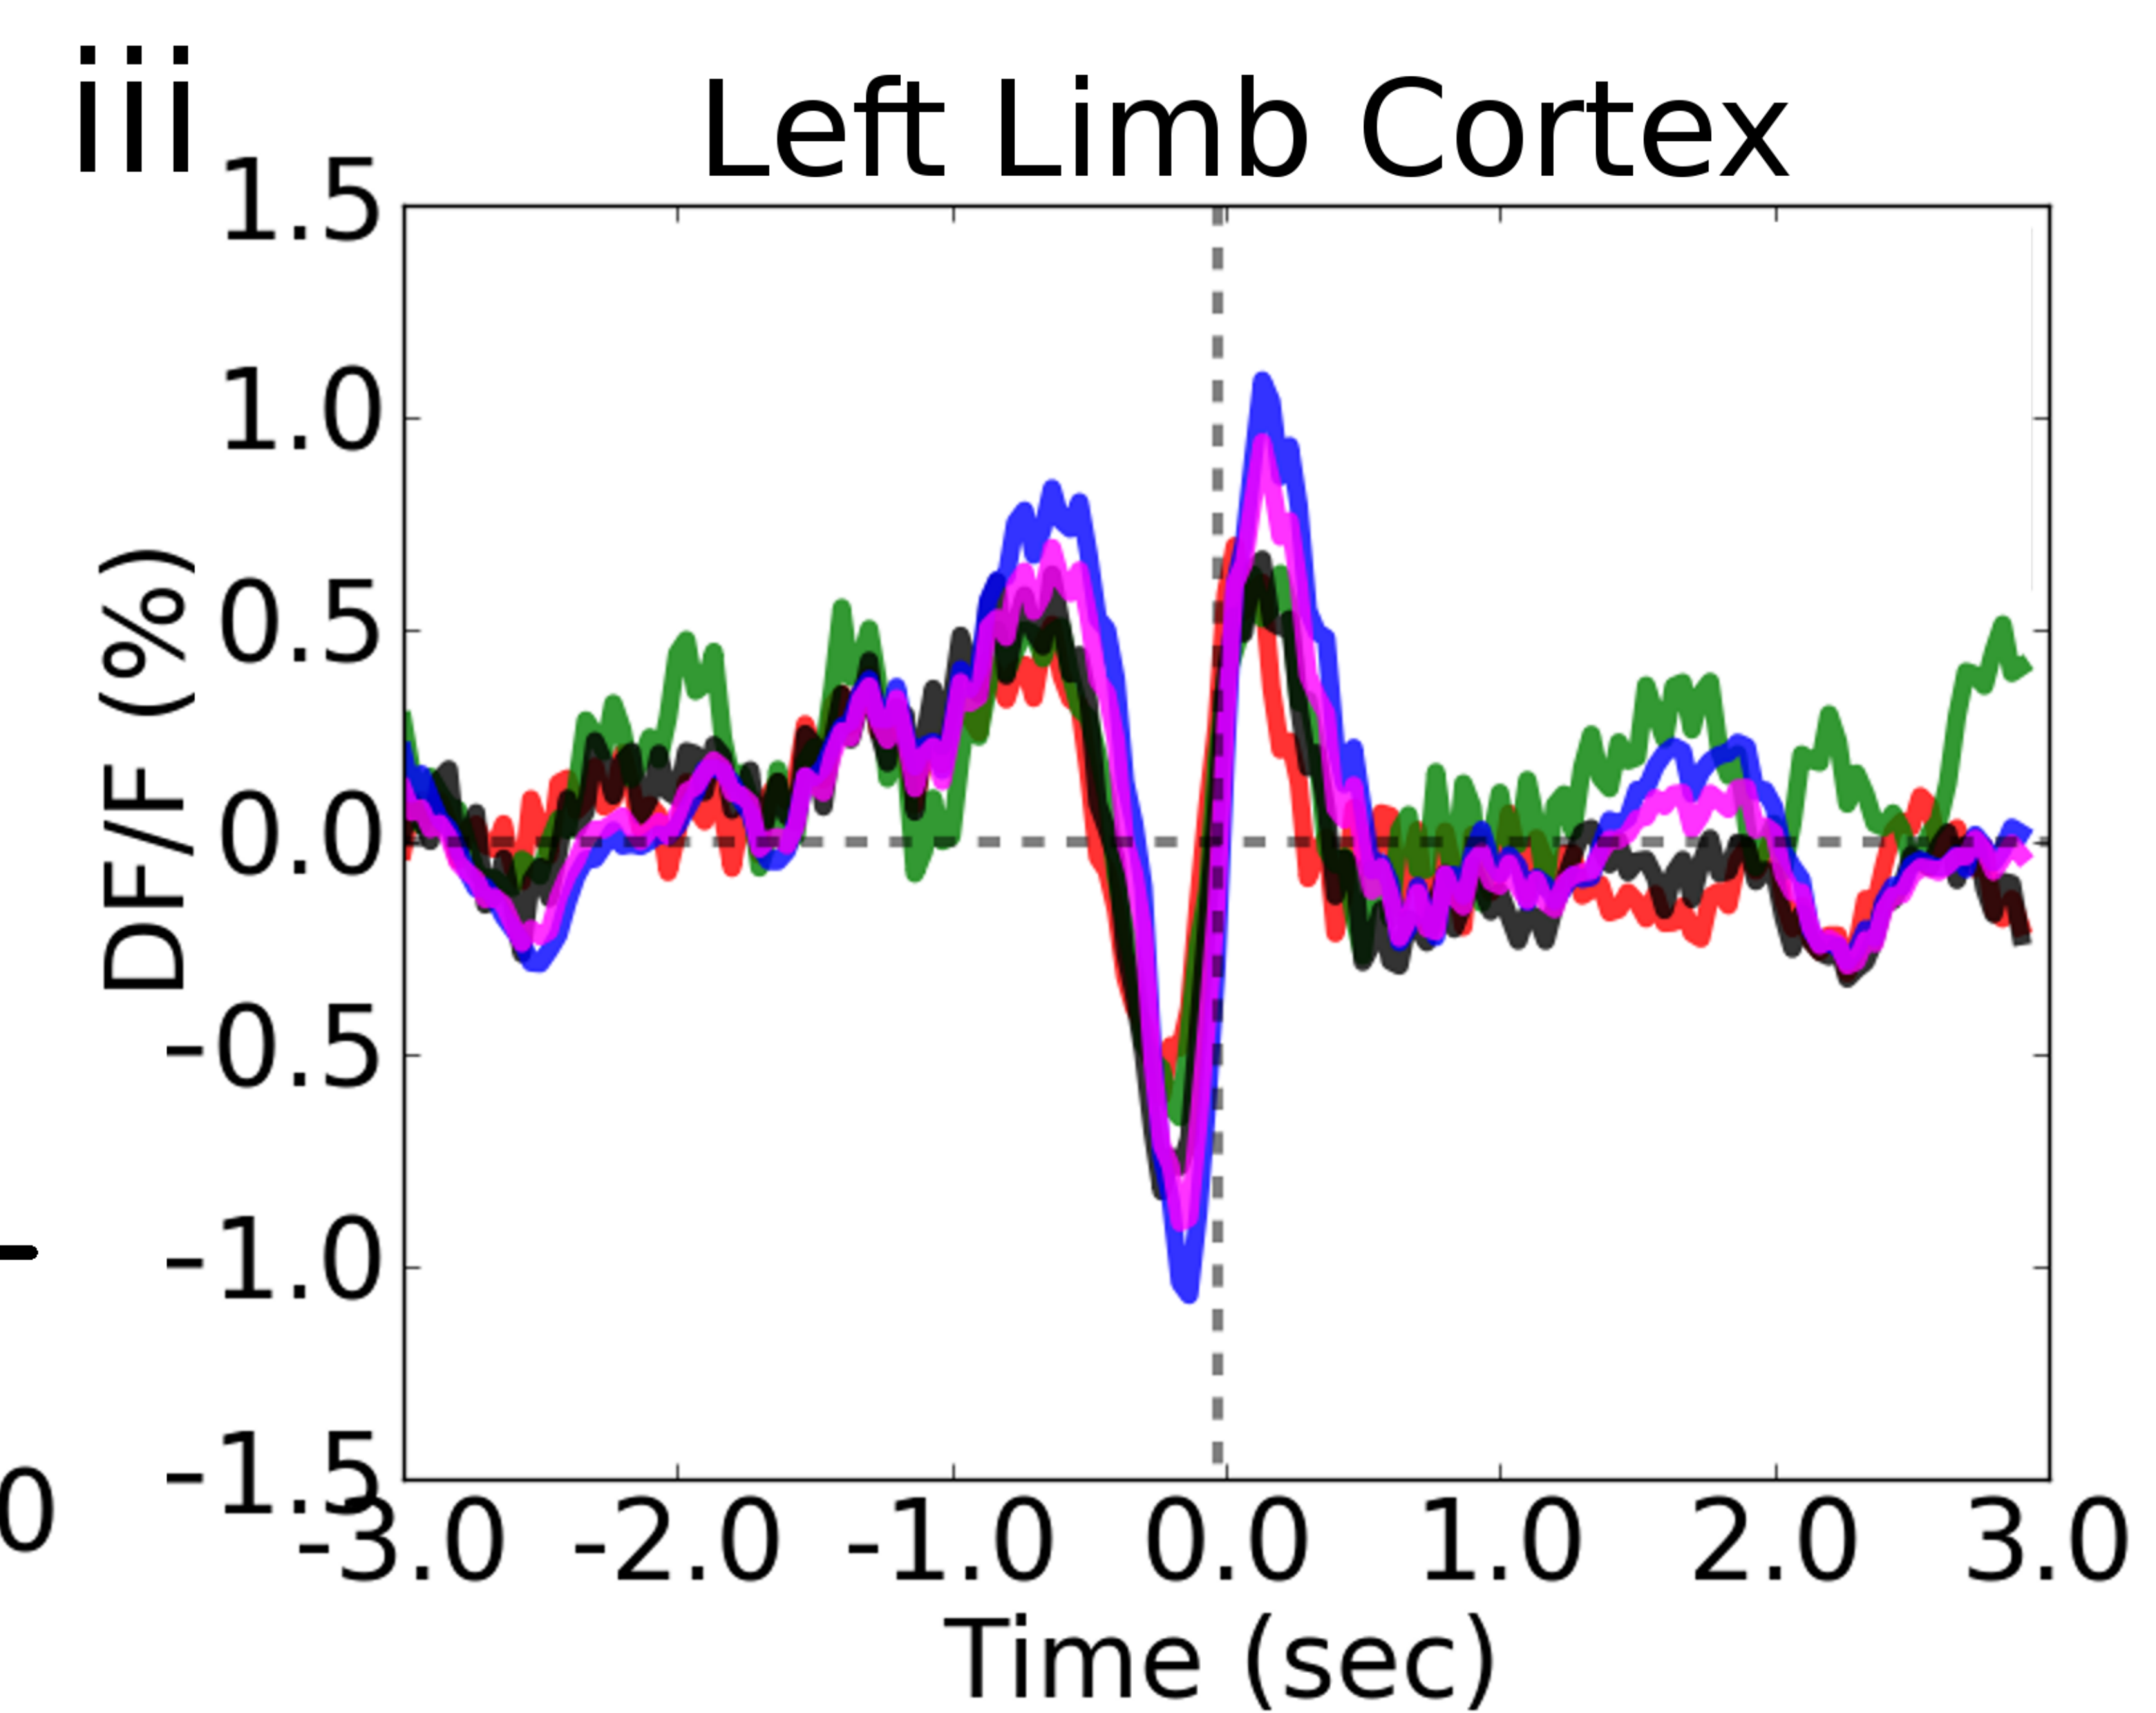

Supplement: supp [file elife_poa_e19976_Figure_6_figure_supplement_1.pdf › elife_poa_e19976_Figure_6_figure_supplement_1.pdf]

# Cortical STMs for All Spikes vs Bursting Conditions

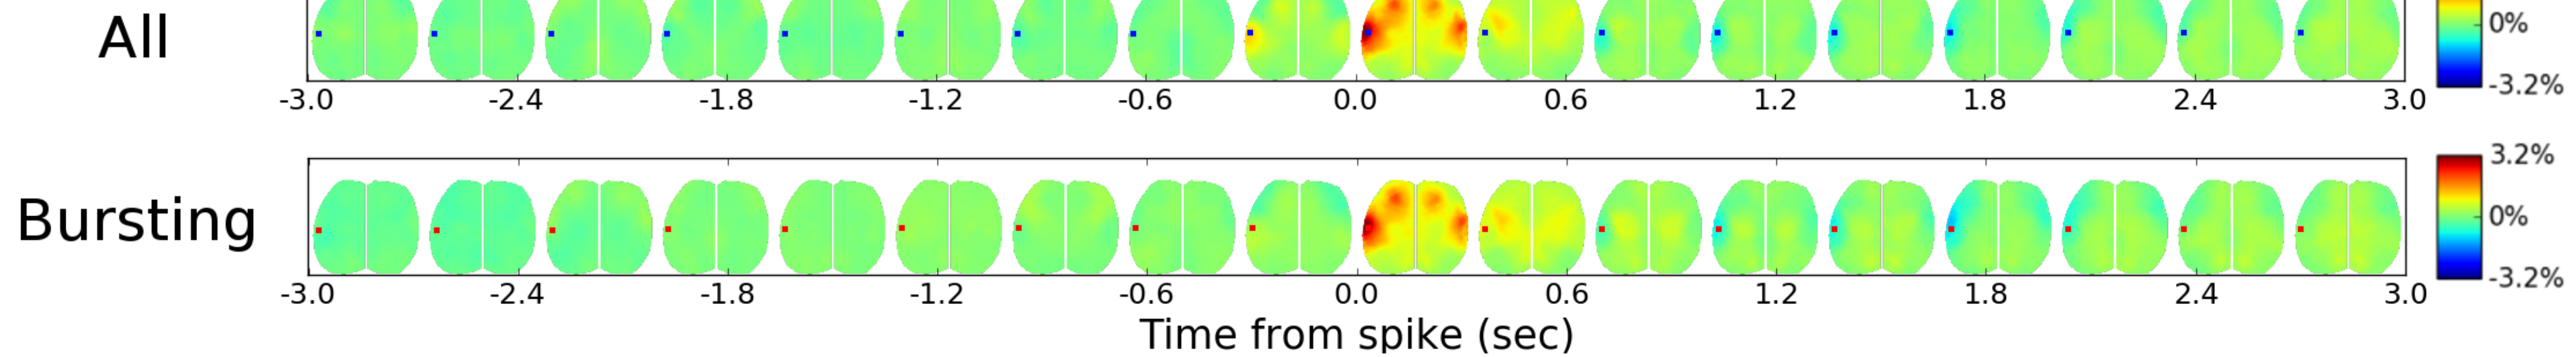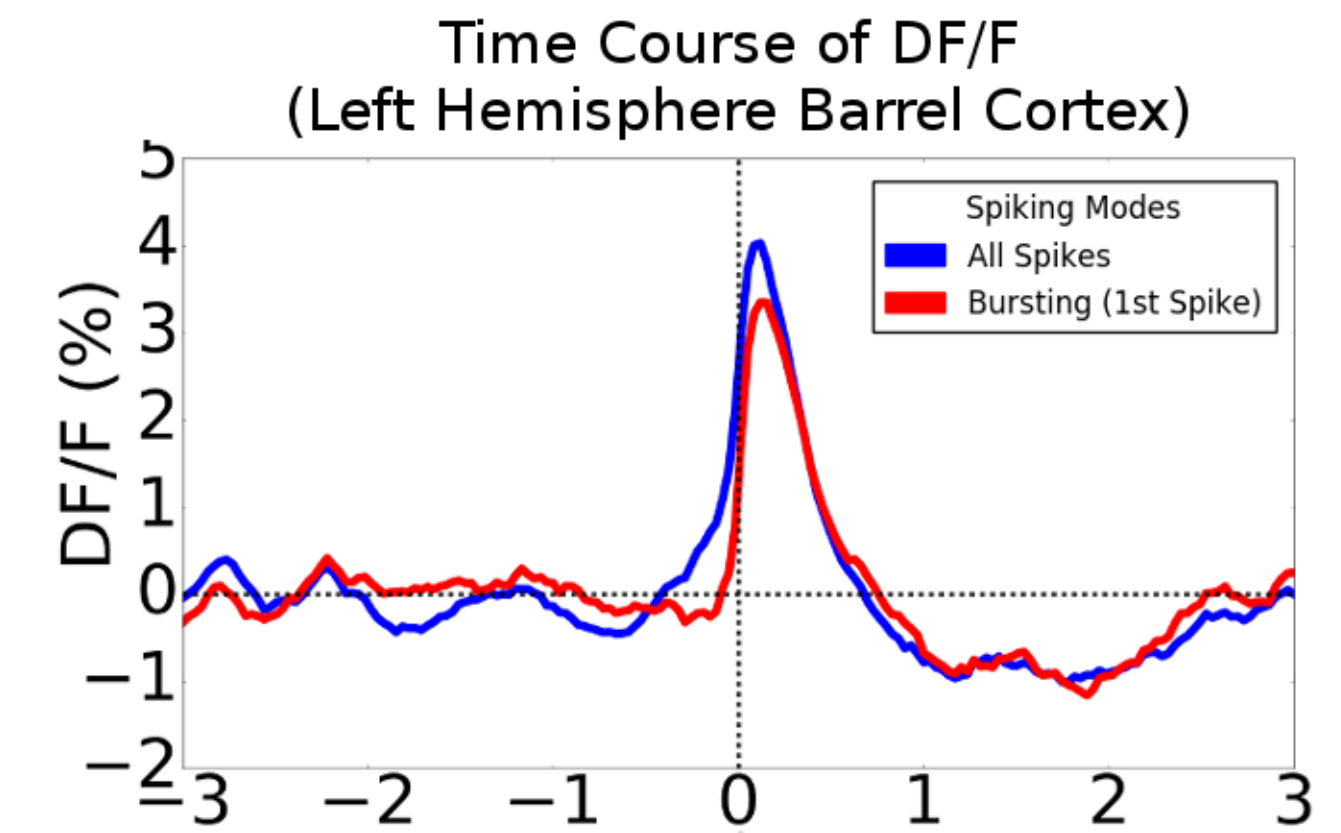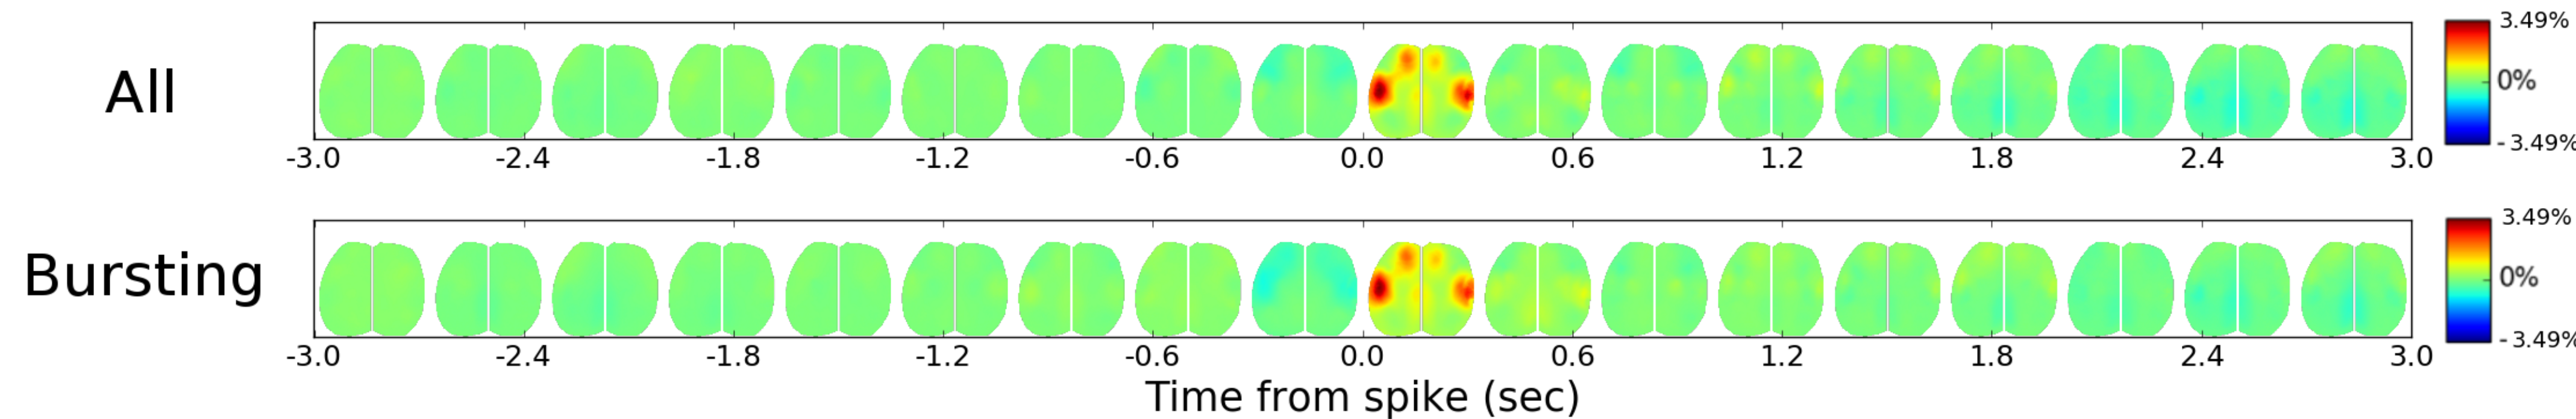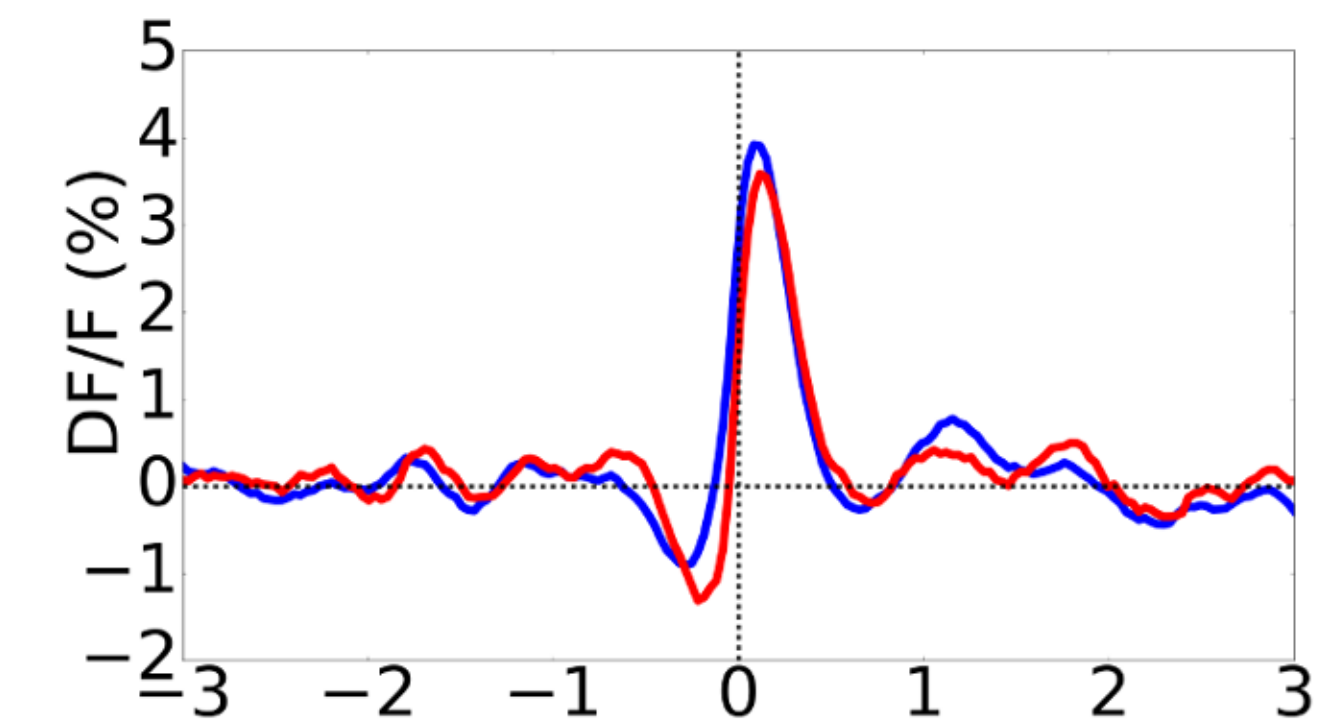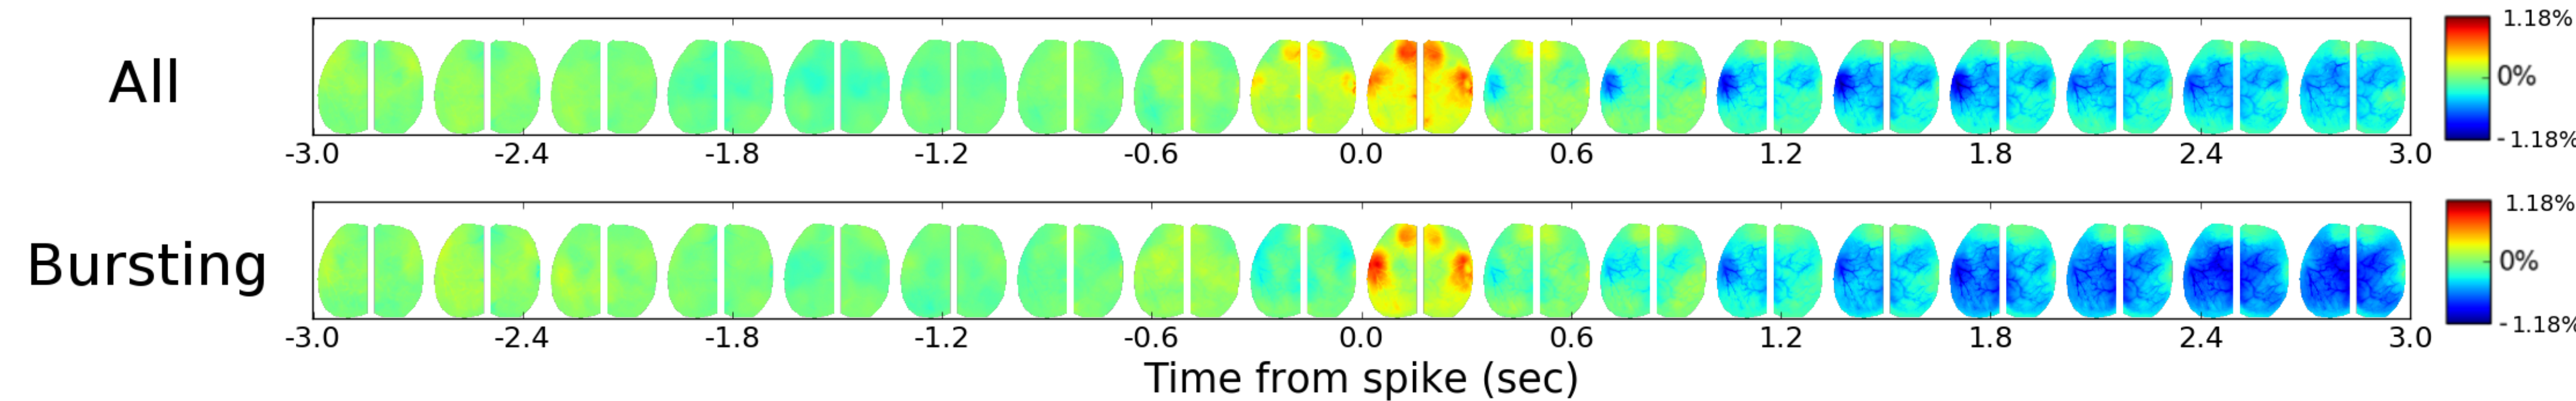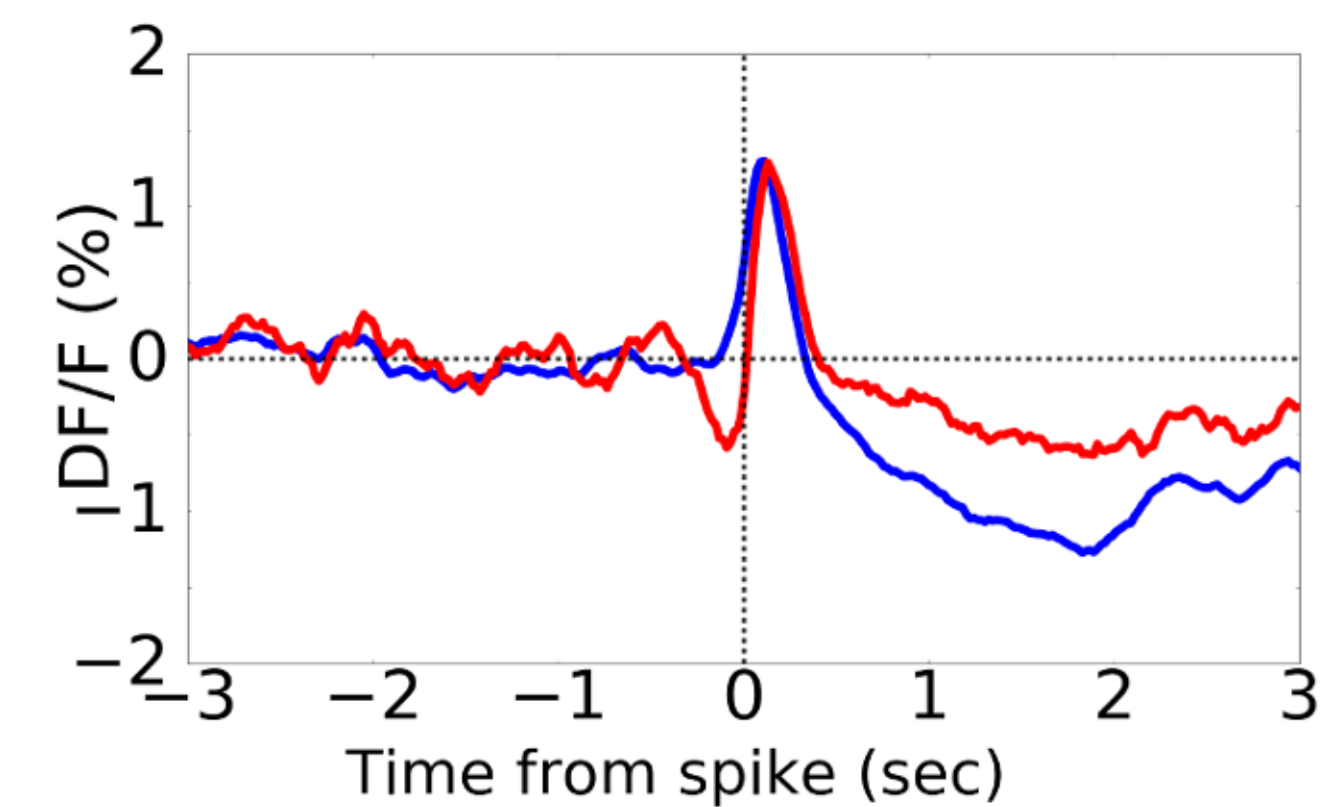

Supplement: supp [file elife_poa_e19976_Figure_6_figure_supplement_2.pdf › elife_poa_e19976_Figure_6_figure_supplement_2.pdf]

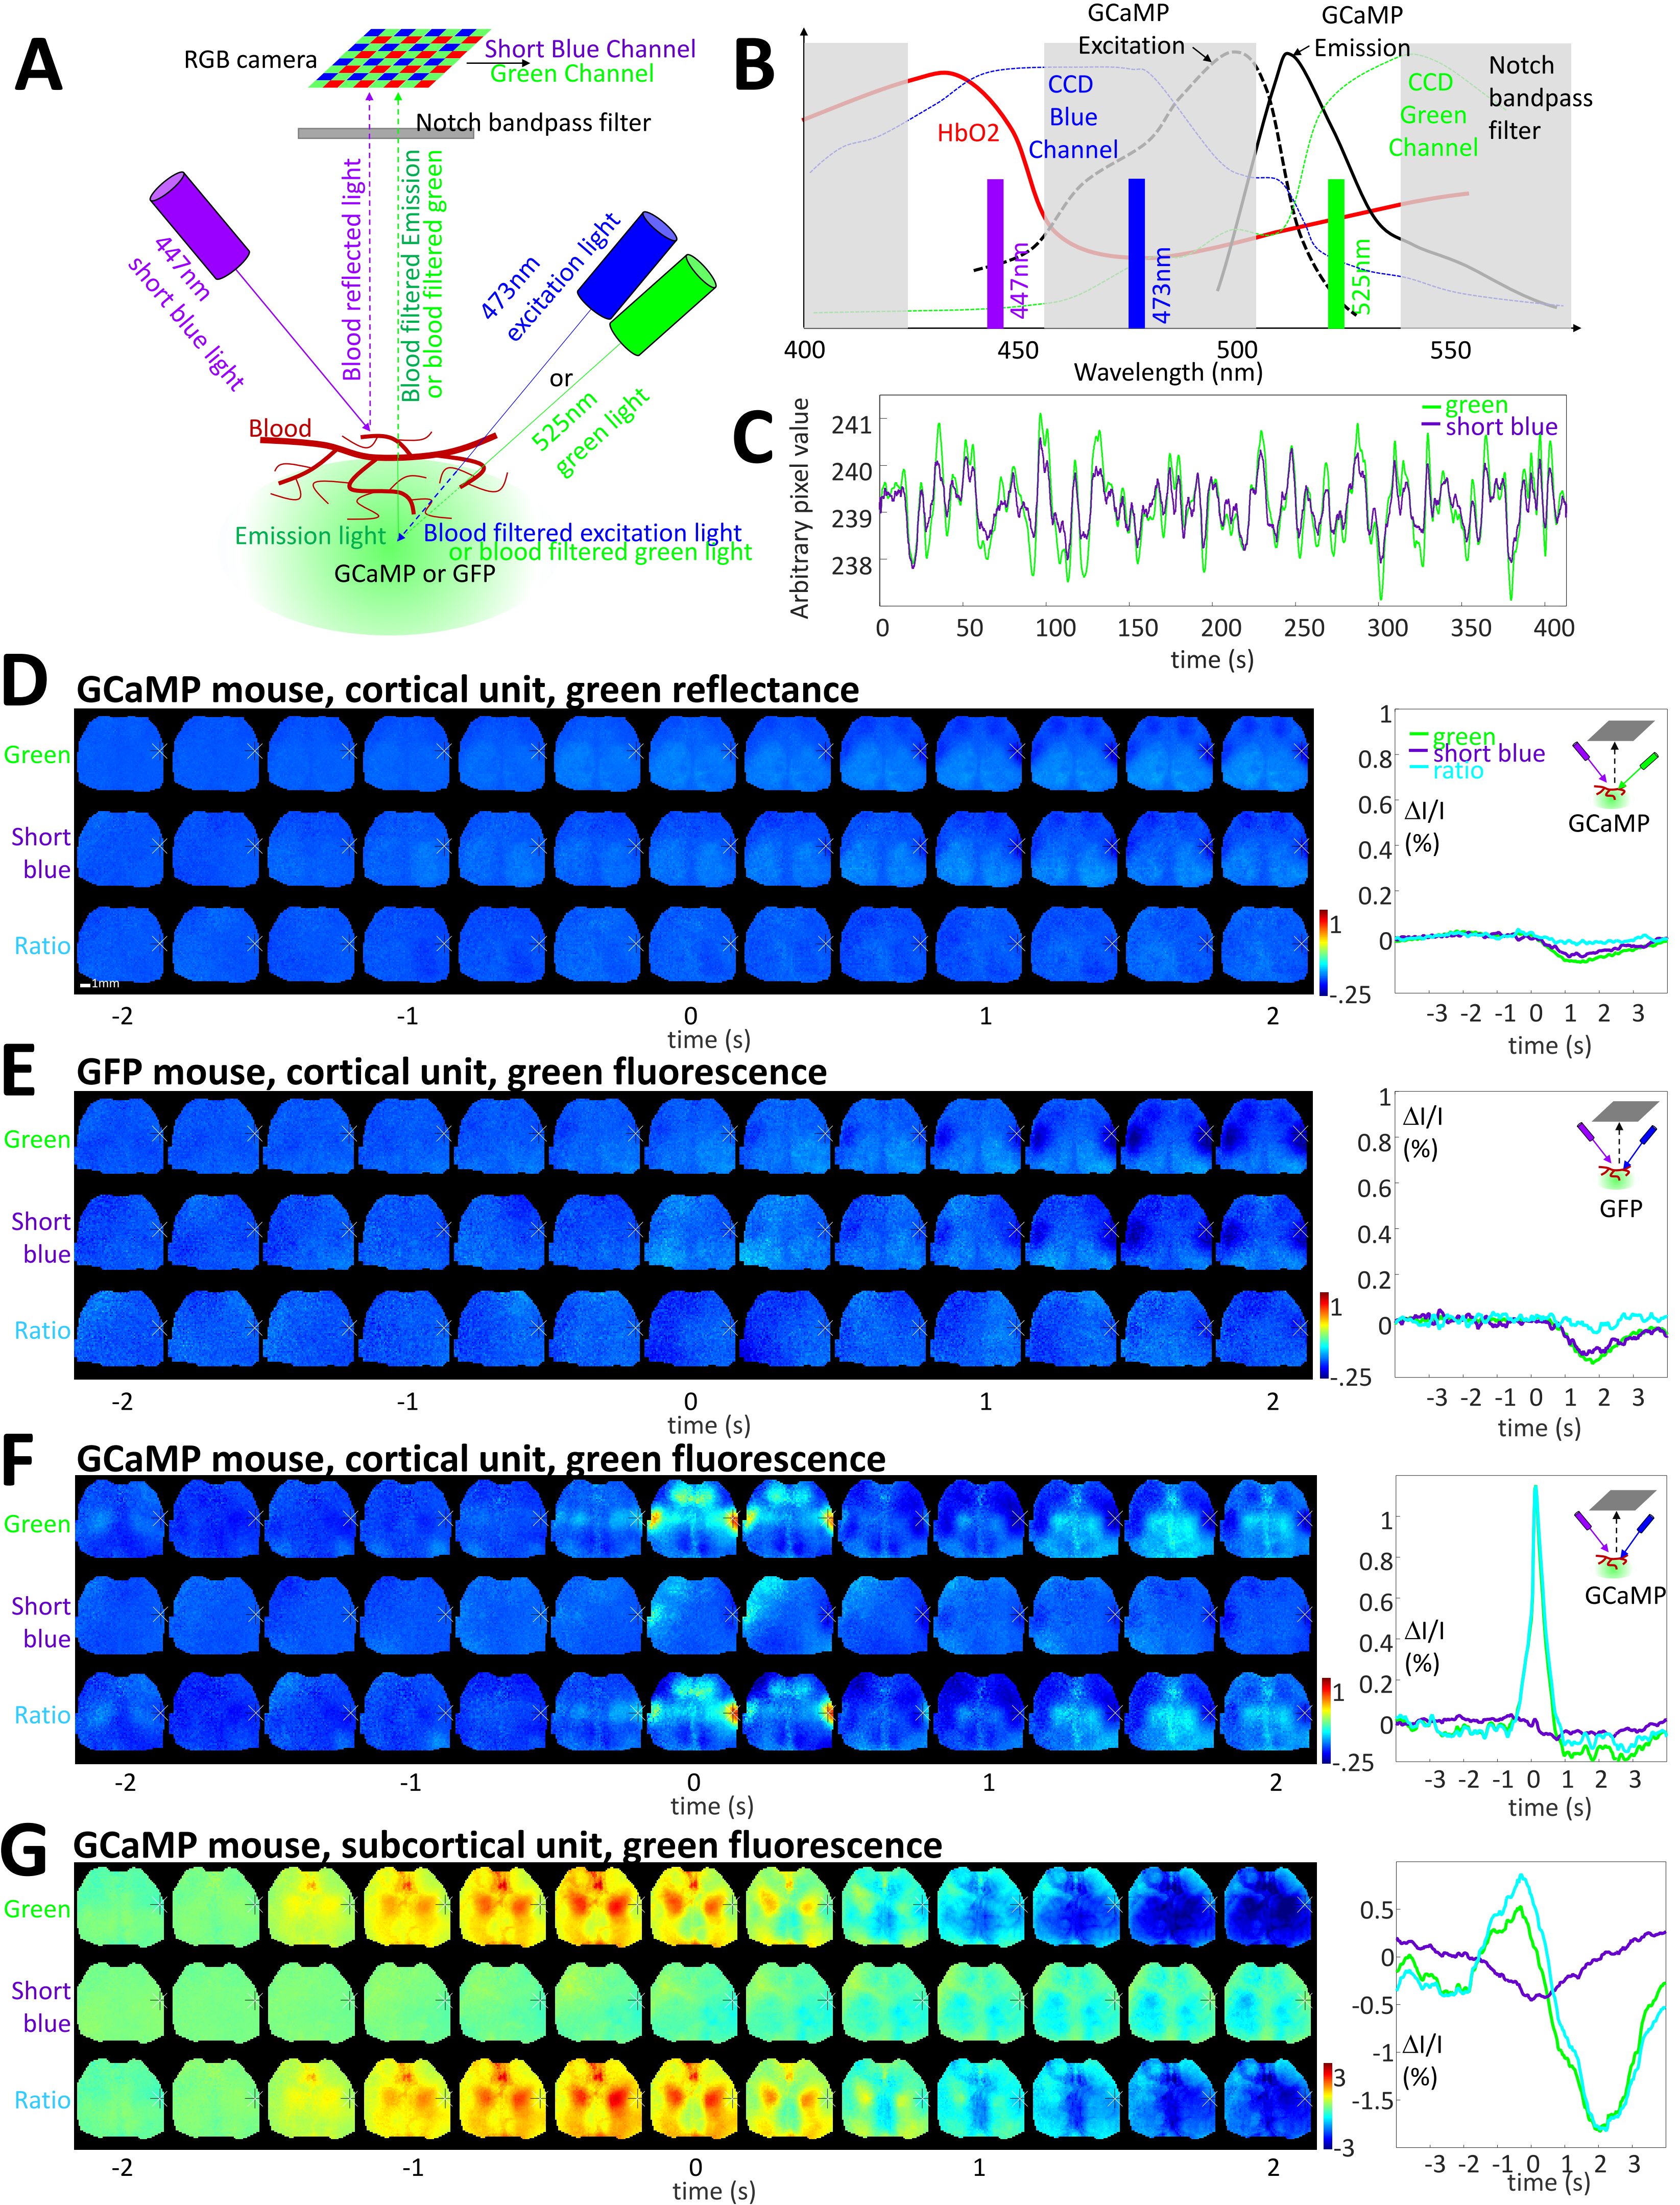

Figure 7-figure supplement 1

Supplement: supp [file elife_poa_e19976_Figure_7_figure_supplement_1.pdf › elife_poa_e19976_Figure_7_figure_supplement_1.pdf]

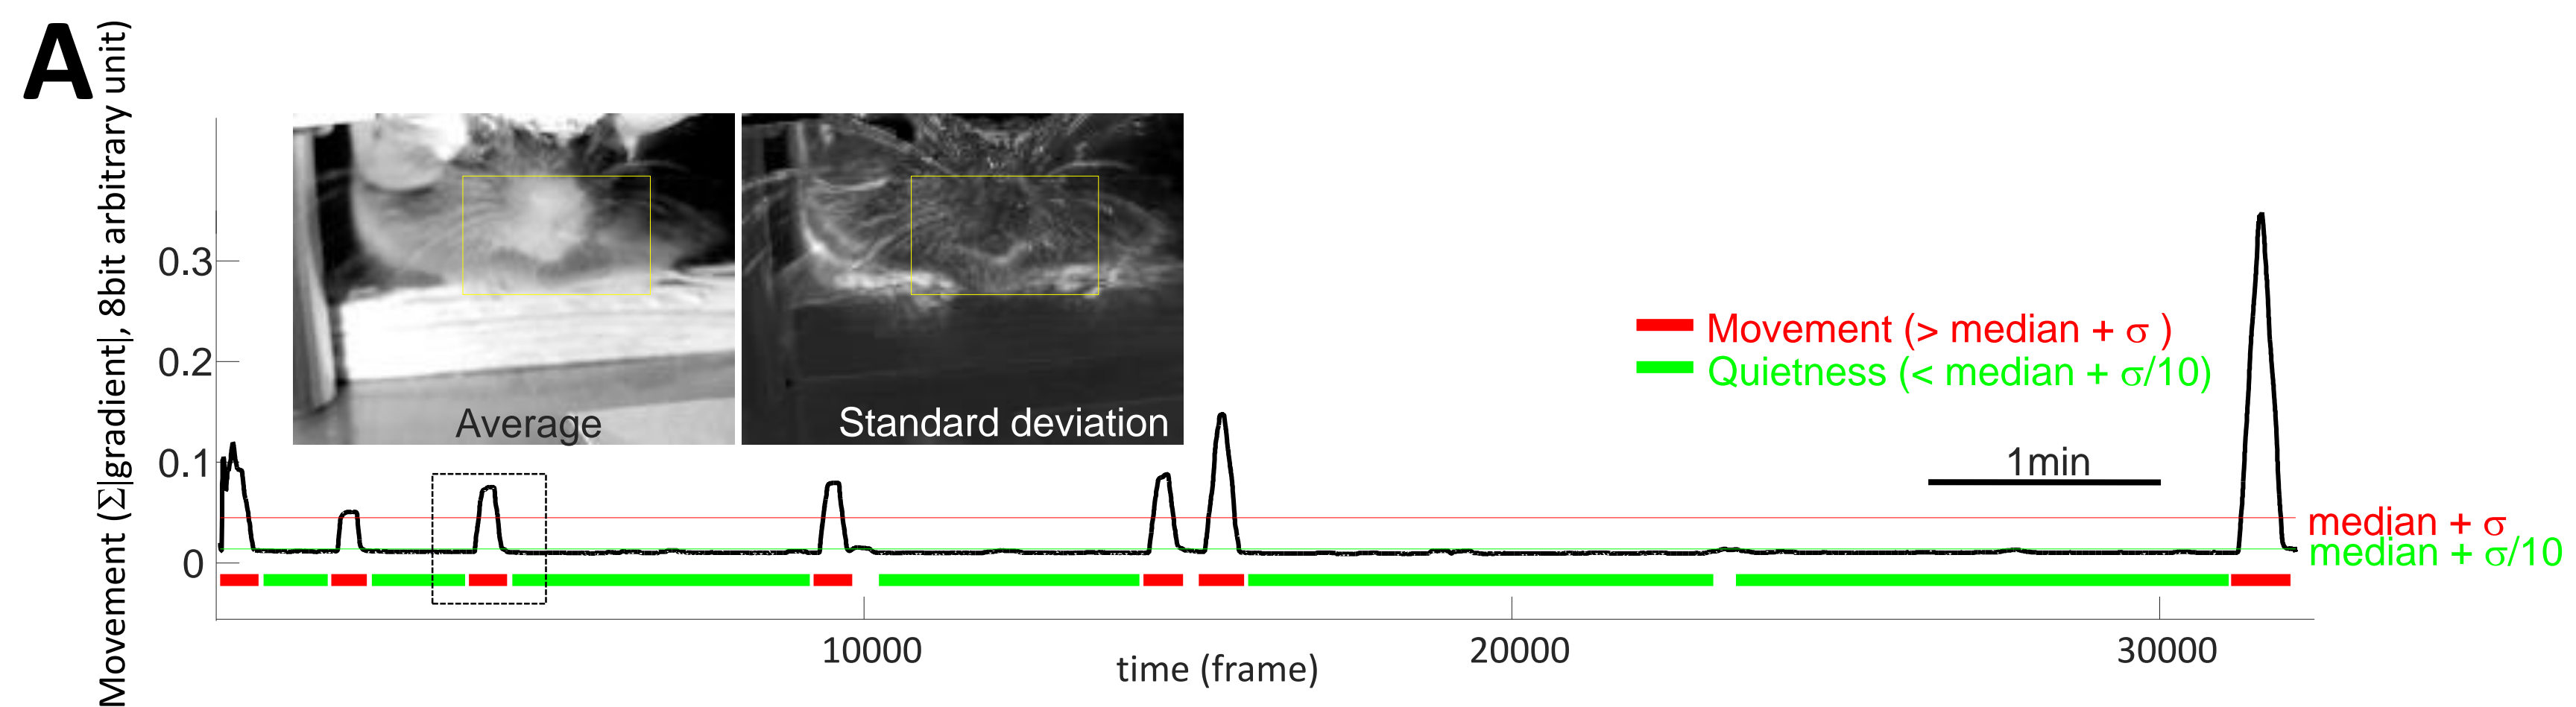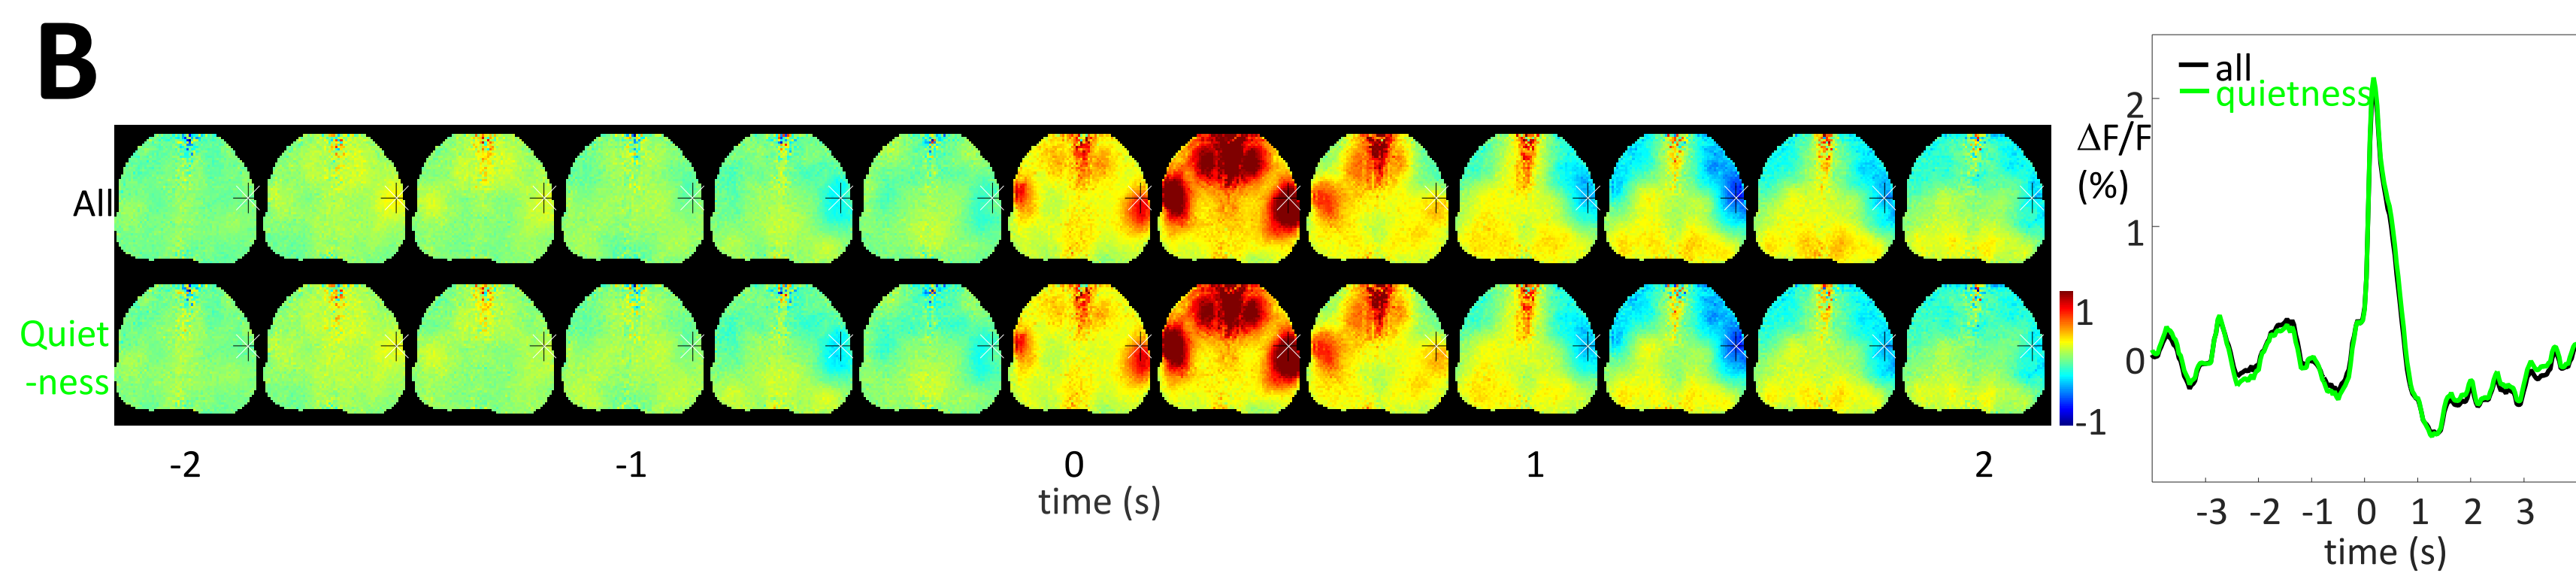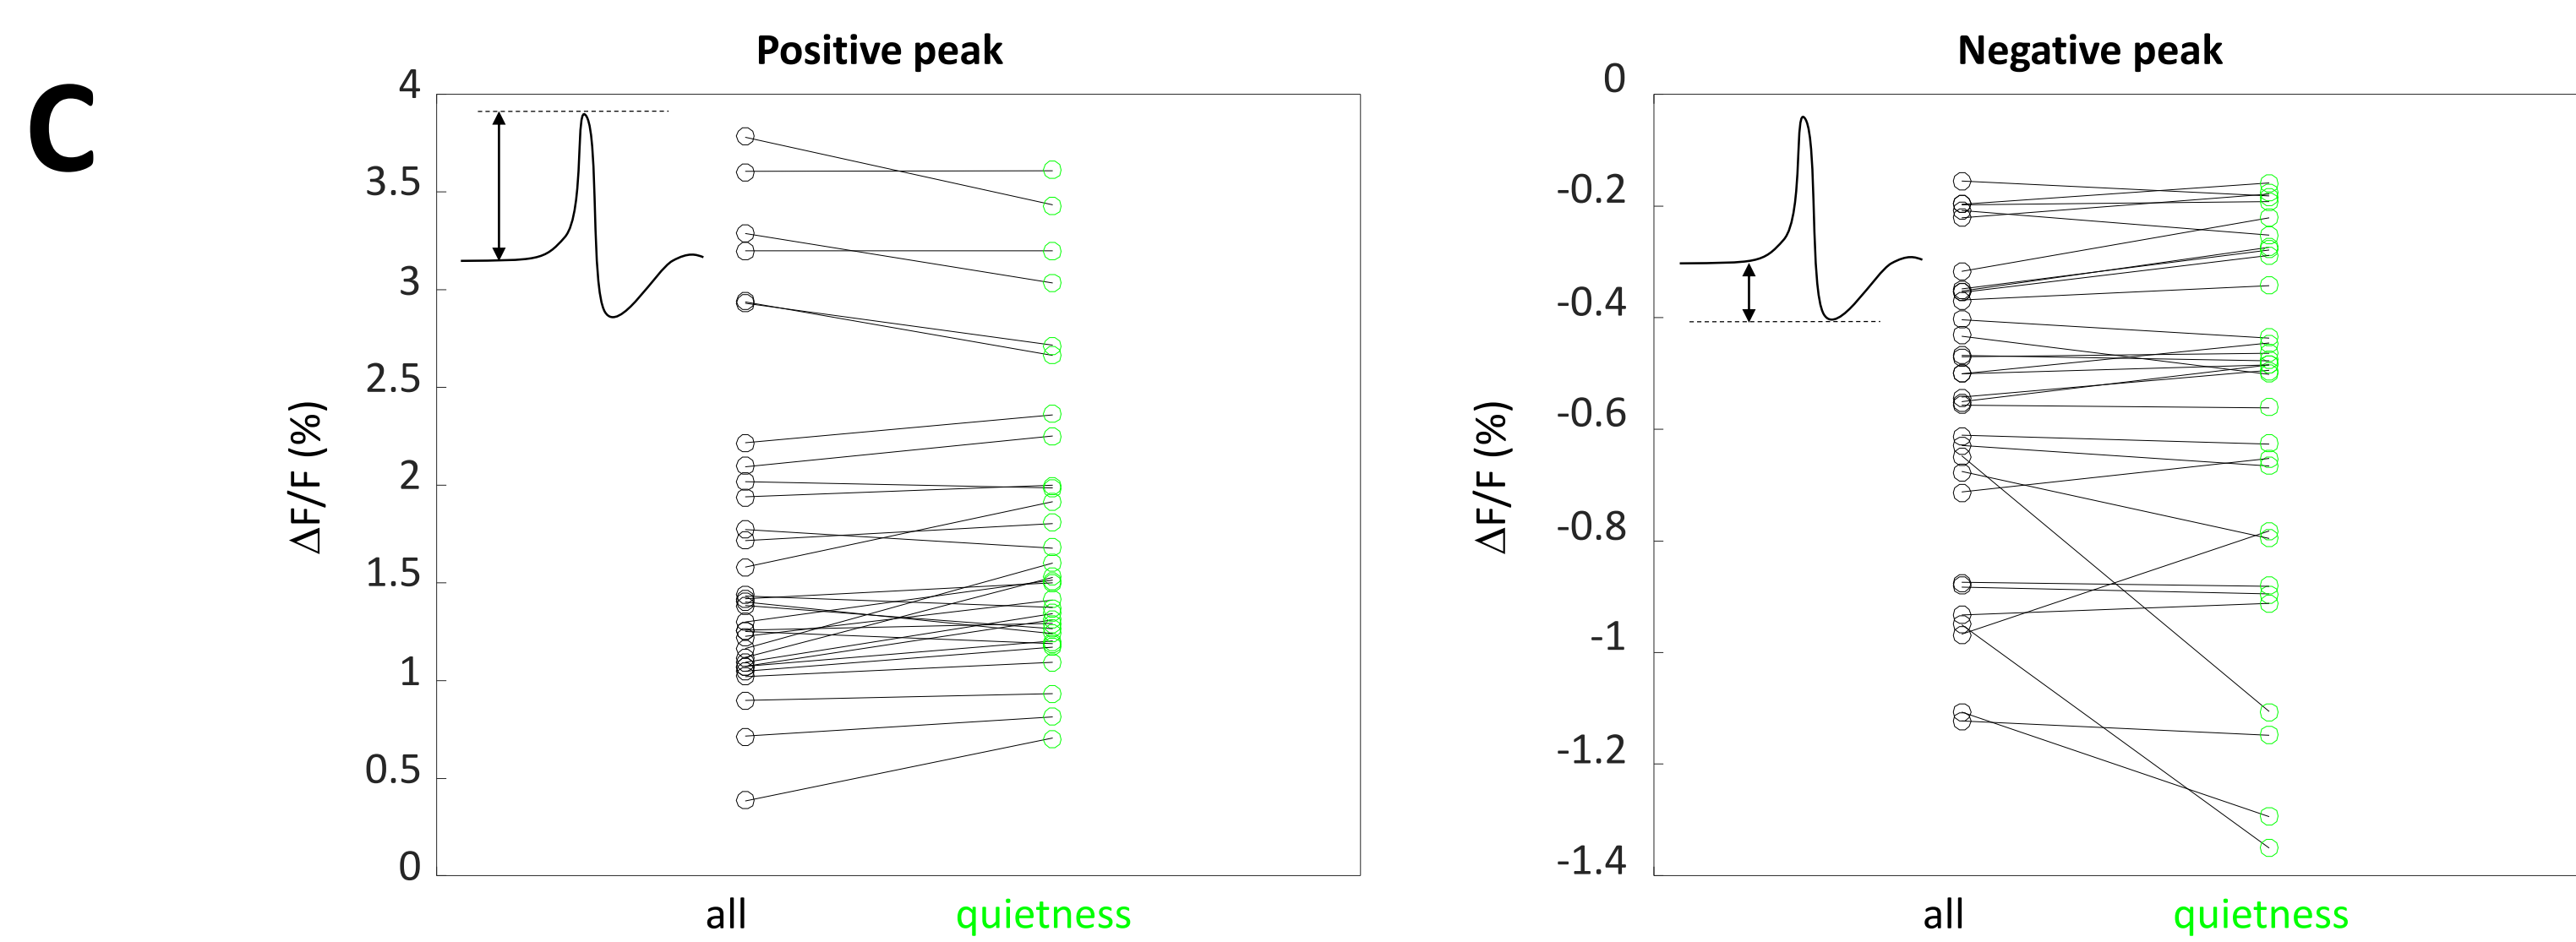

Figure 8-figure supplement 1

Supplement: supp [file elife_poa_e19976_Figure_8_figure_supplement_1.pdf › elife_poa_e19976_Figure_8_figure_supplement_1.pdf]
